# Supplementary material for: Selective C–C coupling of two nitriles affording rare-earth diazametallacyclopentadienes: synthesis, cooperative reactivity and mechanistic studies
Source: Royal Society of Chemistry journal article supplement (doi:10.1039/d3qi00946g), 2023-01-01
Supplement: d3qi00946g2.pdf [file d3qi00946g2.pdf]

## Cover Page for Supporting Information

### *Manuscript Title:*

Selective C–C Coupling of Two Nitriles Affording Rare-Earth Diazametallacyclopentadienes:  
Synthesis, Cooperative Reactivity and Mechanistic Studies

### *Authors:*

Miaomiao Zhu,<sup>‡</sup> Zhengqi Chai,<sup>‡</sup> Tianyu Li, Junnian Wei, Ze-Jie Lv,<sup>\*</sup> and Wen-Xiong Zhang<sup>\*</sup>

### *Affiliations:*

Beijing National Laboratory for Molecular Sciences (BNLMS), State Key Laboratory of Rare Earth Materials Chemistry and Applications & Key Laboratory of Bioorganic Chemistry and Molecular Engineering of Ministry of Education, College of Chemistry and Molecular Engineering, Peking University, Beijing 100871, China

<sup>‡</sup> Authors contributed equally to this work.

### *Contents:*

|                                                                                     |            |
|-------------------------------------------------------------------------------------|------------|
| <b>1) Experimental Details and Characterization Data</b>                            | <b>S2</b>  |
| <b>2) The Proposed Mechanisms for the Formation of 5-Sc and 6-Sc</b>                | <b>S8</b>  |
| <b>3) Copies of <sup>1</sup>H NMR and <sup>13</sup>C{<sup>1</sup>H} NMR Spectra</b> | <b>S10</b> |
| <b>4) X-ray Crystallographic Studies</b>                                            | <b>S20</b> |
| <b>5) Details of DFT Calculations</b>                                               | <b>S31</b> |
| <b>6) References</b>                                                                | <b>S46</b> |

## 1) Experimental Details and Characterization Data

Unless otherwise noted, all starting materials were commercially available and were used without further purification. Solvents were purified by Mbraun SPS-800 Solvent Purification System and dried over fresh Na chips and molecular sieves in a glovebox.  $d^8$ -THF was purchased from Cambridge Isotope Laboratory, degassed, and vacuum transferred to 4 Å molecular sieves. All reactions were operated under an argon atmosphere in a glovebox or under slightly positive dry nitrogen pressure using standard Schlenk line techniques. The argon in the glove box was constantly circulated through a copper/molecular sieves catalyst unit. The oxygen and moisture concentrations in the glovebox atmosphere were monitored by an O<sub>2</sub>/H<sub>2</sub>O Combi-Analyzer to ensure that both were always below 0.1 ppm.

Organometallic samples for NMR spectroscopic measurements were prepared in a glovebox using J. Young valve NMR tubes (Wilmad 528-JY). <sup>1</sup>H and <sup>13</sup>C{<sup>1</sup>H} NMR spectra were recorded on a Bruker Avance 400 MHz, 500 MHz or 600 MHz spectrometer. <sup>1</sup>H and <sup>13</sup>C{<sup>1</sup>H} NMR spectra were reported with reference to solvent resonances of  $d^8$ -THF at 1.73 and 25.37 ppm, (CD<sub>3</sub>)<sub>2</sub>CO (TMS) at 2.05 and 29.84 ppm, respectively. Elemental analyses were performed on a Vario MICRO cube elemental analyzer. HRMS were recorded on a Bruker Apex IV FTMS mass spectrometer using ESI.

Compounds **1**<sup>1</sup> and *N,N'*-diphenylcarbodiimide<sup>2</sup> were prepared following the literature procedures.

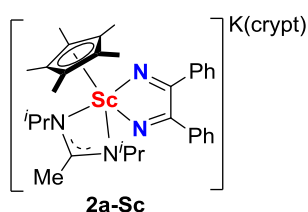

**Synthesis of 2a-Sc:** In the glovebox, PhCN (44.9 μL, 0.44 mmol) was added to a pre-cooled (-35 °C) THF (5 mL) solution of **1-Sc** (97.7 mg, 0.2 mmol) and the reaction mixture gradually turned to pink. The solution was stirred at room temperature for 1 h. [2.2.2]cryptand (75.3 mg, 0.2 mmol) was added to the reaction mixture and the mixture was stirred at room temperature for 1 h. After that, the solvents were removed under reduced pressure to afford deep red solid. The solid was washed with Et<sub>2</sub>O (1 mL × 3) thrice and dried under vacuum affording deep red powder. This red powder was pure enough for NMR experiment without further purification. Yield: 70% (132.1 mg, 0.14 mmol). <sup>1</sup>H NMR (500 MHz,  $d^8$ -THF) δ 1.16 (d, *J* = 6.3 Hz, 6H, (CH<sub>3</sub>)<sub>2</sub>CH), 1.24 (d, *J* = 6.3 Hz, 6H, (CH<sub>3</sub>)<sub>2</sub>CH), 1.80 (s, 3H, CCH<sub>3</sub>), 2.00 (s, 15H, C<sub>5</sub>Me<sub>5</sub>), 2.48-2.50 (m, 12H, NCH<sub>2</sub>CH<sub>2</sub>O), 3.33-3.37 (m, 2H, (CH<sub>3</sub>)<sub>2</sub>CH), 3.47-3.49 (m, 12H, NCH<sub>2</sub>CH<sub>2</sub>O), 3.52 (s, 12H, OCH<sub>2</sub>CH<sub>2</sub>O), 6.77-6.80 (m, 2H, Ph), 6.83-6.86 (m, 4H, Ph), 7.12-7.14 (m, 4H, Ph). <sup>13</sup>C{<sup>1</sup>H} NMR (126 MHz,  $d^8$ -THF) δ 10.91 (CCH<sub>3</sub>), 12.77 (C<sub>5</sub>Me<sub>5</sub>), 25.86 ((CH<sub>3</sub>)<sub>2</sub>CH), 26.63 ((CH<sub>3</sub>)<sub>2</sub>CH), 48.62 ((CH<sub>3</sub>)<sub>2</sub>CH), 54.82

(NCH<sub>2</sub>CH<sub>2</sub>O), 68.50 (NCH<sub>2</sub>CH<sub>2</sub>O), 71.35 (OCH<sub>2</sub>CH<sub>2</sub>O), 114.74 (C<sub>5</sub>Me<sub>5</sub>), 124.44 (Ph), 126.49 (Ph), 128.86 (Ph), 148.46 (Ph), 163.20 (PhCN), 171.04 (NCN). After recrystallization by slowly diffusion of hexane into the THF solution of **2a-Sc** for 3 days, the single crystals suitable for X-ray analysis could be obtained. Anal. Calcd for C<sub>50</sub>H<sub>78</sub>KN<sub>6</sub>O<sub>6</sub>Sc of **2a-Sc**: C, 63.67; H, 8.34; N, 8.91. Found: C 63.92; H 8.68; N 8.24.

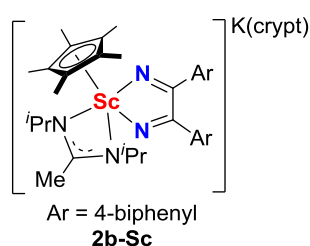

**Synthesis of 2b-Sc:** This complex was prepared from the reaction of **1-Sc** (97.7 mg, 0.2 mmol) and 4-phenylbenzotrile (78.9 mg, 0.44 mmol) in THF by an analogous procedure as the synthesis of **2a-Sc**. The solid was washed with Et<sub>2</sub>O (1 mL × 3) thrice and dried under vacuum affording deep purple powder. This deep purple powder was pure enough for NMR experiment without further purification. Yield: 127.1 mg, 58%. <sup>1</sup>H NMR (500 MHz, *d*<sup>8</sup>-THF) δ 1.19-1.21 (m, 6H, (CH<sub>3</sub>)<sub>2</sub>CH), 1.27 (d, *J* = 6.2 Hz, 6H, (CH<sub>3</sub>)<sub>2</sub>CH), 1.82 (s, 3H, CCH<sub>3</sub>), 2.02 (s, 15H, C<sub>5</sub>Me<sub>5</sub>), 2.45-2.46 (m, 12H, NCH<sub>2</sub>CH<sub>2</sub>O), 3.35-3.38 (m, 2H, (CH<sub>3</sub>)<sub>2</sub>CH), 3.42-3.45 (m, 12H, NCH<sub>2</sub>CH<sub>2</sub>O), 3.48 (s, 12H, OCH<sub>2</sub>CH<sub>2</sub>O), 7.13-7.17 (m, 2H, biphenyl), 7.22-7.23 (m, 4H, biphenyl), 7.28-7.31 (m, 8H, biphenyl), 7.54-7.56 (m, 4H, biphenyl). <sup>13</sup>C{<sup>1</sup>H} NMR (126 MHz, *d*<sup>8</sup>-THF) δ 10.93 (CCH<sub>3</sub>), 12.78 (C<sub>5</sub>Me<sub>5</sub>), 25.86 ((CH<sub>3</sub>)<sub>2</sub>CH), 26.65 ((CH<sub>3</sub>)<sub>2</sub>CH), 48.65 ((CH<sub>3</sub>)<sub>2</sub>CH), 54.78 (NCH<sub>2</sub>CH<sub>2</sub>O), 68.48 (NCH<sub>2</sub>CH<sub>2</sub>O), 71.34 (OCH<sub>2</sub>CH<sub>2</sub>O), 114.87 (C<sub>5</sub>Me<sub>5</sub>), 125.35 (biphenyl), 126.71 (biphenyl), 127.37 (biphenyl), 129.15 (biphenyl), 129.42 (biphenyl), 137.13 (biphenyl), 143.32 (biphenyl), 147.19 (biphenyl), 162.69 (ArCN), 171.13 (NCN). After recrystallization by slowly diffusion of hexane into the THF solution of **2b-Sc** for 3 days, the single crystals of **2b-Sc · THF** suitable for X-ray analysis could be obtained. Anal. Calcd for C<sub>66</sub>H<sub>94</sub>KN<sub>6</sub>O<sub>7</sub>Sc of **2b-Sc · THF**: C, 67.90; H, 8.12; N, 7.20. Found: C 67.64; H 7.82; N 7.34.

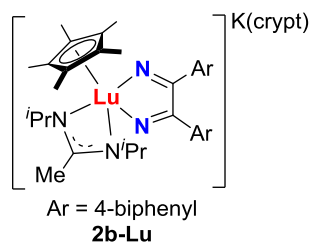

**Synthesis of 2b-Lu:** This complex was prepared from the reaction of **1-Lu** (123.7 mg, 0.2 mmol) and 4-phenylbenzotrile (78.9 mg, 0.44 mmol) in THF by an analogous procedure as the synthesis of **2a-Sc**. The solid was washed with Et<sub>2</sub>O (1 mL × 3) thrice and dried under vacuum affording deep purple powder. This deep purple powder was pure enough for NMR experiment without further purification. Yield: 122.5 mg, 50%. <sup>1</sup>H NMR (500 MHz, *d*<sup>8</sup>-THF) δ 1.21 (br, 12H, (CH<sub>3</sub>)<sub>2</sub>CH), 1.80 (s, 3H, CCH<sub>3</sub>), 2.03 (s, 15H, C<sub>5</sub>Me<sub>5</sub>), 2.41-2.43 (m, 12H, NCH<sub>2</sub>CH<sub>2</sub>O), 3.37-3.41 (m, 14H, (CH<sub>3</sub>)<sub>2</sub>CH, NCH<sub>2</sub>CH<sub>2</sub>O), 3.45 (s, 12H, OCH<sub>2</sub>CH<sub>2</sub>O), 7.14-7.17 (m, 2H, biphenyl), 7.23-7.24 (m, 4H,

biphenyl), 7.28-7.31 (m, 4H, biphenyl), 7.34-7.36 (m, 4H, biphenyl), 7.54-7.55 (m, 4H, biphenyl).  $^{13}\text{C}\{^1\text{H}\}$  NMR (126 MHz,  $d^8$ -THF)  $\delta$  11.32 (CCH<sub>3</sub>), 12.22 (C<sub>5</sub>Me<sub>5</sub>), 25.86 ((CH<sub>3</sub>)<sub>2</sub>CH), 26.83 ((CH<sub>3</sub>)<sub>2</sub>CH), 48.28 ((CH<sub>3</sub>)<sub>2</sub>CH), 54.95 (NCH<sub>2</sub>CH<sub>2</sub>O), 68.71 (NCH<sub>2</sub>CH<sub>2</sub>O), 71.66 (OCH<sub>2</sub>CH<sub>2</sub>O), 113.59 (C<sub>5</sub>Me<sub>5</sub>), 125.35 (biphenyl), 126.74 (biphenyl), 127.37 (biphenyl), 129.16 (biphenyl), 129.46 (biphenyl), 137.10 (biphenyl), 143.28 (biphenyl), 148.56 (biphenyl), 164.06 (ArCN), 170.98 (NCN). After recrystallization by slowly diffusion of hexane into the THF solution of **2b-Lu**·THF for 3 days, the single crystals suitable for X-ray analysis could be obtained. Anal. Calcd for C<sub>66</sub>H<sub>94</sub>KLuN<sub>6</sub>O<sub>7</sub> of **2b-Lu**·THF: C, 61.09; H, 7.30; N, 6.48. Found: C 61.05; H 7.50; N 6.53.

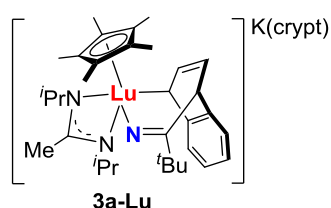

**Synthesis of 3a-Lu:** In the glovebox, <sup>t</sup>BuCN (26.5  $\mu\text{L}$ , 0.24 mmol) was added to a THF solution of **1-Lu** (123.7 mg, 0.2 mmol) at  $-35$  °C. Then this solution was warmed to room temperature and stirred for 1 h. The reaction mixture gradually turned to yellow.

After that, [2.2.2]cryptand (75.3 mg, 0.2 mmol) was added to the reaction mixture and the mixture was stirred at room temperature for 1 h. Then the volatiles were removed under reduced pressure to afford yellow solid. The solid was washed with Et<sub>2</sub>O (1 mL  $\times$  3) thrice and dissolved in 3 mL THF. Slowly diffracting of hexane into this THF solution for 3 days afforded the yellow single crystals of **3a-Lu**. Yield: 133.7 mg, 62%.  $^1\text{H}$  NMR (600 MHz,  $d^8$ -THF)  $\delta$  -0.12 (d,  $J$  = 6.1 Hz, 3H, (CH<sub>3</sub>)<sub>2</sub>CH), 1.10-1.12 (m, 6H, (CH<sub>3</sub>)<sub>2</sub>CH), 1.16 (s, 9H, (CH<sub>3</sub>)<sub>3</sub>C), 1.45 (d,  $J$  = 6.5 Hz, 3H, (CH<sub>3</sub>)<sub>2</sub>CH), 1.50 (s, 3H, CCH<sub>3</sub>), 2.03 (s, 15H, C<sub>5</sub>Me<sub>5</sub>), 2.49-2.52 (m, 12H, NCH<sub>2</sub>CH<sub>2</sub>O), 2.58-2.59 (1H, naph), 2.94-2.99 (m, 1H, (CH<sub>3</sub>)<sub>2</sub>CH), 3.48-3.50 (m, 12H, NCH<sub>2</sub>CH<sub>2</sub>O), 3.54 (s, 12H, OCH<sub>2</sub>CH<sub>2</sub>O), 3.61-3.65 (m, 1H, (CH<sub>3</sub>)<sub>2</sub>CH), 4.22-4.25 (m, 1H, naph), 4.49-4.51 (m, 1H, naph), 5.87-5.91 (m, 1H, naph), 6.17-6.24 (m, 1H, naph), 6.28-6.34 (m, 2H, naph), 6.40-6.42 (m, 1H, naph).  $^{13}\text{C}\{^1\text{H}\}$  NMR (151 MHz,  $d^8$ -THF)  $\delta$  10.68 (CCH<sub>3</sub>), 12.80 (C<sub>5</sub>Me<sub>5</sub>), 25.97 ((CH<sub>3</sub>)<sub>2</sub>CH), 27.76 ((CH<sub>3</sub>)<sub>2</sub>CH), 29.36 ((CH<sub>3</sub>)<sub>3</sub>C), 41.69 ((CH<sub>3</sub>)<sub>3</sub>C), 48.36 ((CH<sub>3</sub>)<sub>2</sub>CH), 48.50 ((CH<sub>3</sub>)<sub>2</sub>CH), 50.02 (Lu-N=C-CH), 54.81 (NCH<sub>2</sub>CH<sub>2</sub>O), 66.28 (Lu-CH), 68.52 (NCH<sub>2</sub>CH<sub>2</sub>O), 71.34 (OCH<sub>2</sub>CH<sub>2</sub>O), 105.03 (naph), 113.13 (C<sub>5</sub>Me<sub>5</sub>), 117.1 (naph), 122.35 (naph), 122.50 (naph), 126.68 (naph), 130.93 (naph), 132.74 (naph), 145.08 (naph), 170.22 (NCN), 174.92 (Lu-NC). Anal. Calcd for C<sub>51</sub>H<sub>85</sub>KLuN<sub>5</sub>O<sub>6</sub> of **3a-Lu**: C, 56.81; H, 7.95; N, 6.49. Found: C 56.97; H 8.22; N 6.32.

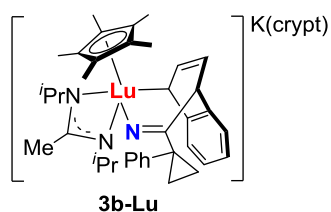

**Synthesis of 3b-Lu:** This complex was prepared from the reaction of **1-Lu** (123.7 mg, 0.2 mmol) and 1-phenylcyclopropanecarbonitrile (34.4  $\mu$ L, 0.24 mmol) in THF by an analogous procedure as the synthesis of **3a-Lu**. The single crystals of **3b-Lu** suitable for X-ray analysis could be acquired by slowly diffusion of hexane into the THF solution for 3 days. Yield: 129.8 mg, 57%.  $^1\text{H}$  NMR (400 MHz,  $d^8$ -THF)  $\delta$  1.00 (d,  $J$  = 6.1 Hz, 3H,  $(\text{CH}_3)_2\text{CH}$ ), 1.15-1.16 (m, 6H,  $(\text{CH}_3)_2\text{CH}$ ), 1.31 (d,  $J$  = 6.4 Hz, 3H,  $(\text{CH}_3)_2\text{CH}$ ), 1.69-1.72 (m, 2H,  $\text{CH}_2$ ), 1.80 (s, 3H,  $\text{CCH}_3$ ), 1.85 (s, 15H,  $\text{C}_5\text{Me}_5$ ), 1.93-1.98 (m, 2H,  $\text{CH}_2$ ), 2.45-2.48 (m, 12H,  $\text{NCH}_2\text{CH}_2\text{O}$ ), 2.72 (d,  $J$  = 6.0 Hz, 1H, Ar), 3.43-3.46 (m, 12H,  $\text{NCH}_2\text{CH}_2\text{O}$ ), 3.49 (s, 12H,  $\text{OCH}_2\text{CH}_2\text{O}$ ), 3.53-3.58 (m, 1H,  $(\text{CH}_3)_2\text{CH}$ ), 3.62-3.67 (m, 1H,  $(\text{CH}_3)_2\text{CH}$ ), 4.12-4.14 (m, 1H, Ar), 4.33-4.37 (m, 1H, Ar), 5.86-5.89 (m, 1H, Ar), 6.20-6.26 (m, 1H, Ar), 6.50-6.54 (m, 2H, Ar), 6.65-6.68 (m, 1H, Ar), 6.97-7.03 (m, 1H, Ar), 7.14-7.18 (m, 2H, Ar), 7.43-7.45 (m, 2H, Ar).  $^{13}\text{C}\{^1\text{H}\}$  NMR (151 MHz,  $d^8$ -THF)  $\delta$  11.67 ( $\text{CCH}_3$ ), 12.50 ( $\text{C}_5\text{Me}_5$ ), 13.27 ( $\text{CH}_2$ ), 14.11 ( $\text{CH}_2$ ), 25.99 ( $(\text{CH}_3)_2\text{CH}$ ), 27.30 ( $(\text{CH}_3)_2\text{CH}$ ), 27.72 ( $(\text{CH}_3)_2\text{CH}$ ), 35.74 ( $\text{C-CN}$ ), 48.11 ( $(\text{CH}_3)_2\text{CH}$ ), 48.21 ( $(\text{CH}_3)_2\text{CH}$ ), 52.74 ( $\text{Sc-N=C-CH}$ ), 54.80 ( $\text{NCH}_2\text{CH}_2\text{O}$ ), 66.76 ( $\text{Sc-CH}$ ), 68.50 ( $\text{NCH}_2\text{CH}_2\text{O}$ ), 71.31 ( $\text{OCH}_2\text{CH}_2\text{O}$ ), 104.67 (Ar), 109.93 (Ar), 113.17 ( $\text{C}_5\text{Me}_5$ ), 116.55 (Ar), 121.85 (Ar), 123.05 (Ar), 124.85 (Ar), 127.01 (Ar), 128.29 (Ar), 130.49 (Ar), 132.81 (Ar), 147.61 (Ar), 150.02 (Ar), 169.92 (NCN), 170.51 (Lu-NC). Anal. Calcd for  $\text{C}_{56}\text{H}_{85}\text{KLuN}_5\text{O}_6$  of **3b-Lu**: C, 59.08; H, 7.53; N, 6.15. Found: C 59.13; H 7.58; N 6.28.

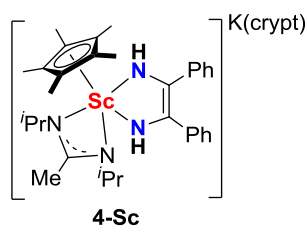

**Synthesis of 4-Sc from 1,4-cyclohexadiene:** In the glovebox, 1,4-cyclohexadiene (18.9  $\mu$ L, 0.2 mmol) was added to a THF solution of **2a-Sc** (188.7 mg, 0.2 mmol). Then this solution was warmed to room temperature and stirred at room temperature for 1 day. After that, the volatiles were removed under reduced pressure to afford blue solid. The solid was washed with  $\text{Et}_2\text{O}$  (1 mL  $\times$  3) thrice and dried under vacuum affording blue powder. This blue powder was pure enough for NMR experiment without further purification. Yield: 141.8 mg, 75%. After recrystallization by slowly diffusion of hexane into the THF solution of **4-Sc** for 3 days, the single crystals of **4-Sc $\cdot$ 0.5THF** suitable for X-ray analysis could be obtained.  $^1\text{H}$  NMR (500 MHz,  $d^8$ -THF)  $\delta$  1.15 (d,  $J$  = 6.3 Hz, 6H,  $(\text{CH}_3)_2\text{CH}$ ), 1.19 (d,  $J$  = 6.3 Hz, 6H,  $(\text{CH}_3)_2\text{CH}$ ), 1.76-1.79 (m, 2H,  $\beta$ - $\text{CH}_2$  for THF), 1.80 (s, 3H,  $\text{CCH}_3$ ), 1.94 (s, 15H,  $\text{C}_5\text{Me}_5$ ), 2.45-2.47 (m, 12H,  $\text{NCH}_2\text{CH}_2\text{O}$ ), 3.43-3.45 (m, 12H,  $\text{NCH}_2\text{CH}_2\text{O}$ ), 3.45-3.48 (m, 14H,  $(\text{CH}_3)_2\text{CH}$ ,  $\text{OCH}_2\text{CH}_2\text{O}$ ), 3.60-3.63 (m, 2H,  $\alpha$ - $\text{CH}_2$  for THF), 3.91 (br, 2H,  $\text{NH}$ ), 6.43-6.46 (m,

2H, Ph), 6.71-6.74 (m, 4H, Ph), 7.05-7.08 (m, 4H, Ph).  $^{13}\text{C}\{^1\text{H}\}$  NMR (126 MHz,  $d^8$ -THF)  $\delta$  11.43 (CCH<sub>3</sub>), 12.85 (C<sub>5</sub>Me<sub>5</sub>), 25.86 ( $\beta$ -C for THF), 26.44 ((CH<sub>3</sub>)<sub>2</sub>CH), 27.01 ((CH<sub>3</sub>)<sub>2</sub>CH), 48.31 ((CH<sub>3</sub>)<sub>2</sub>CH), 54.78 (NCH<sub>2</sub>CH<sub>2</sub>O), 68.27 ( $\alpha$ -C for THF), 68.45 (NCH<sub>2</sub>CH<sub>2</sub>O), 71.33 (OCH<sub>2</sub>CH<sub>2</sub>O), 113.54 (C<sub>5</sub>Me<sub>5</sub>), 119.86 (Ph), 127.24 (Ph), 128.32 (Ph), 131.17 (PhC), 147.12 (Ph), 167.14 (NCN). Anal. Calcd for C<sub>52</sub>H<sub>84</sub>KN<sub>6</sub>O<sub>6.5</sub>Sc of **4-Sc**·**0.5THF**: C, 63.64; H, 8.63; N, 8.56. Found: C 63.63; H 8.85; N 8.66.

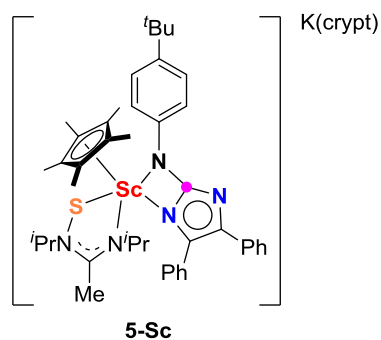

**Synthesis 5-Sc:** In the glovebox, 4-*tert*-butylphenyl isothiocyanate (38.5 mg, 0.2 mmol) was added to a THF solution of **2a-Sc** (188.7 mg, 0.2 mmol) at  $-35^\circ\text{C}$  and the reaction mixture gradually turned to yellow. Then this solution was warmed to room temperature and stirred for 1 h. After that, the volatiles were removed under reduced pressure to afford yellow solid. The solid was washed with Et<sub>2</sub>O (1 mL  $\times$  3) thrice.

This yellow powder was pure enough for NMR experiment without further purification. Yield: 145.4 mg, 64%.  $^1\text{H}$  NMR (500 MHz,  $d^8$ -THF)  $\delta$  0.31 (br, 3H, (CH<sub>3</sub>)<sub>2</sub>CH), 1.14 (d,  $J = 6.5$  Hz, 6H, (CH<sub>3</sub>)<sub>2</sub>CH), 1.27 (s, 9H, (CH<sub>3</sub>)<sub>3</sub>C), 1.38 (d,  $J = 6.3$  Hz, 3H, (CH<sub>3</sub>)<sub>2</sub>CH), 1.95 (s, 15H, C<sub>5</sub>Me<sub>5</sub>), 2.01 (s, 3H, CCH<sub>3</sub>), 2.30-2.32 (m, 12H, NCH<sub>2</sub>CH<sub>2</sub>O), 3.28-3.30 (m, 12H, NCH<sub>2</sub>CH<sub>2</sub>O), 3.36 (s, 12H, OCH<sub>2</sub>CH<sub>2</sub>O), 3.80-3.87 (m, 1H, (CH<sub>3</sub>)<sub>2</sub>CH), 4.05-4.11 (m, 1H, (CH<sub>3</sub>)<sub>2</sub>CH), 6.69-6.72 (m, 1H, Ar), 6.91-6.95 (m, 4H, Ar), 7.01-7.04 (m, 1H, Ar), 7.15-7.18 (t,  $J = 7.5$  Hz, 2H, Ar), 7.50-7.62 (m, 4H, Ar), 7.66-7.68 (m, 2H, Ar).  $^{13}\text{C}\{^1\text{H}\}$  NMR (126 MHz,  $d^8$ -THF)  $\delta$  12.73 (C<sub>5</sub>Me<sub>5</sub>), 18.37 (CCH<sub>3</sub>), 21.39 ((CH<sub>3</sub>)<sub>2</sub>CH), 23.04 ((CH<sub>3</sub>)<sub>2</sub>CH), 23.68 ((CH<sub>3</sub>)<sub>2</sub>CH), 24.64 ((CH<sub>3</sub>)<sub>2</sub>CH), 32.72 ((CH<sub>3</sub>)<sub>3</sub>C), 34.33 ((CH<sub>3</sub>)<sub>3</sub>C), 46.16 ((CH<sub>3</sub>)<sub>2</sub>CH), 51.89 ((CH<sub>3</sub>)<sub>2</sub>CH), 54.72 (NCH<sub>2</sub>CH<sub>2</sub>O), 68.55 (NCH<sub>2</sub>CH<sub>2</sub>O), 71.26 (OCH<sub>2</sub>CH<sub>2</sub>O), 118.16 (C<sub>5</sub>Me<sub>5</sub>), 119.30 (Ar), 122.28 (Ar), 124.10 (Ar), 124.68 (Ar), 127.37 (Ar), 127.46 (Ar), 127.77 (Ar), 130.49 (Ar), 131.07 (Ar), 133.31 (Ar), 133.41 (Ar), 141.25 (Ar), 141.64 (PhC), 150.70 (PhC), 160.37 (ArNCN), 165.04 (*i*PrNCN*i*Pr). After recrystallization by slowly diffusion of hexane into the THF solution of **5-Sc** for 3 days, the single crystals of **5-Sc**·THF suitable for X-ray analysis could be obtained. Anal. Calcd for C<sub>65</sub>H<sub>99</sub>KN<sub>7</sub>O<sub>7</sub>SSc of **5-Sc**·THF: C, 64.70; H, 8.27; N, 8.13. Found: C, 64.61; H, 8.38; N, 8.42.

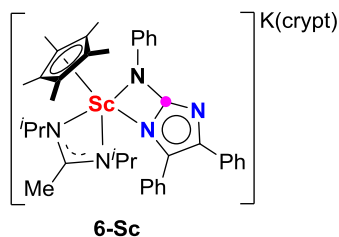

**Synthesis of 6-Sc:** In the glovebox, PhNC (22  $\mu$ L, 0.2 mmol) was added to a THF solution of **2a-Sc** (188.7 mg, 0.2 mmol) at  $-35$   $^{\circ}$ C and the reaction mixture gradually turned to brown. Then this solution was warmed to room temperature and stirred for 1 h. After that, the volatiles were removed under reduced pressure to afford

brown solid. The solid was collected and washed with Et<sub>2</sub>O (1 mL  $\times$  3) thrice. This brown powder was pure enough for NMR experiment without further purification. Yield: 150.7 mg, 72%. <sup>1</sup>H NMR (500 MHz, *d*<sup>8</sup>-THF)  $\delta$  0.57 (d, *J* = 6.5 Hz, 3H, (CH<sub>3</sub>)<sub>2</sub>CH), 0.78 (d, *J* = 7.5 Hz, 3H, (CH<sub>3</sub>)<sub>2</sub>CH), 0.89 (d, *J* = 6.6 Hz, 3H, (CH<sub>3</sub>)<sub>2</sub>CH), 1.12-1.14 (m, 3H, (CH<sub>3</sub>)<sub>2</sub>CH), 1.80 (s, 3H, CCH<sub>3</sub>), 2.04 (s, 15H, C<sub>5</sub>Me<sub>5</sub>), 2.37-2.38 (m, 12H, NCH<sub>2</sub>CH<sub>2</sub>O), 3.23 (br, 1H, (CH<sub>3</sub>)<sub>2</sub>CH), 3.35-3.37 (m, 12H, NCH<sub>2</sub>CH<sub>2</sub>O), 3.41 (s, 12H, OCH<sub>2</sub>CH<sub>2</sub>O), 3.81 (br, 1H, (CH<sub>3</sub>)<sub>2</sub>CH), 6.15 (t, *J* = 7.0 Hz, 1H, Ph), 6.71 (t, *J* = 7.2 Hz, 1H, Ph), 6.85-6.88 (m, 2H, Ph), 6.92-6.98 (m, 3H, Ph), 7.12 (t, *J* = 7.5 Hz, 2H, Ph), 7.64 (t, *J* = 8.5 Hz, 4H, Ph), 7.77-7.78 (m, 2H, Ar). <sup>13</sup>C{<sup>1</sup>H} NMR (126 MHz, *d*<sup>8</sup>-THF)  $\delta$  12.44 (C<sub>5</sub>Me<sub>5</sub>), 16.59 (CCH<sub>3</sub>), 25.46 ((CH<sub>3</sub>)<sub>2</sub>CH), 25.62 ((CH<sub>3</sub>)<sub>2</sub>CH), 25.86 ((CH<sub>3</sub>)<sub>2</sub>CH), 47.82 ((CH<sub>3</sub>)<sub>2</sub>CH), 47.38 ((CH<sub>3</sub>)<sub>2</sub>CH), 54.74 (NCH<sub>2</sub>CH<sub>2</sub>O), 68.48 (NCH<sub>2</sub>CH<sub>2</sub>O), 71.29 (OCH<sub>2</sub>CH<sub>2</sub>O), 112.00 (Ph), 113.66 (Ph), 117.61 (C<sub>5</sub>Me<sub>5</sub>), 119.66 (Ph), 122.28 (Ph), 124.37 (Ph), 127.49 (Ph), 127.65 (Ph), 127.68 (Ph), 130.64 (Ph), 133.48 (Ph), 134.07 (Ph), 141.63 (Ph), 141.71 (PhC), 152.63 (PhC), 161.34 (PhNCN), 172.07 (NCN). The single crystals of **6-Sc** suitable for X-ray analysis could be acquired by slowly diffusion of hexane into the THF solution for 3 days. Anal. Calcd for C<sub>57</sub>H<sub>81</sub>KN<sub>7</sub>O<sub>6</sub>Sc of **6-Sc**: C, 65.55; H, 7.82; N, 9.39. Found: C, 65.12; H, 8.04; N, 9.38.

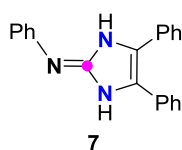

**Synthesis of 7:** Under an argon atmosphere, a THF solution **6-Sc** (104.6 mg, 0.1 mmol) was treated with NEt<sub>3</sub> HCl (55.1 mg, 0.4 mmol). The reaction mixture was stirred for 1 day at room temperature. After that, the volatiles were removed under reduced pressure to afford yellow solid. Then the crude

products were washed with hexane thrice to afford yellowish solid. The solid was extracted by ethyl acetate (5 mL). The extracts were combined and dried over MgSO<sub>4</sub> and the solvent was removed under vacuum affording yellowish oil. After that, the oil was dissolved in ethyl acetate (1 mL), evaporated onto silica and purified by column chromatography (ethyl acetate: hexane = 1:5) to yield a colorless oil. **7** is unstable at room temperature and will gradually decompose resulting in low yield. Yield: 7.8 mg, 25%. <sup>1</sup>H NMR (600 MHz, *d*<sup>6</sup>-Acetone)  $\delta$  6.84-6.88 (m, 1H, Ph), 7.22-7.28 (m, 4H, Ph), 7.30-7.33 (m, 4H, Ph), 7.55-7.56 (m, 4H, Ph), 7.66-7.68 (m, 2H, Ph), 8.06 (br, 2H, NH). <sup>13</sup>C{<sup>1</sup>H} NMR (126 MHz, *d*<sup>6</sup>-Acetone)  $\delta$  117.01 (Ph), 120.72 (Ph),

127.41 (Ph), 128.33 (Ph), 129.15, (Ph), 129.64 (Ph), 130.18 (Ph), 143.13 (Ph), 146.34 (PhC=NH), 172.44 (PhN=C). HRMS ( $m/z$ ):  $[M+H]^+$  calcd. for  $C_{21}H_{18}N_3$ , 312.1497; found, 312.1495.

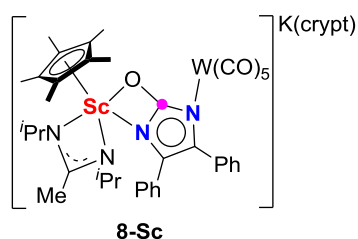

**Synthesis of 8-Sc:** In the glovebox,  $W(CO)_6$  (70.4 mg, 0.2 mmol) was added to a THF solution of **2a-Sc** (188.7 mg, 0.2 mmol) at  $-35\text{ }^\circ\text{C}$  and the reaction mixture gradually turned to yellow. Then this solution was warmed to room temperature and stirred for 1 h. After that, the volatiles were removed under

reduced pressure to afford yellow solid. The solid was collected and washed with  $Et_2O$  (1 mL  $\times$  3) thrice. This yellow powder was pure enough for NMR experiment without further purification. Yield: 176.1 mg, 68%.  $^1H$  NMR (500 MHz,  $d^8$ -THF)  $\delta$  0.97-1.12 (m, 6H,  $(CH_3)_2CH$ ), 1.19 (d,  $J = 6.5$  Hz, 6H,  $(CH_3)_2CH$ ), 1.89 (s, 3H,  $CCH_3$ ), 1.96 (s, 15H,  $C_5Me_5$ ), 2.53-2.55 (m, 12H,  $NCH_2CH_2O$ ), 3.44-3.49 (m, 2H,  $(CH_3)_2CH$ ), 3.51-3.53 (m, 12H,  $NCH_2CH_2O$ ), 3.57 (s, 12H,  $OCH_2CH_2O$ ), 6.75-6.78 (m, 1H, Ph), 6.89-6.92 (m, 2H, Ph), 7.13-7.16 (m, 1H, Ph), 7.17-7.21 (m, 4H, Ph), 7.30-7.32 (m, 2H, Ph).  $^{13}C\{^1H\}$  NMR (126 MHz,  $d^8$ -THF)  $\delta$  12.29 ( $C_5Me_5$ ), 12.66 ( $CCH_3$ ), 25.86 ( $(CH_3)_2CH$ ), 25.99 ( $(CH_3)_2CH$ ), 48.44 ( $(CH_3)_2CH$ ), 54.84 ( $NCH_2CH_2O$ ), 68.52 ( $NCH_2CH_2O$ ), 71.37 ( $OCH_2CH_2O$ ), 118.28 ( $C_5Me_5$ ), 123.50 (Ph), 126.67 (Ph), 127.42 (Ph), 128.05 (Ph), 128.17 (Ph), 129.92 (Ph), 133.37 (Ph), 135.03 (Ph), 138.48 (OCN), 141.03 (PhC), 168.72 (PhC), 172.07 (NCN), 200.83 (CO), 205.10 (CO). The single crystals of **8-Sc** $\cdot$ THF suitable for X-ray analysis could be acquired by slowly diffusion of hexane into the THF solution for 3 days. Anal. Calcd for  $C_{60}H_{86}KN_6O_{13}ScW$  of **8-Sc** $\cdot$ THF: C, 52.71; H, 6.34; N, 6.15. Found: C, 52.22; H, 6.20; N, 6.51.

## 2) Possible Mechanisms for the Formation of 5-Sc and 6-Sc.

The formation of **5-Sc** is proposed to proceed as described in **Scheme S1**, where initially the insertion of C=N bond into the Sc–N bond occurs, giving **IM4**. Then, **IM4** undergoes intramolecular nucleophilic attack giving the spiro complex **IM5**. The nitrogen of the amidinate then nucleophilically attacks the sulfur atom giving the final product **5-Sc**.



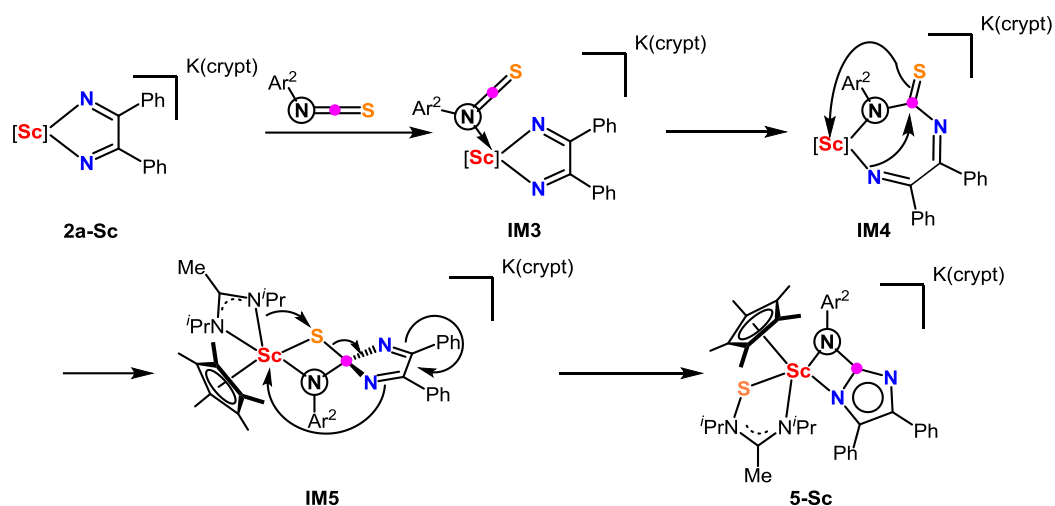

**Scheme S1.** The proposed mechanism for the formation of **5-Sc**.

The formation of **6-Sc** includes three possible steps (Scheme S2): the initial 1,1-insertion of PhNC into Sc–N bond affording **IM6**; the subsequently nucleophilic attack of the Sc–N bond on the C=N double bond providing a strained spiro metallacycle **IM7**, followed by intramolecular rearrangement giving **6-Sc**.

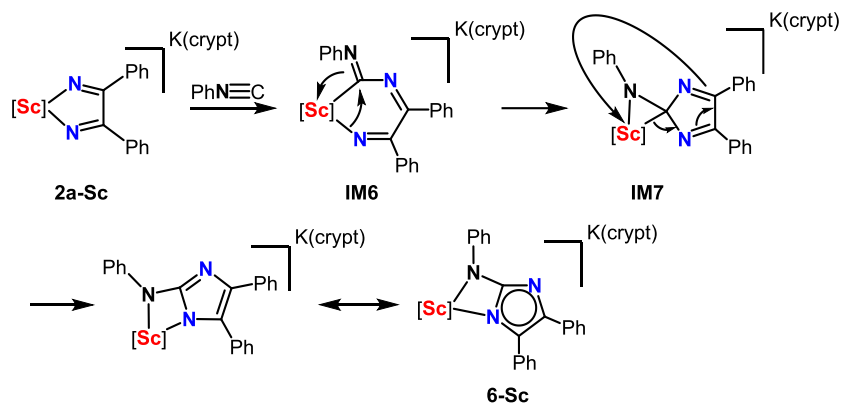

**Scheme S2.** The proposed mechanism for the formation of **6-Sc**

### 3) Copies of $^1\text{H}$ NMR and $^{13}\text{C}\{^1\text{H}\}$ NMR Spectra

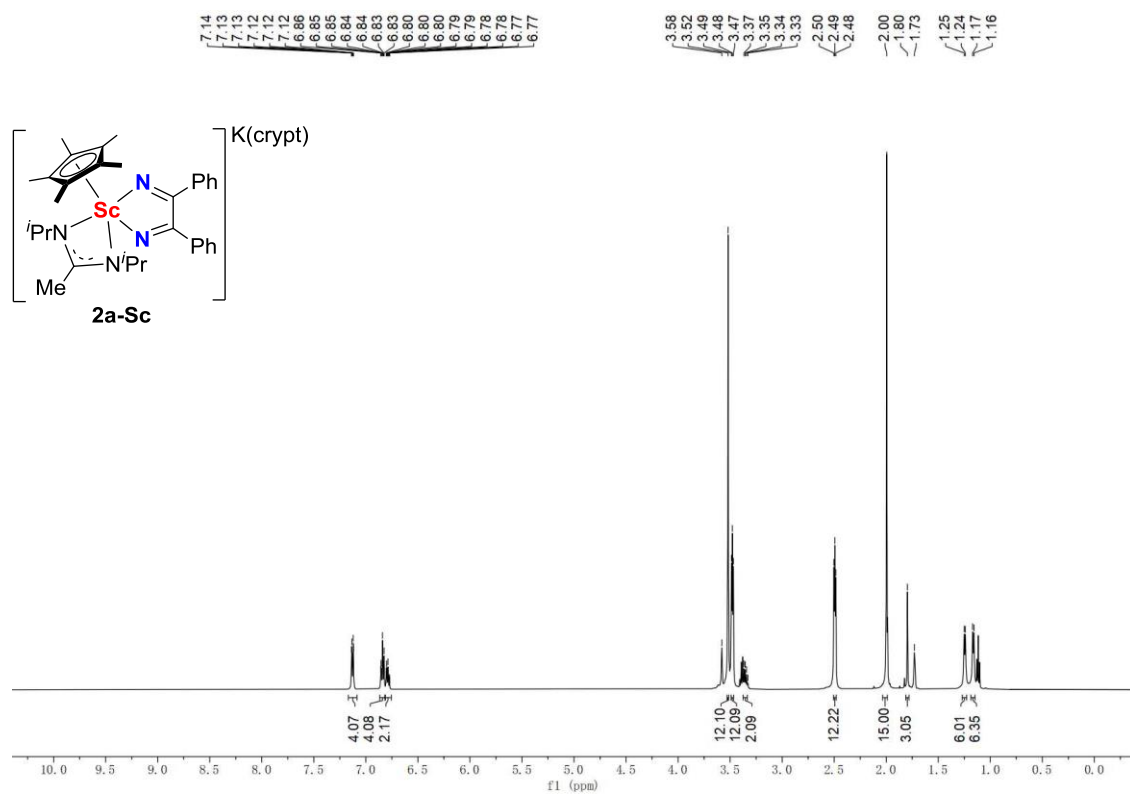

**Figure S1.**  $^1\text{H}$  NMR spectrum of **2a-Sc** (25 °C, 500 MHz,  $d^8$ -THF).

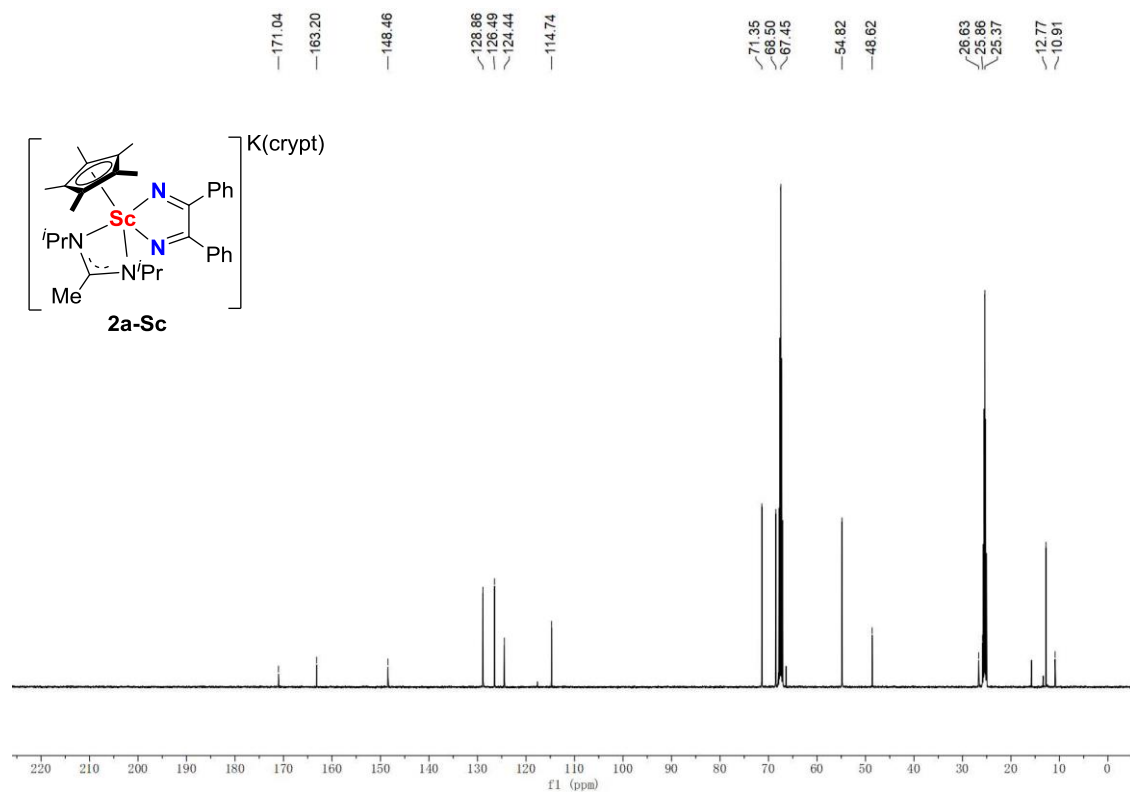

**Figure S2.**  $^{13}\text{C}\{^1\text{H}\}$  NMR spectrum of **2a-Sc** (25 °C, 126 MHz,  $d^8$ -THF).

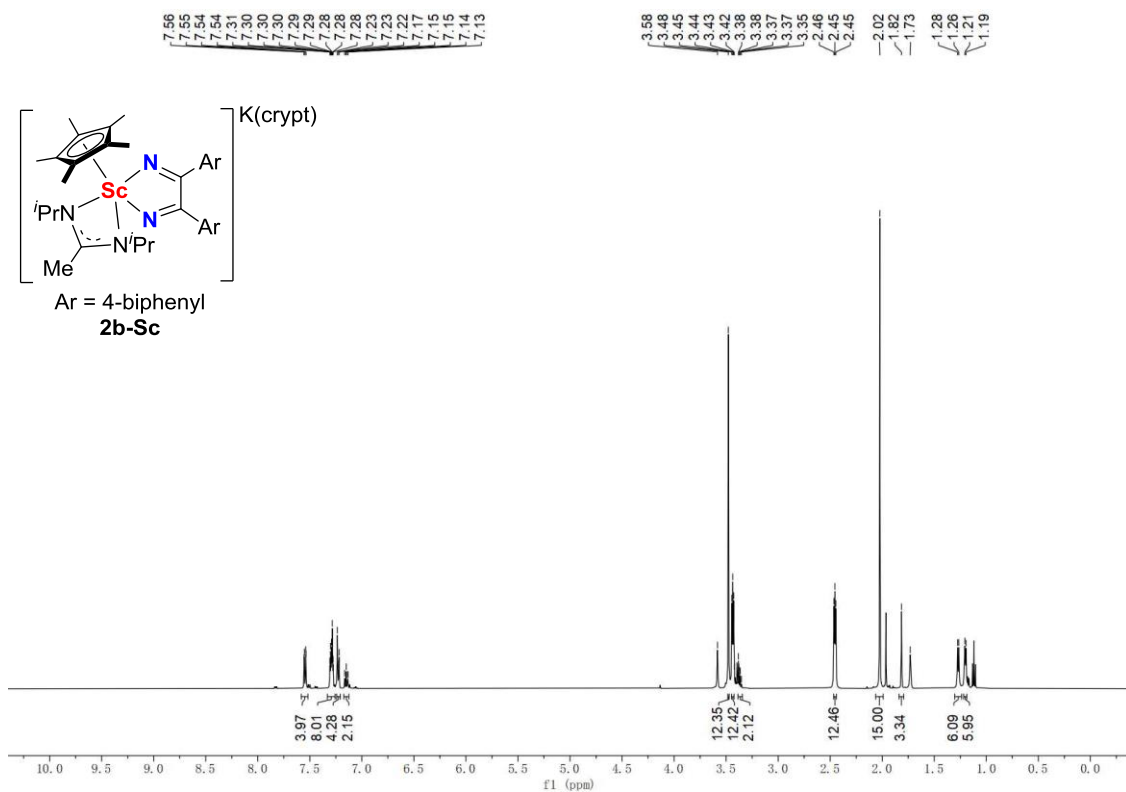

**Figure S3.**  $^1\text{H}$  NMR spectrum of **2b-Sc** (25 °C, 500 MHz,  $d^8$ -THF).

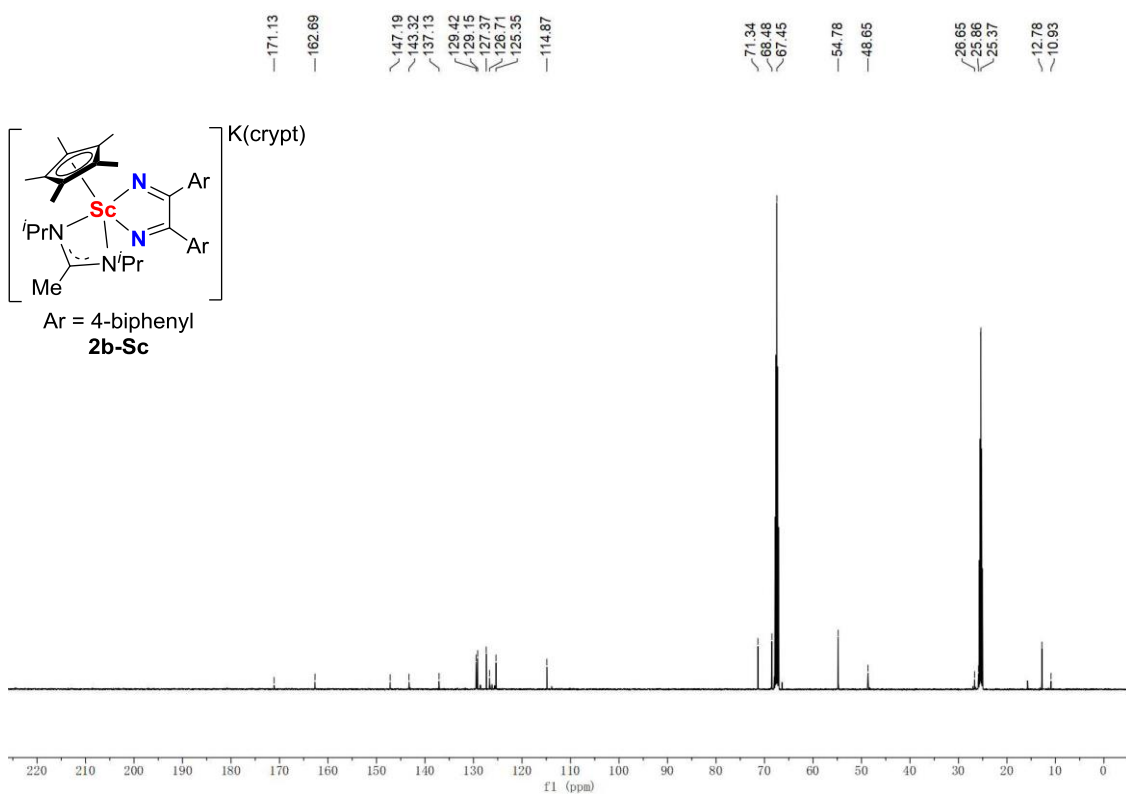

**Figure S4.**  $^{13}\text{C}\{^1\text{H}\}$  NMR spectrum of **2b-Sc** (25 °C, 126 MHz,  $d^8$ -THF).

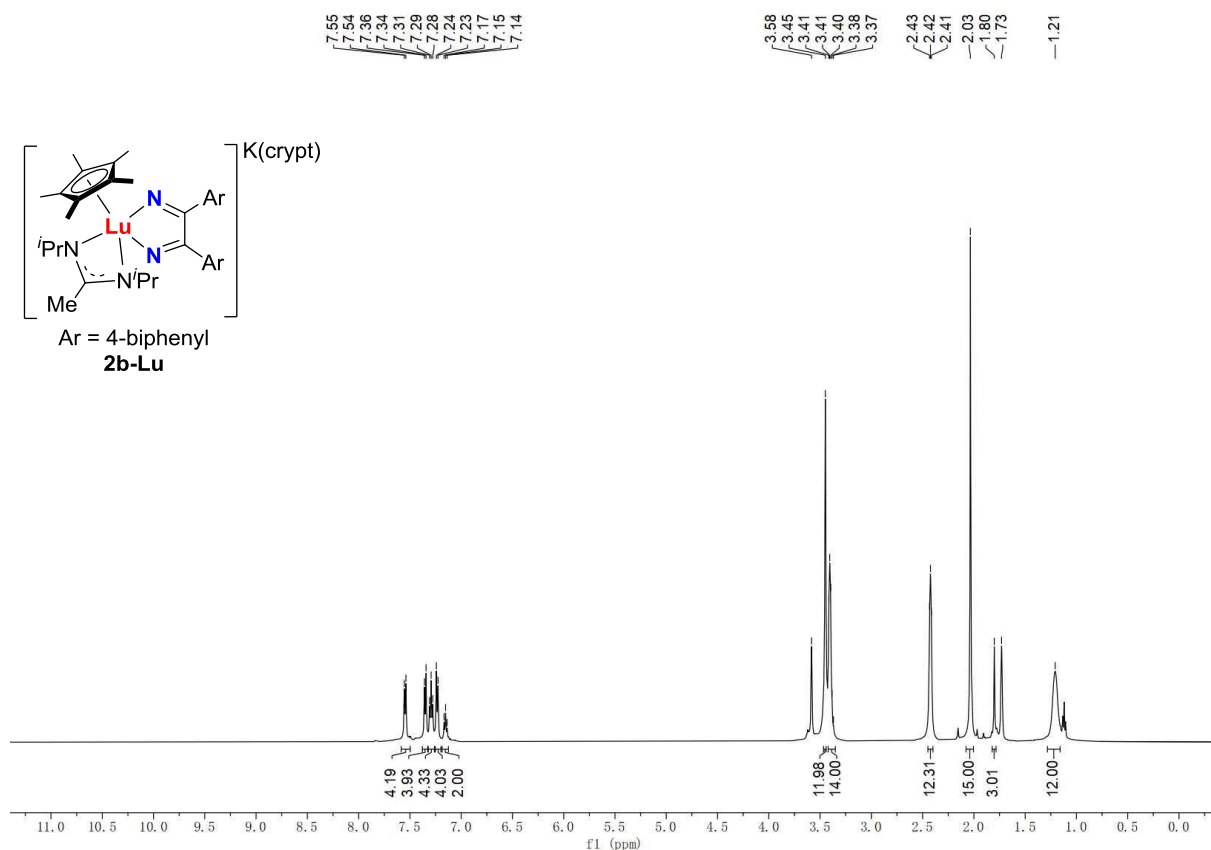

Figure S5.  $^1\text{H}$  NMR spectrum of **2b-Lu** (25 °C, 500 MHz,  $d^8$ -THF).

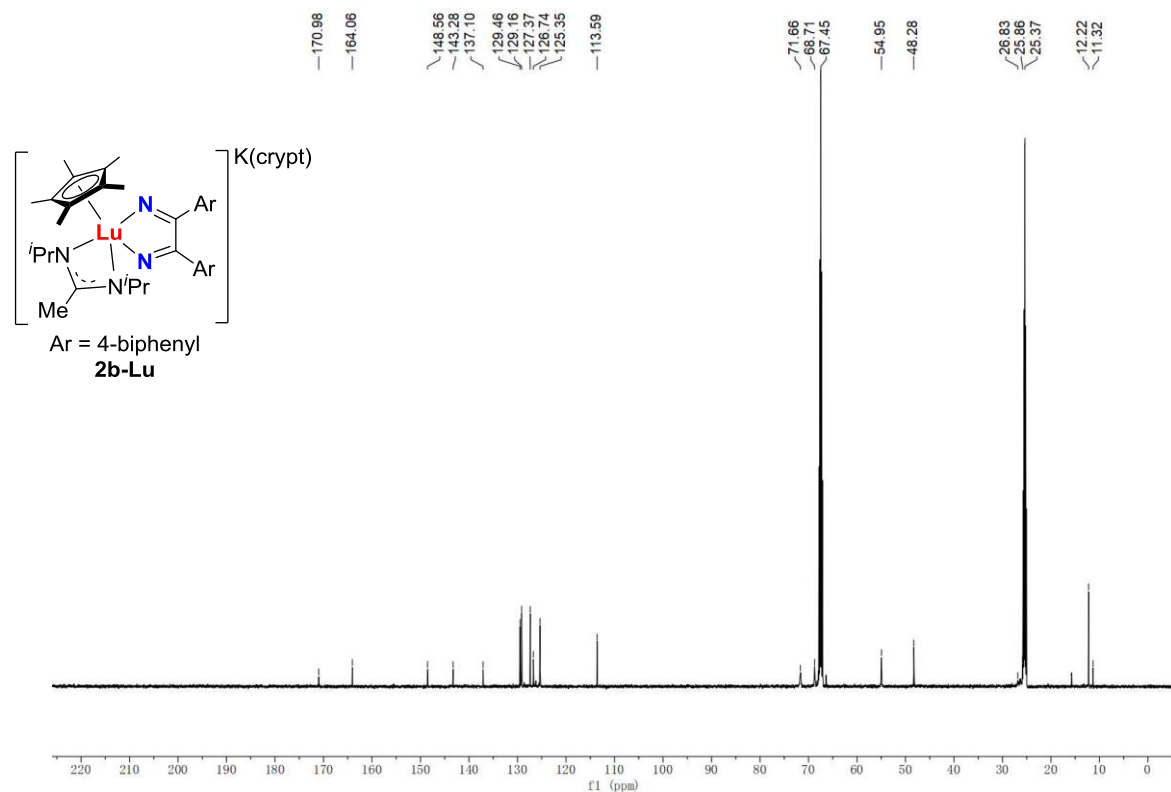

Figure S6.  $^{13}\text{C}\{^1\text{H}\}$  NMR spectrum of **2b-Lu** (25 °C, 126 MHz,  $d^8$ -THF).

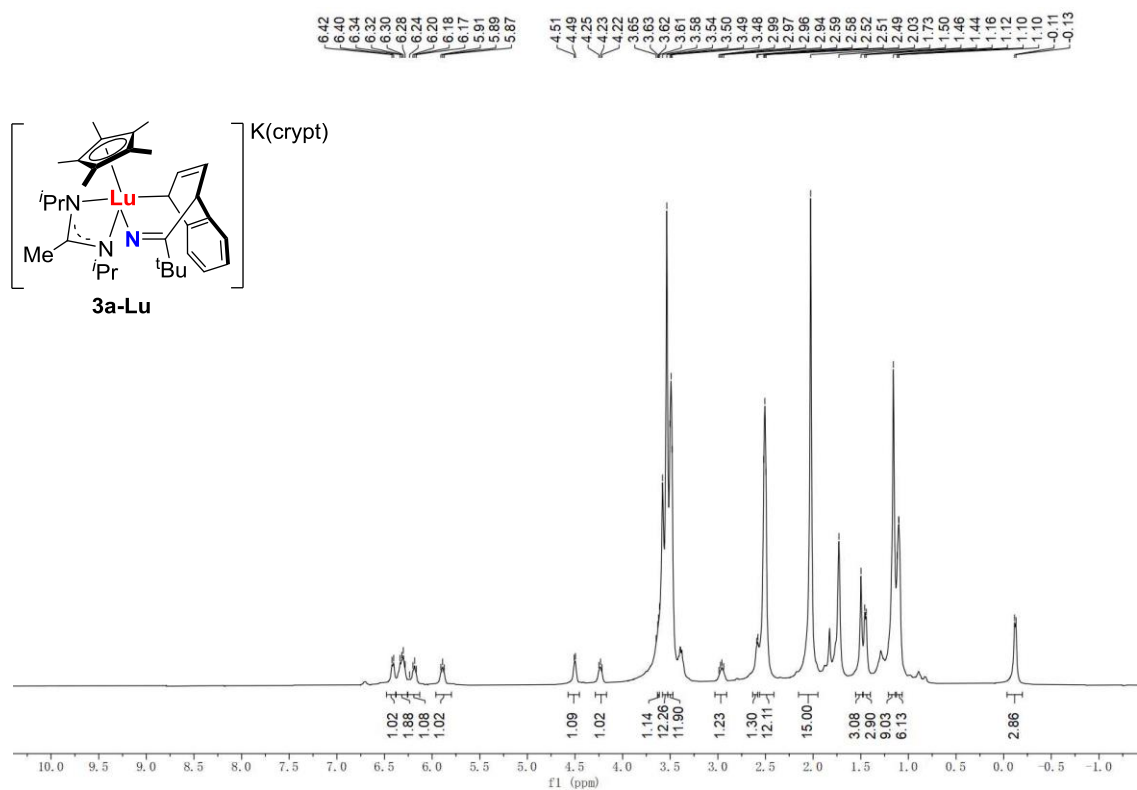

**Figure S7.**  $^1\text{H}$  NMR spectrum of **3a-Lu** (25 °C, 600 MHz,  $d^8$ -THF).

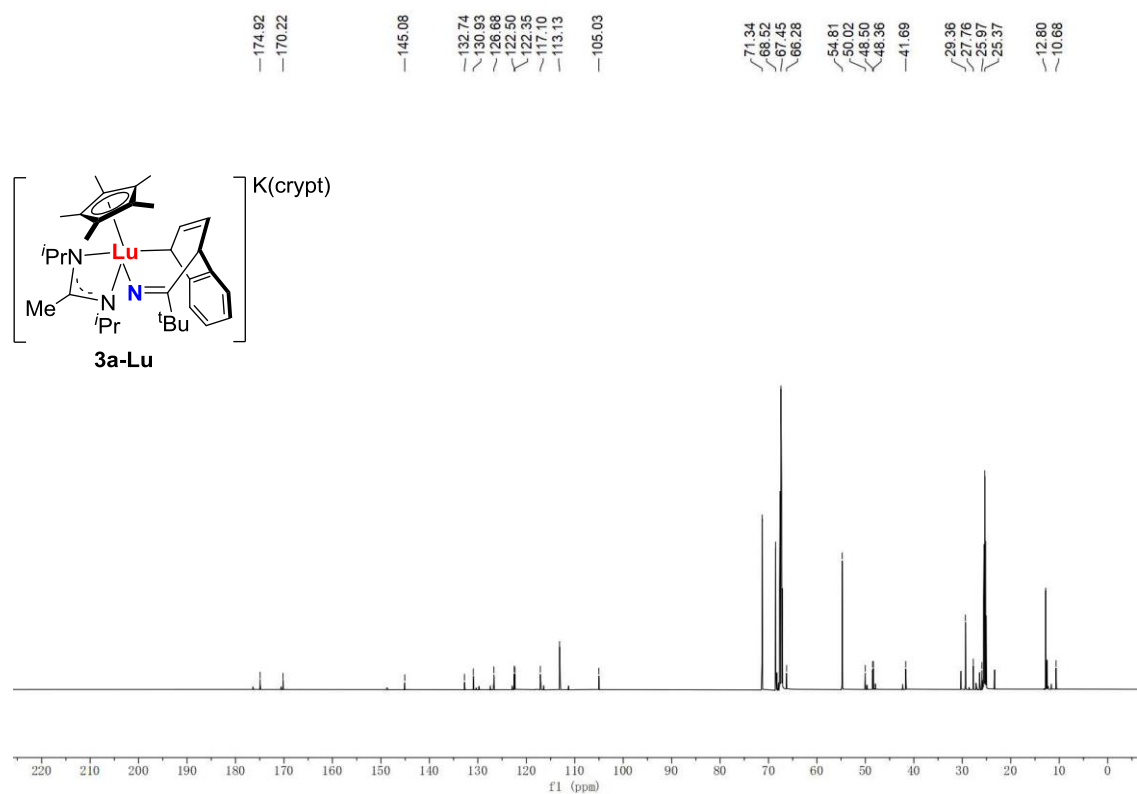

**Figure S8.**  $^{13}\text{C}\{^1\text{H}\}$  NMR spectrum of **3a-Lu** (25 °C, 151 MHz,  $d^8$ -THF).

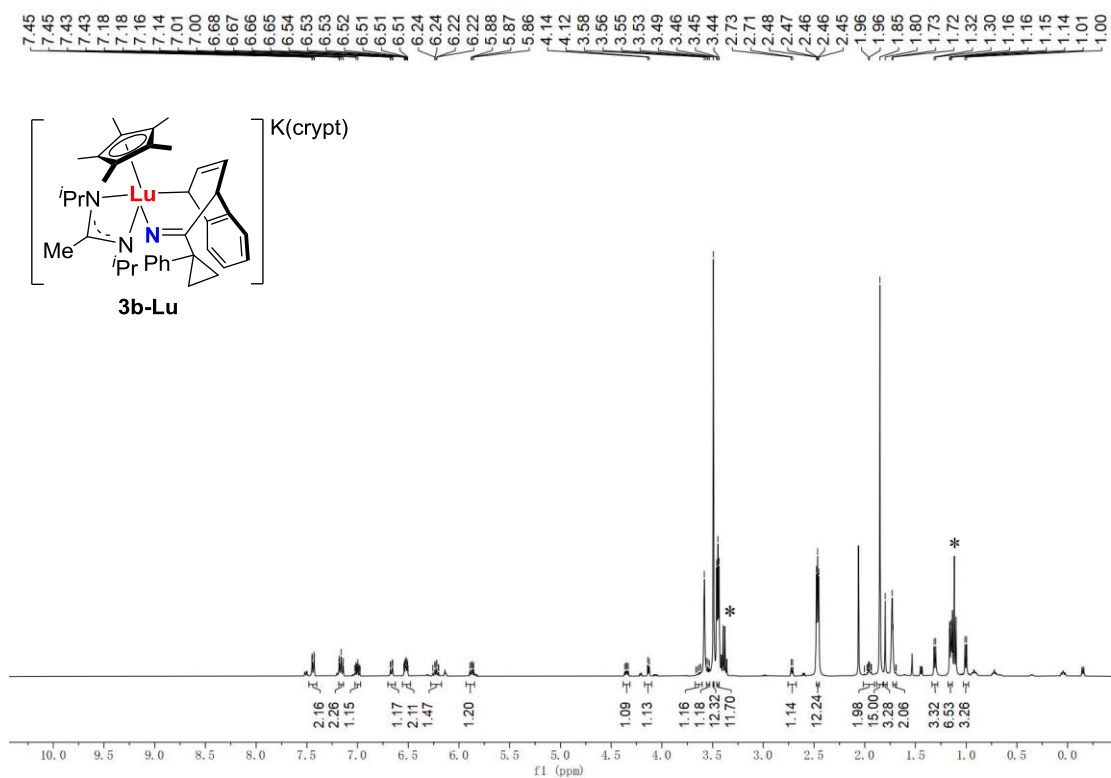

**Figure S9.** <sup>1</sup>H NMR spectrum of **3b-Lu** (25 °C, 400 MHz, *d*<sup>8</sup>-THF, “\*”) represents the residual Et<sub>2</sub>O).

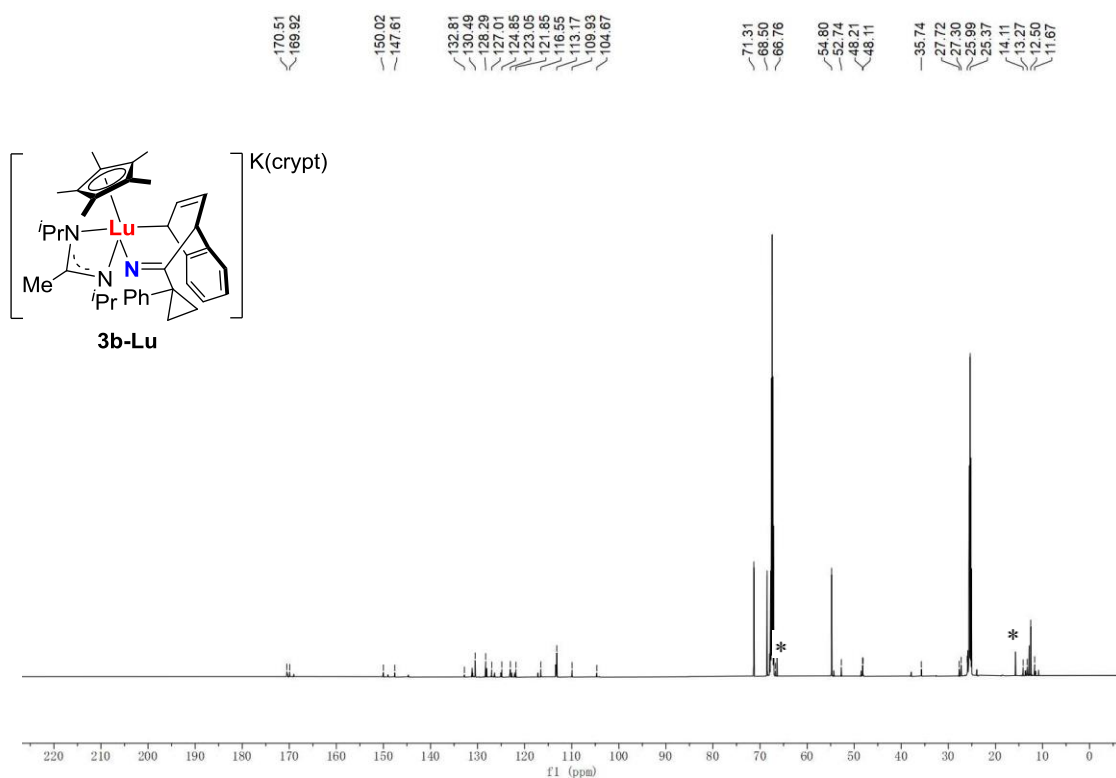

**Figure S10.** <sup>13</sup>C{<sup>1</sup>H} NMR spectrum of **3b-Lu** (25 °C, 151 MHz, *d*<sup>8</sup>-THF, “\*”) represents the residual Et<sub>2</sub>O).

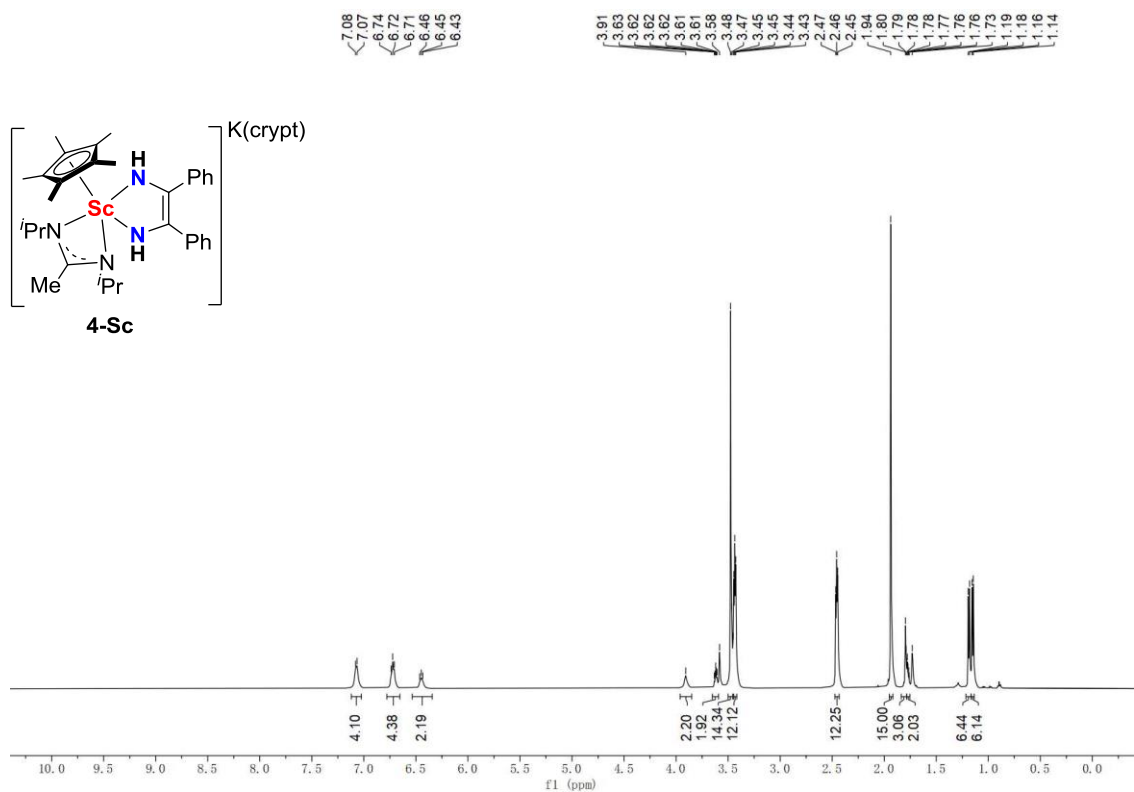

**Figure S11.**  $^1\text{H}$  NMR spectrum of **4-Sc·0.5THF** (25 °C, 500 MHz,  $d^8$ -THF).

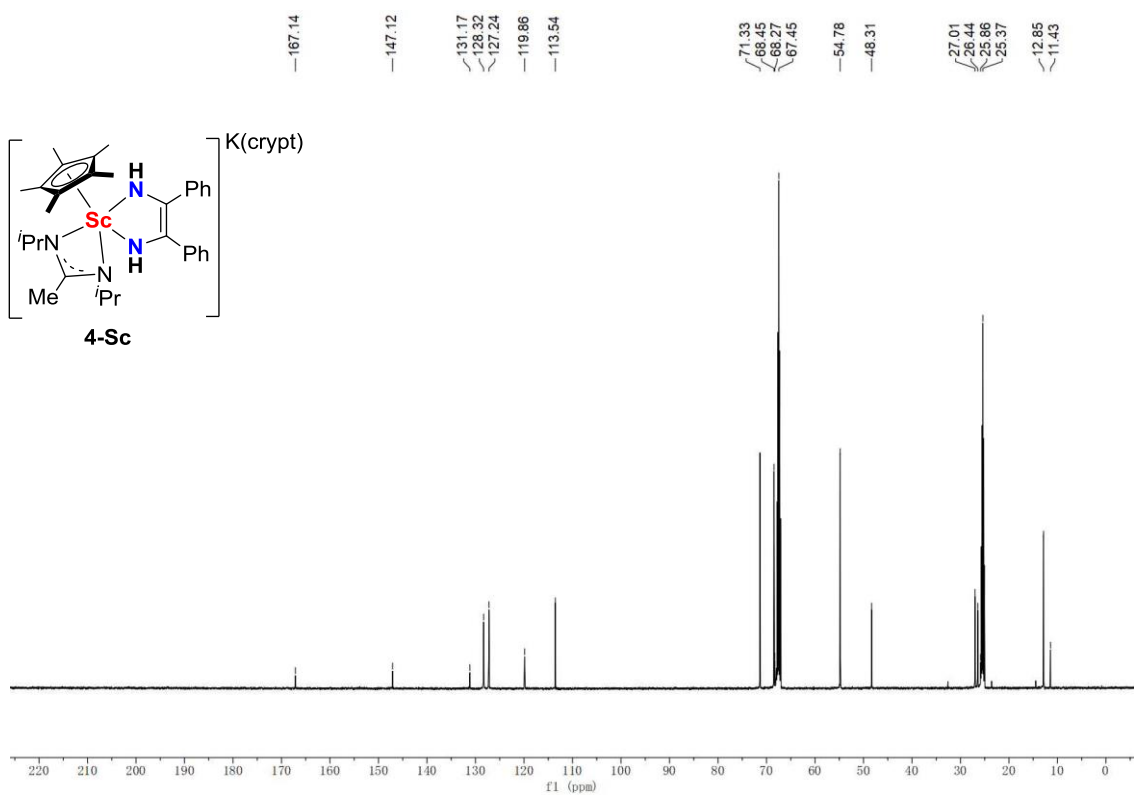

**Figure S12.**  $^{13}\text{C}\{^1\text{H}\}$  NMR spectrum of **4-Sc·0.5THF** (25 °C, 126 MHz,  $d^8$ -THF).

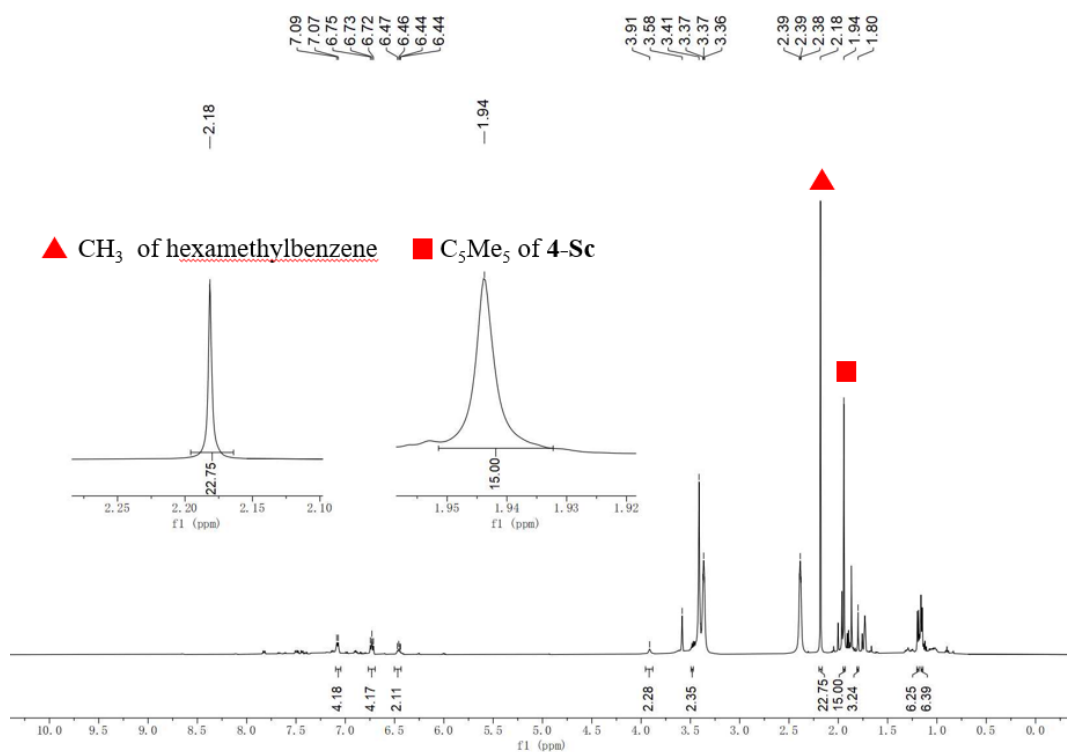

**Figure S13.** *In situ* <sup>1</sup>H NMR of the reaction of **2a-Sc** and H<sub>2</sub>/N<sub>2</sub> (25 °C, 500 MHz, *d*<sup>8</sup>-THF).

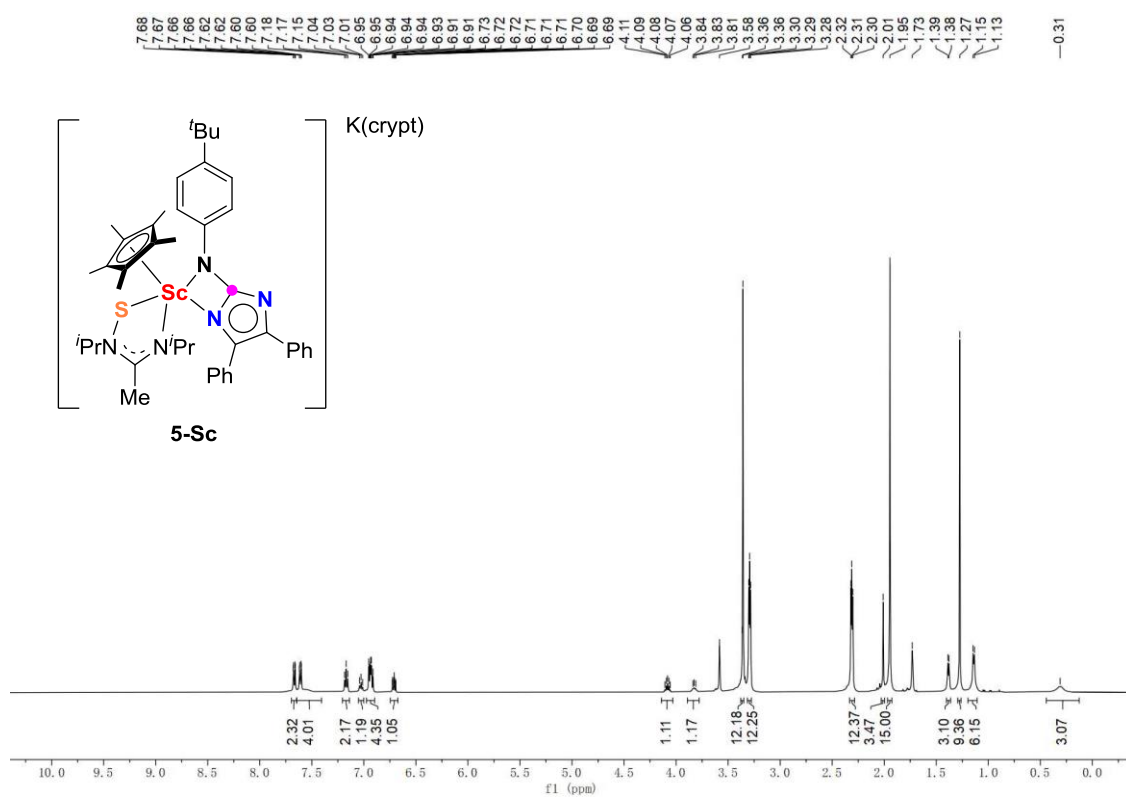

**Figure S14.** <sup>1</sup>H NMR spectrum of **5-Sc** (25 °C, 500 MHz, *d*<sup>8</sup>-THF).



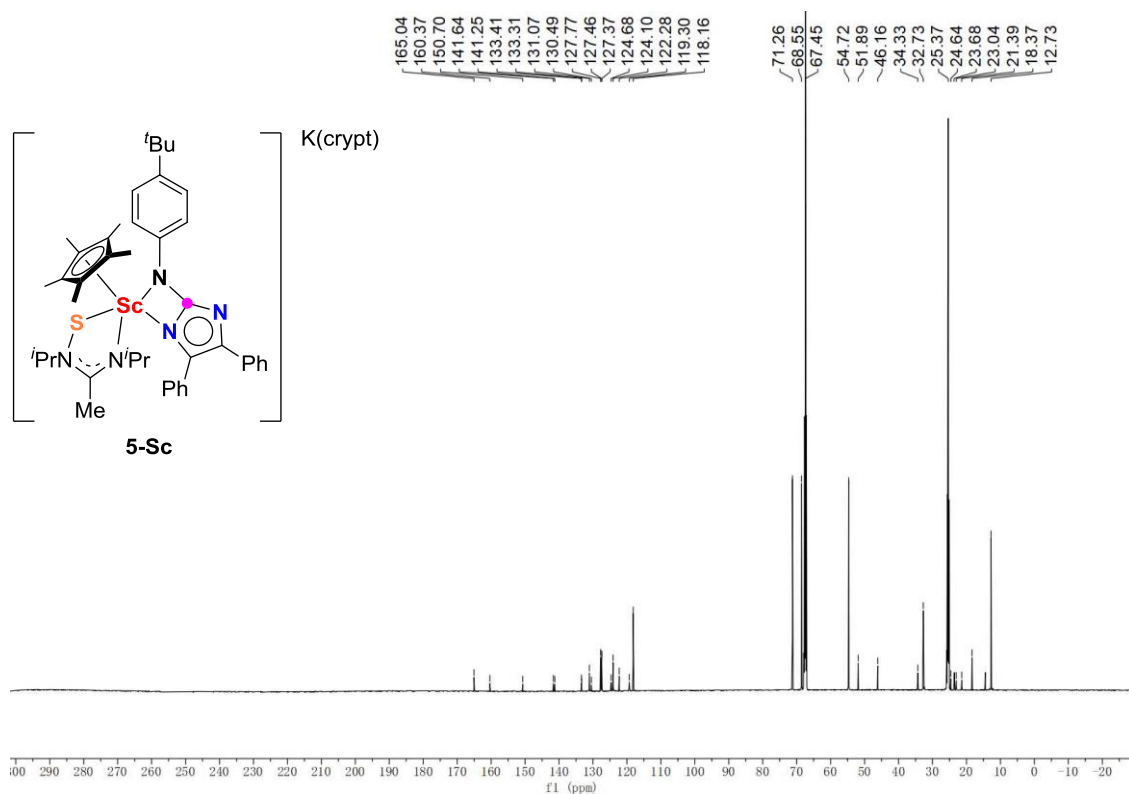

**Figure S15.**  $^{13}\text{C}\{^1\text{H}\}$  NMR spectrum of **5-Sc** (25 °C, 151 MHz,  $d^8$ -THF).

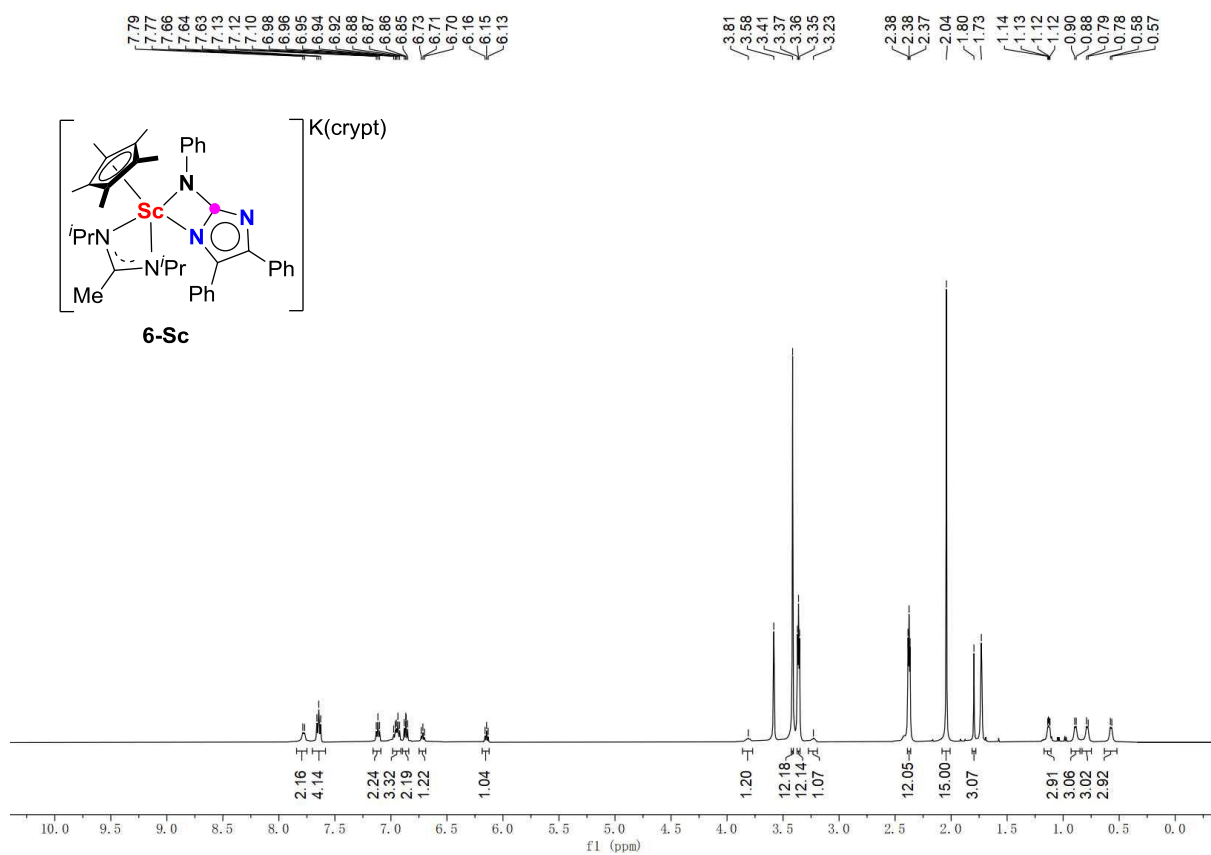

**Figure S16.**  $^1\text{H}$  NMR spectrum of **6-Sc** (25 °C, 500 MHz,  $d^8$ -THF).

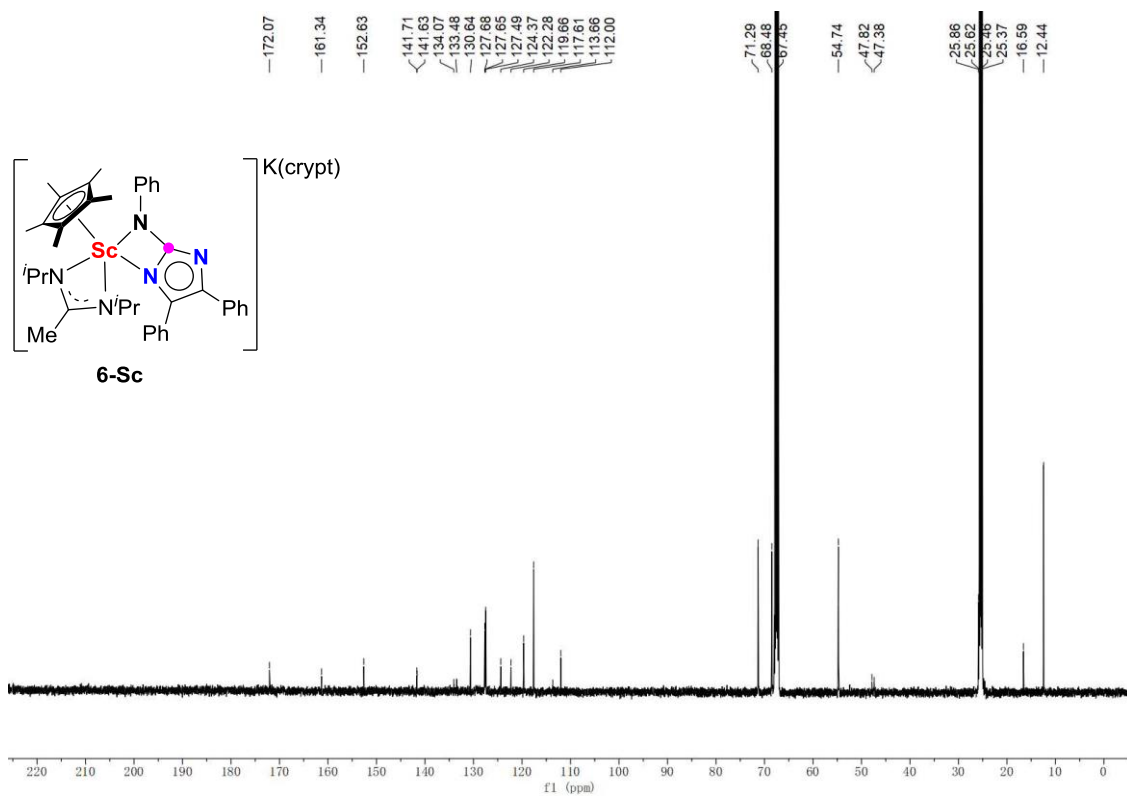

**Figure S17.**  $^{13}\text{C}\{^1\text{H}\}$  NMR spectrum of **6-Sc** (25 °C, 126 MHz,  $d^8$ -THF).

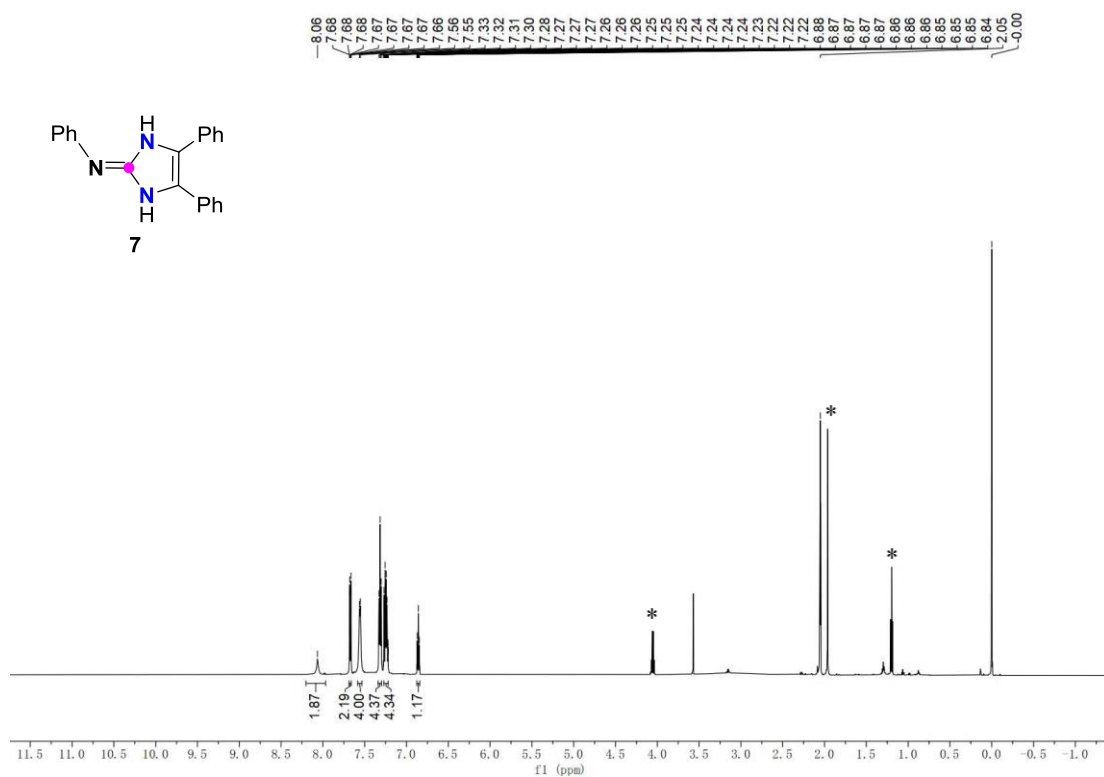

**Figure S18.**  $^1\text{H}$  NMR spectrum of **7** (25 °C, 600 MHz,  $d^6$ -Acetone, “\*” represents the residual ethyl acetate).

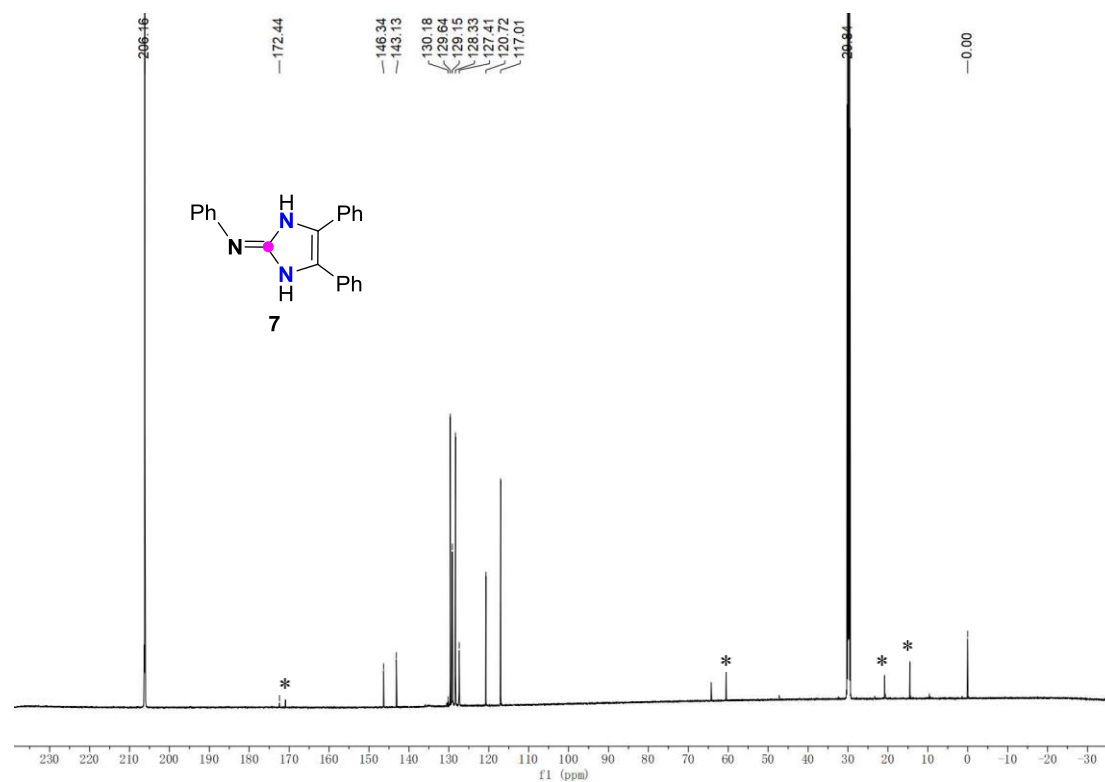

**Figure S19.**  $^{13}\text{C}\{^1\text{H}\}$  NMR spectrum of **7** (25 °C, 126 MHz,  $d^6$ -Acetone, “\*”) represents the residual ethyl acetate).

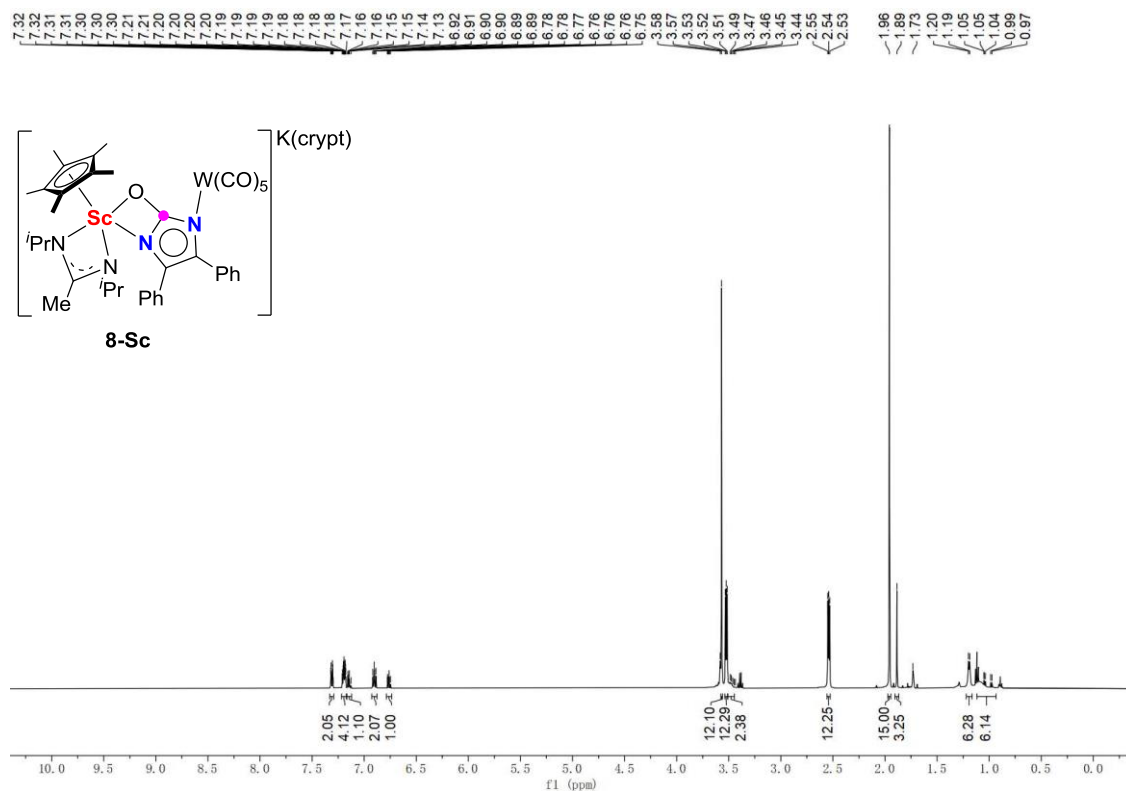

**Figure S20.**  $^1\text{H}$  NMR spectrum of **8-Sc** (25 °C, 500 MHz,  $d^8$ -THF).

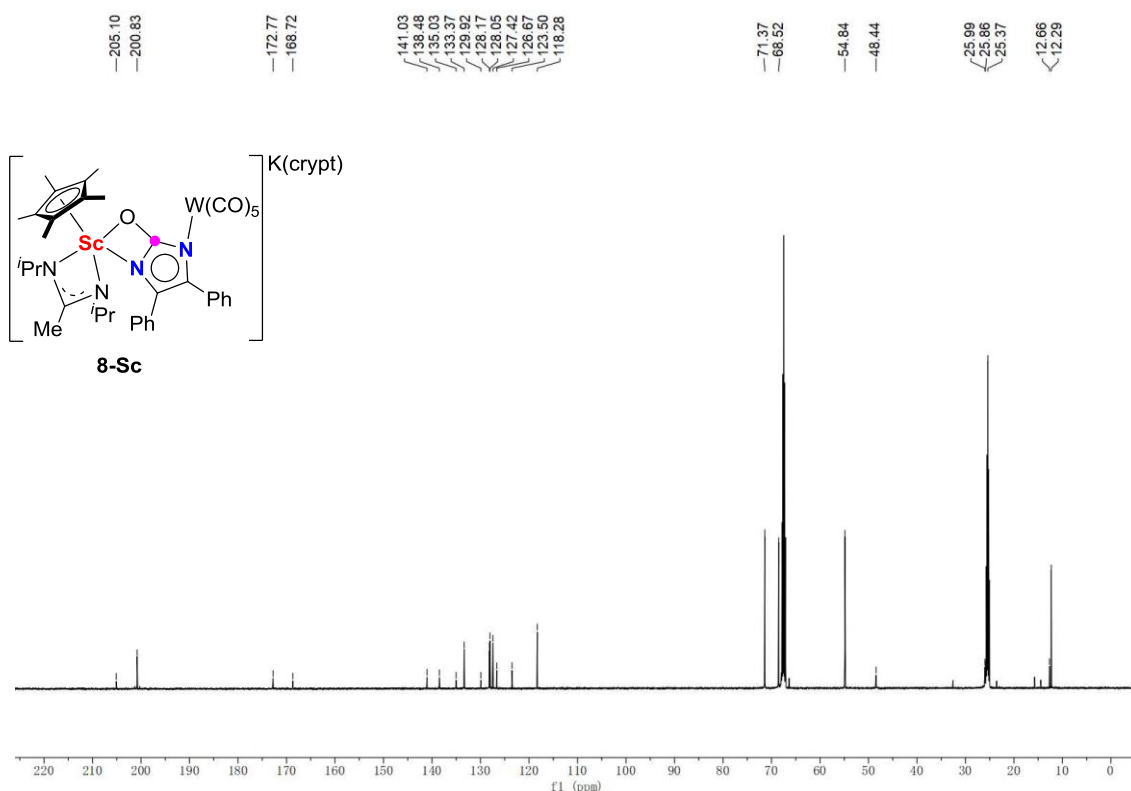

**Figure S21.**  $^{13}\text{C}\{^1\text{H}\}$  NMR spectrum of **8-Sc** (25 °C, 126 MHz,  $d^8$ -THF).

#### 4) X-ray Crystallographic Studies

The single crystals of **2a-Sc**, **2b-Sc·THF**, **2b-Lu·THF**, **3a-Lu**, **3b-Lu**, **4-Sc·0.5THF**, **5-Sc·THF**, **6-Sc** and **8-Sc·THF** suitable for X-ray analysis were obtained as described in the experimental details. Data collections were performed on a XtaLAB PRO 007HF(Mo): Kappa single diffractometer at 180 or 120 K. Using Olex2,<sup>3</sup> the structures were solved with Superflip<sup>4</sup> structure solution program using Charge Flipping or ShelXS-97<sup>5</sup> structure solution program using Direct Methods and refined with the ShelXL<sup>6</sup> refinement package using Least Squares minimization. Refinement was performed on  $F^2$  anisotropically for all the non-hydrogen atoms by the full-matrix least-squares method. The hydrogen atoms were placed at the calculated positions and were included in the structure calculation without further refinement of the parameters. Crystallographic data have been deposited with the Cambridge Crystallographic Data Centre with supplementary publication numbers: CCDC 2163492 (**2a-Sc**), CCDC 2163496 (**2b-Sc·THF**), CCDC 2163498 (**2b-Lu·THF**), CCDC 2163501 (**3a-Lu**), CCDC 2163502 (**3b-Lu**), CCDC 2163503 (**4-Sc·0.5THF**), CCDC 2163508 (**5-Sc·THF**), CCDC 2163510 (**6-Sc**), CCDC 2163511 (**8-Sc·THF**). These data can be obtained free of charge from the Cambridge Crystallographic Data Centre via [www.ccdc.cam.ac.uk/data\\_request/cif](http://www.ccdc.cam.ac.uk/data_request/cif).

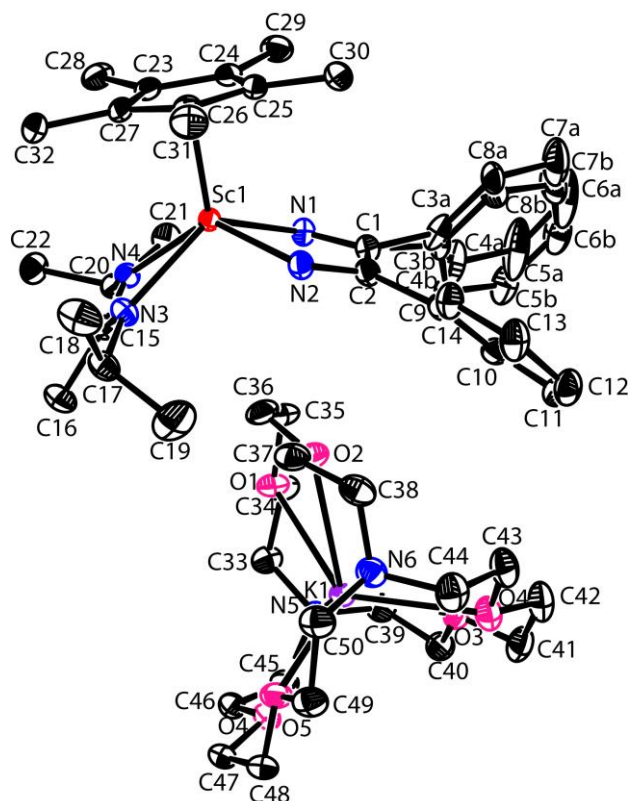

**Figure S22.** ORTEP drawing of **2a-Sc** with 30% thermal ellipsoids. H atoms are omitted for clarity.

**Table S1. Crystal data and structure refinement for 2a-Sc.**

|                                                |                                                              |
|------------------------------------------------|--------------------------------------------------------------|
| Identification code                            | <b>2a-Sc</b>                                                 |
| Empirical formula                              | $C_{50}H_{78}KN_6O_6Sc$                                      |
| Formula weight                                 | 943.24                                                       |
| Temperature/K                                  | 180.00(10)                                                   |
| Crystal system                                 | monoclinic                                                   |
| Space group                                    | $P2_1/c$                                                     |
| a/Å                                            | 16.1547(3)                                                   |
| b/Å                                            | 17.8841(4)                                                   |
| c/Å                                            | 20.0564(4)                                                   |
| $\alpha/^\circ$                                | 90                                                           |
| $\beta/^\circ$                                 | 90.467(2)                                                    |
| $\gamma/^\circ$                                | 90                                                           |
| Volume/Å <sup>3</sup>                          | 5794.3(2)                                                    |
| Z                                              | 4                                                            |
| $\rho_{\text{calc}}/\text{cm}^3$               | 1.081                                                        |
| $\mu/\text{mm}^{-1}$                           | 0.245                                                        |
| F(000)                                         | 2032.0                                                       |
| Crystal size/mm <sup>3</sup>                   | 0.2 × 0.1 × 0.1                                              |
| Radiation                                      | Mo K $\alpha$ ( $\lambda = 0.71073$ )                        |
| 2 $\theta$ range for data collection/ $^\circ$ | 3.968 to 54.968                                              |
| Index ranges                                   | $-20 \leq h \leq 20, -21 \leq k \leq 23, -25 \leq l \leq 26$ |

|                                                |                                                                   |
|------------------------------------------------|-------------------------------------------------------------------|
| Reflections collected                          | 66442                                                             |
| Independent reflections                        | 13242 [ $R_{\text{int}} = 0.0259$ , $R_{\text{sigma}} = 0.0224$ ] |
| Data/restraints/parameters                     | 13242/18/658                                                      |
| Goodness-of-fit on $F^2$                       | 1.037                                                             |
| Final R indexes [ $I \geq 2\sigma(I)$ ]        | $R_1 = 0.0359$ , $wR_2 = 0.0970$                                  |
| Final R indexes [all data]                     | $R_1 = 0.0445$ , $wR_2 = 0.1016$                                  |
| Largest diff. peak/hole / $e \text{ \AA}^{-3}$ | 0.31/-0.21                                                        |

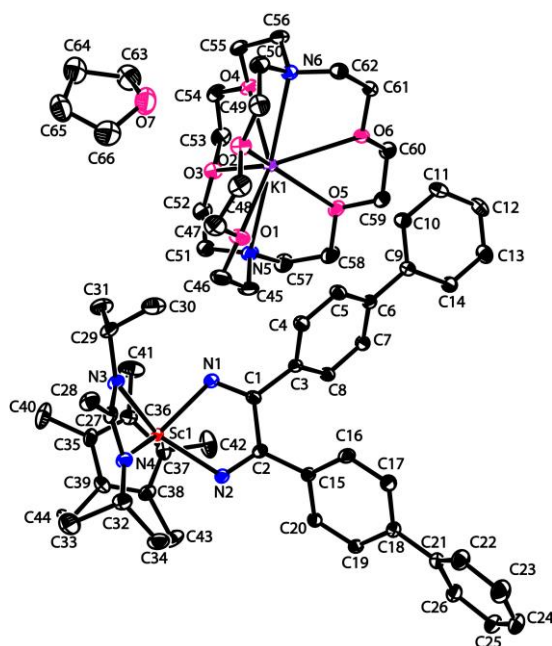

**Figure S23.** ORTEP drawing of **2b-Sc·THF**, with 30% thermal ellipsoids. H atoms are omitted for clarity.

**Table S2. Crystal data and structure refinement for 2b-Sc·THF.**

|                                  |                         |
|----------------------------------|-------------------------|
| Identification code              | <b>2b-Sc·THF</b>        |
| Empirical formula                | $C_{66}H_{94}KN_6O_7Sc$ |
| Formula weight                   | 1167.53                 |
| Temperature/K                    | 180.00(10)              |
| Crystal system                   | triclinic               |
| Space group                      | P-1                     |
| $a/\text{\AA}$                   | 11.3366(4)              |
| $b/\text{\AA}$                   | 17.1251(5)              |
| $c/\text{\AA}$                   | 18.0626(5)              |
| $\alpha/^\circ$                  | 88.915(2)               |
| $\beta/^\circ$                   | 75.361(3)               |
| $\gamma/^\circ$                  | 71.712(3)               |
| Volume/ $\text{\AA}^3$           | 3214.51(18)             |
| Z                                | 2                       |
| $\rho_{\text{calc}}/\text{cm}^3$ | 1.206                   |

|                                                |                                                                |
|------------------------------------------------|----------------------------------------------------------------|
| $\mu/\text{mm}^{-1}$                           | 0.235                                                          |
| F(000)                                         | 1256.0                                                         |
| Crystal size/ $\text{mm}^3$                    | $0.02 \times 0.01 \times 0.01$                                 |
| Radiation                                      | Mo K $\alpha$ ( $\lambda = 0.71073$ )                          |
| $2\Theta$ range for data collection/ $^\circ$  | 4.672 to 54.97                                                 |
| Index ranges                                   | $-14 \leq h \leq 14, -22 \leq k \leq 22, -23 \leq l \leq 23$   |
| Reflections collected                          | 45235                                                          |
| Independent reflections                        | 14628 [ $R_{\text{int}} = 0.0440, R_{\text{sigma}} = 0.0467$ ] |
| Data/restraints/parameters                     | 14628/0/740                                                    |
| Goodness-of-fit on $F^2$                       | 1.025                                                          |
| Final R indexes [ $I \geq 2\sigma(I)$ ]        | $R_1 = 0.0524, wR_2 = 0.1348$                                  |
| Final R indexes [all data]                     | $R_1 = 0.0710, wR_2 = 0.1453$                                  |
| Largest diff. peak/hole / $e \text{ \AA}^{-3}$ | 0.46/-0.28                                                     |

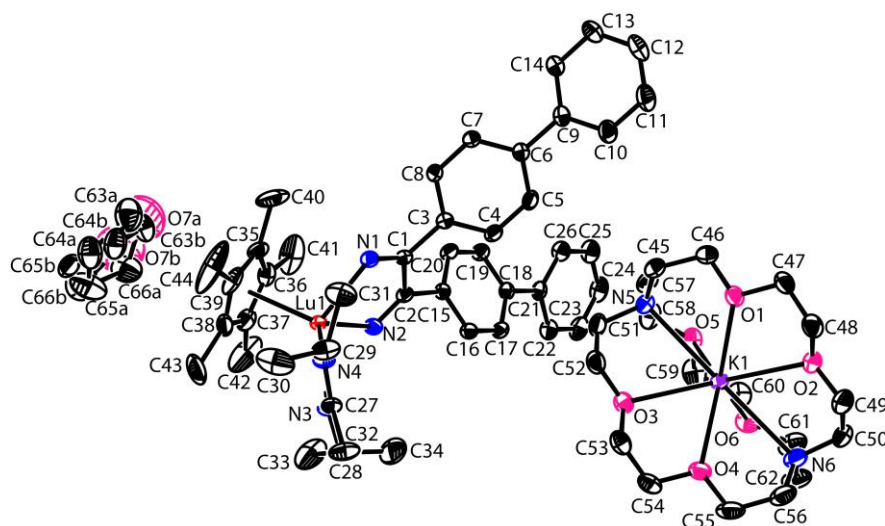

**Figure S24.** ORTEP drawing of **2b-Lu·THF** with 30% thermal ellipsoids. H atoms are omitted for clarity.

**Table S3. Crystal data and structure refinement for 2b-Lu·THF.**

|                     |                                                     |
|---------------------|-----------------------------------------------------|
| Identification code | <b>2b-Lu·THF</b>                                    |
| Empirical formula   | $\text{C}_{66}\text{H}_{94}\text{KLuN}_6\text{O}_7$ |
| Formula weight      | 1297.54                                             |
| Temperature/K       | 180.00(10)                                          |
| Crystal system      | triclinic                                           |
| Space group         | P-1                                                 |
| $a/\text{\AA}$      | 11.3091(3)                                          |
| $b/\text{\AA}$      | 16.7804(3)                                          |
| $c/\text{\AA}$      | 18.9103(4)                                          |
| $\alpha/^\circ$     | 82.925(2)                                           |
| $\beta/^\circ$      | 75.666(2)                                           |
| $\gamma/^\circ$     | 70.712(2)                                           |

|                                             |                                                                |
|---------------------------------------------|----------------------------------------------------------------|
| Volume/Å <sup>3</sup>                       | 3278.39(14)                                                    |
| Z                                           | 2                                                              |
| ρ <sub>calc</sub> /cm <sup>3</sup>          | 1.314                                                          |
| μ/mm <sup>-1</sup>                          | 1.624                                                          |
| F(000)                                      | 1356.0                                                         |
| Crystal size/mm <sup>3</sup>                | 0.2 × 0.1 × 0.1                                                |
| Radiation                                   | Mo Kα (λ = 0.71073)                                            |
| 2θ range for data collection/°              | 5.17 to 52.044                                                 |
| Index ranges                                | -13 ≤ h ≤ 13, -20 ≤ k ≤ 20, -23 ≤ l ≤ 23                       |
| Reflections collected                       | 66539                                                          |
| Independent reflections                     | 12846 [R <sub>int</sub> = 0.0314, R <sub>sigma</sub> = 0.0222] |
| Data/restraints/parameters                  | 12846/81/786                                                   |
| Goodness-of-fit on F <sup>2</sup>           | 1.051                                                          |
| Final R indexes [I ≥ 2σ (I)]                | R <sub>1</sub> = 0.0265, wR <sub>2</sub> = 0.0670              |
| Final R indexes [all data]                  | R <sub>1</sub> = 0.0293, wR <sub>2</sub> = 0.0684              |
| Largest diff. peak/hole / e Å <sup>-3</sup> | 1.04/-0.46                                                     |

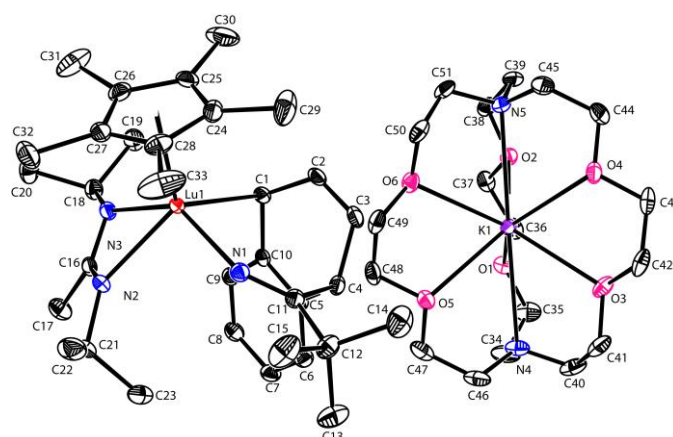

**Figure S25.** ORTEP drawing of **3a-Lu** with 30% thermal ellipsoids. H atoms are omitted for clarity.

**Table S4. Crystal data and structure refinement for 3a-Lu.**

|                     |                                                                  |
|---------------------|------------------------------------------------------------------|
| Identification code | <b>3a-Lu</b>                                                     |
| Empirical formula   | C <sub>51</sub> H <sub>85</sub> KLuN <sub>5</sub> O <sub>6</sub> |
| Formula weight      | 1078.30                                                          |
| Temperature/K       | 180.01(10)                                                       |
| Crystal system      | monoclinic                                                       |
| Space group         | C2/c                                                             |
| a/Å                 | 22.4894(4)                                                       |
| b/Å                 | 16.0831(3)                                                       |
| c/Å                 | 31.2872(5)                                                       |
| α/°                 | 90                                                               |



|                                               |                                                                |
|-----------------------------------------------|----------------------------------------------------------------|
| $\beta/^\circ$                                | 97.900(2)                                                      |
| $\gamma/^\circ$                               | 90                                                             |
| Volume/ $\text{\AA}^3$                        | 11209.2(3)                                                     |
| Z                                             | 8                                                              |
| $\rho_{\text{calc}}/\text{cm}^{-3}$           | 1.278                                                          |
| $\mu/\text{mm}^{-1}$                          | 1.883                                                          |
| F(000)                                        | 4512.0                                                         |
| Crystal size/ $\text{mm}^3$                   | $0.2 \times 0.2 \times 0.1$                                    |
| Radiation                                     | Mo K $\alpha$ ( $\lambda = 0.71073$ )                          |
| $2\Theta$ range for data collection/ $^\circ$ | 4.2 to 54.968                                                  |
| Index ranges                                  | $-29 \leq h \leq 29, -20 \leq k \leq 19, -40 \leq l \leq 40$   |
| Reflections collected                         | 91968                                                          |
| Independent reflections                       | 12830 [ $R_{\text{int}} = 0.0310, R_{\text{sigma}} = 0.0203$ ] |
| Data/restraints/parameters                    | 12830/0/590                                                    |
| Goodness-of-fit on $F^2$                      | 1.048                                                          |
| Final R indexes [ $I \geq 2\sigma(I)$ ]       | $R_1 = 0.0214, wR_2 = 0.0512$                                  |
| Final R indexes [all data]                    | $R_1 = 0.0243, wR_2 = 0.0520$                                  |
| Largest diff. peak/hole / $e \text{\AA}^{-3}$ | 0.81/-1.12                                                     |

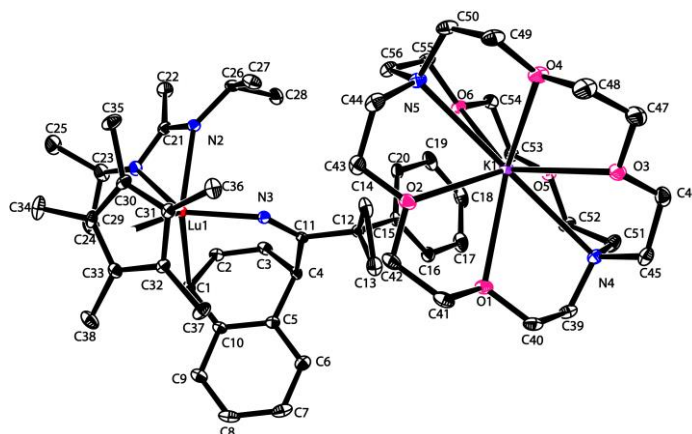

**Figure S26.** ORTEP drawing of **3b-Lu** with 30% thermal ellipsoids. H atoms are omitted for clarity.

**Table S5. Crystal data and structure refinement for 3b-Lu.**

|                     |                                                     |
|---------------------|-----------------------------------------------------|
| Identification code | <b>3b-Lu</b>                                        |
| Empirical formula   | $\text{C}_{56}\text{H}_{85}\text{KLuN}_5\text{O}_6$ |
| Formula weight      | 1138.35                                             |
| Temperature/K       | 120.02(12)                                          |
| Crystal system      | monoclinic                                          |
| Space group         | $P2_1/c$                                            |
| a/ $\text{\AA}$     | 12.0174(2)                                          |
| b/ $\text{\AA}$     | 30.4304(5)                                          |
|                     | S25                                                 |

|                                               |                                                                |
|-----------------------------------------------|----------------------------------------------------------------|
| $c/\text{\AA}$                                | 15.4433(3)                                                     |
| $\alpha/^\circ$                               | 90                                                             |
| $\beta/^\circ$                                | 90.3280(10)                                                    |
| $\gamma/^\circ$                               | 90                                                             |
| Volume/ $\text{\AA}^3$                        | 5647.43(17)                                                    |
| Z                                             | 4                                                              |
| $\rho_{\text{calc}}/\text{cm}^3$              | 1.339                                                          |
| $\mu/\text{mm}^{-1}$                          | 1.873                                                          |
| F(000)                                        | 2376.0                                                         |
| Crystal size/ $\text{mm}^3$                   | $0.2 \times 0.1 \times 0.1$                                    |
| Radiation                                     | Mo K $\alpha$ ( $\lambda = 0.71073$ )                          |
| $2\Theta$ range for data collection/ $^\circ$ | 4.32 to 54.968                                                 |
| Index ranges                                  | $-15 \leq h \leq 15, -39 \leq k \leq 39, -20 \leq l \leq 19$   |
| Reflections collected                         | 101197                                                         |
| Independent reflections                       | 12944 [ $R_{\text{int}} = 0.0311, R_{\text{sigma}} = 0.0191$ ] |
| Data/restraints/parameters                    | 12944/0/632                                                    |
| Goodness-of-fit on $F^2$                      | 1.025                                                          |
| Final R indexes [ $I \geq 2\sigma(I)$ ]       | $R_1 = 0.0186, wR_2 = 0.0404$                                  |
| Final R indexes [all data]                    | $R_1 = 0.0216, wR_2 = 0.0411$                                  |
| Largest diff. peak/hole / $e \text{\AA}^{-3}$ | 0.43/-0.54                                                     |

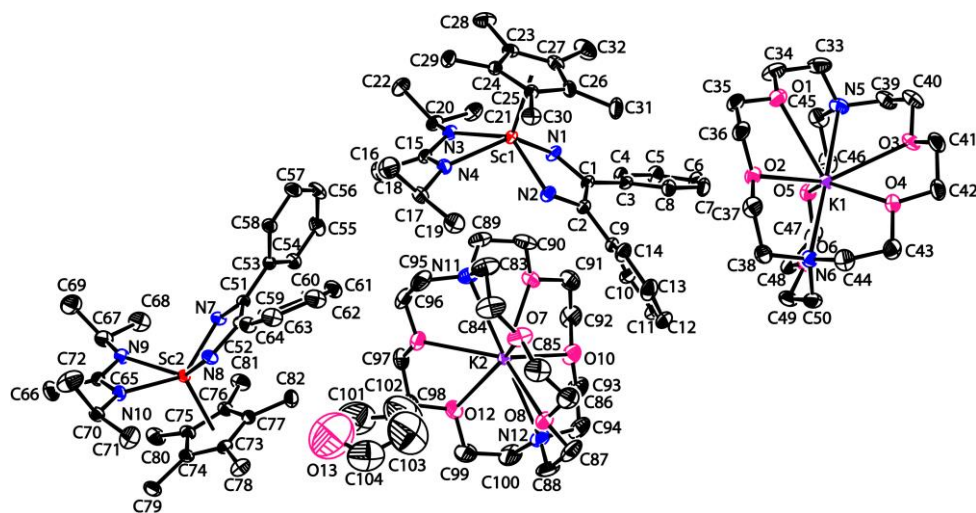

**Figure S27.** ORTEP drawing of **4-Sc·0.5THF** with 30% thermal ellipsoids. H atoms are omitted for clarity.

**Table S6. Crystal data and structure refinement for 4-Sc·0.5THF**

|                     |                                                                               |
|---------------------|-------------------------------------------------------------------------------|
| Identification code | <b>4-Sc·0.5THF</b>                                                            |
| Empirical formula   | $\text{C}_{104}\text{H}_{168}\text{K}_2\text{N}_{12}\text{O}_{13}\text{Sc}_2$ |
| Formula weight      | 1962.61                                                                       |
| Temperature/K       | 179.99(10)                                                                    |
| Crystal system      | triclinic                                                                     |

|                                             |                                                                |
|---------------------------------------------|----------------------------------------------------------------|
| Space group                                 | P-1                                                            |
| a/Å                                         | 10.0236(2)                                                     |
| b/Å                                         | 20.0100(3)                                                     |
| c/Å                                         | 28.1102(5)                                                     |
| $\alpha$ /°                                 | 89.1040(10)                                                    |
| $\beta$ /°                                  | 81.5760(10)                                                    |
| $\gamma$ /°                                 | 86.1240(10)                                                    |
| Volume/Å <sup>3</sup>                       | 5564.45(17)                                                    |
| Z                                           | 2                                                              |
| $\rho_{\text{calc}}$ /cm <sup>3</sup>       | 1.171                                                          |
| $\mu$ /mm <sup>-1</sup>                     | 0.258                                                          |
| F(000)                                      | 2120.0                                                         |
| Crystal size/mm <sup>3</sup>                | 0.2 × 0.1 × 0.1                                                |
| Radiation                                   | Mo K $\alpha$ ( $\lambda$ = 0.71073)                           |
| 2 $\Theta$ range for data collection/°      | 4.164 to 54.968                                                |
| Index ranges                                | -13 ≤ h ≤ 12, -25 ≤ k ≤ 25, -35 ≤ l ≤ 36                       |
| Reflections collected                       | 92797                                                          |
| Independent reflections                     | 25412 [R <sub>int</sub> = 0.0456, R <sub>sigma</sub> = 0.0454] |
| Data/restraints/parameters                  | 25412/2710/1258                                                |
| Goodness-of-fit on F <sup>2</sup>           | 1.049                                                          |
| Final R indexes [I ≥ 2 $\sigma$ (I)]        | R <sub>1</sub> = 0.0420, wR <sub>2</sub> = 0.1104              |
| Final R indexes [all data]                  | R <sub>1</sub> = 0.0617, wR <sub>2</sub> = 0.1173              |
| Largest diff. peak/hole / e Å <sup>-3</sup> | 0.32/-0.29                                                     |

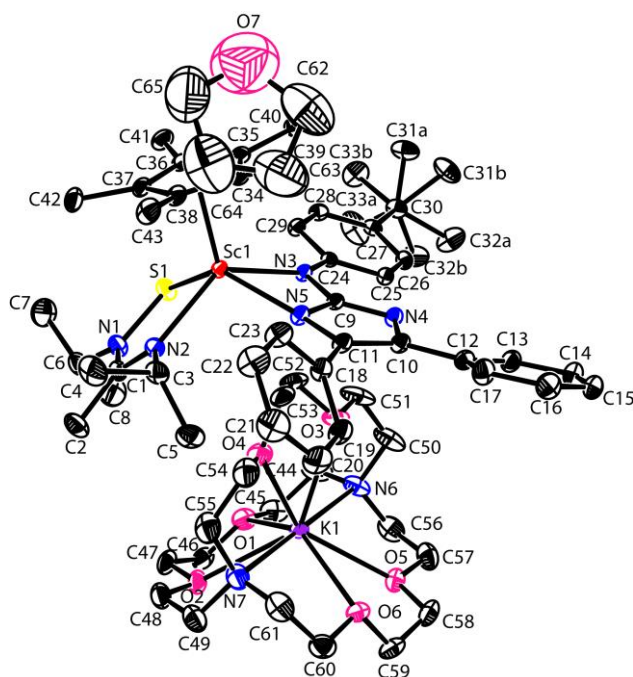

**Figure S28.** ORTEP drawing of **5-Sc·THF** with 30% thermal ellipsoids. H atoms are omitted

for clarity.

**Table S7. Crystal data and structure refinement for 5-Sc·THF.**

|                                             |                                                                    |
|---------------------------------------------|--------------------------------------------------------------------|
| Identification code                         | <b>5-Sc·THF</b>                                                    |
| Empirical formula                           | C <sub>65</sub> H <sub>99</sub> KN <sub>7</sub> O <sub>7</sub> SSc |
| Formula weight                              | 1206.63                                                            |
| Temperature/K                               | 180.00(10)                                                         |
| Crystal system                              | triclinic                                                          |
| Space group                                 | P-1                                                                |
| a/Å                                         | 12.7515(3)                                                         |
| b/Å                                         | 16.1744(5)                                                         |
| c/Å                                         | 17.9918(4)                                                         |
| α/°                                         | 85.841(2)                                                          |
| β/°                                         | 86.772(2)                                                          |
| γ/°                                         | 74.600(2)                                                          |
| Volume/Å <sup>3</sup>                       | 3565.47(16)                                                        |
| Z                                           | 2                                                                  |
| ρ <sub>calc</sub> /cm <sup>3</sup>          | 1.124                                                              |
| μ/mm <sup>-1</sup>                          | 0.242                                                              |
| F(000)                                      | 1300.0                                                             |
| Crystal size/mm <sup>3</sup>                | 0.2 × 0.1 × 0.1                                                    |
| Radiation                                   | Mo Kα (λ = 0.71073)                                                |
| 2θ range for data collection/°              | 4.142 to 54.964                                                    |
| Index ranges                                | -16 ≤ h ≤ 16, -20 ≤ k ≤ 20, -23 ≤ l ≤ 21                           |
| Reflections collected                       | 66866                                                              |
| Independent reflections                     | 16330 [R <sub>int</sub> = 0.0302, R <sub>sigma</sub> = 0.0289]     |
| Data/restraints/parameters                  | 16330/96/783                                                       |
| Goodness-of-fit on F <sup>2</sup>           | 1.045                                                              |
| Final R indexes [I ≥ 2σ (I)]                | R <sub>1</sub> = 0.0445, wR <sub>2</sub> = 0.1229                  |
| Final R indexes [all data]                  | R <sub>1</sub> = 0.0551, wR <sub>2</sub> = 0.1286                  |
| Largest diff. peak/hole / e Å <sup>-3</sup> | 0.41/-0.43                                                         |

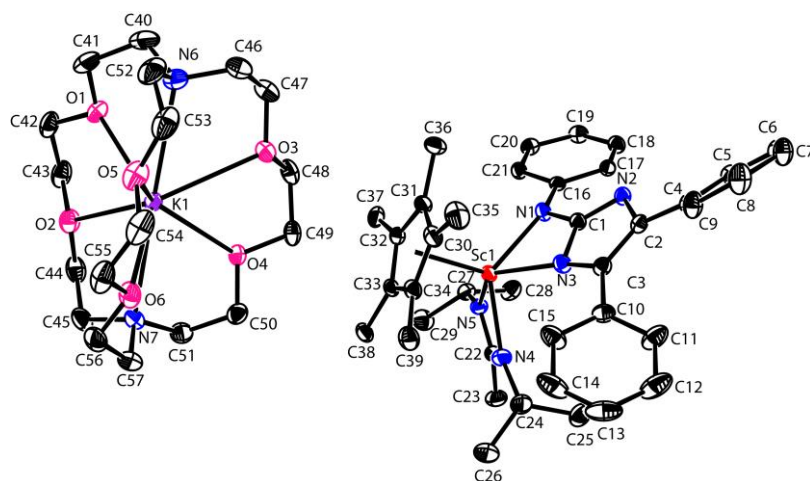

**Figure S29.** ORTEP drawing of **6-Sc** with 30% thermal ellipsoids. H atoms are omitted for clarity.

**Table S8. Crystal data and structure refinement for 6-Sc.**

|                                               |                                                                |
|-----------------------------------------------|----------------------------------------------------------------|
| Identification code                           | <b>6-Sc</b>                                                    |
| Empirical formula                             | $C_{57}H_{81}KN_7O_6Sc$                                        |
| Formula weight                                | 1044.34                                                        |
| Temperature/K                                 | 179.99(10)                                                     |
| Crystal system                                | monoclinic                                                     |
| Space group                                   | $P2_1/c$                                                       |
| $a/\text{\AA}$                                | 17.0310(4)                                                     |
| $b/\text{\AA}$                                | 16.3699(5)                                                     |
| $c/\text{\AA}$                                | 20.8212(6)                                                     |
| $\alpha/^\circ$                               | 90                                                             |
| $\beta/^\circ$                                | 91.375(2)                                                      |
| $\gamma/^\circ$                               | 90                                                             |
| Volume/ $\text{\AA}^3$                        | 5803.2(3)                                                      |
| Z                                             | 4                                                              |
| $\rho_{\text{calc}}/\text{cm}^3$              | 1.195                                                          |
| $\mu/\text{mm}^{-1}$                          | 0.251                                                          |
| F(000)                                        | 2240.0                                                         |
| Crystal size/ $\text{mm}^3$                   | $0.2 \times 0.1 \times 0.1$                                    |
| Radiation                                     | Mo $K\alpha$ ( $\lambda = 0.71073$ )                           |
| $2\theta$ range for data collection/ $^\circ$ | 3.996 to 54.97                                                 |
| Index ranges                                  | $-22 \leq h \leq 22, -17 \leq k \leq 21, -27 \leq l \leq 24$   |
| Reflections collected                         | 66471                                                          |
| Independent reflections                       | 13246 [ $R_{\text{int}} = 0.0273, R_{\text{sigma}} = 0.0225$ ] |
| Data/restraints/parameters                    | 13246/0/670                                                    |
| Goodness-of-fit on $F^2$                      | 1.034                                                          |

|                                                |                                  |
|------------------------------------------------|----------------------------------|
| Final R indexes [ $I \geq 2\sigma(I)$ ]        | $R_1 = 0.0406$ , $wR_2 = 0.1095$ |
| Final R indexes [all data]                     | $R_1 = 0.0511$ , $wR_2 = 0.1162$ |
| Largest diff. peak/hole / $e \text{ \AA}^{-3}$ | 0.66/-0.29                       |

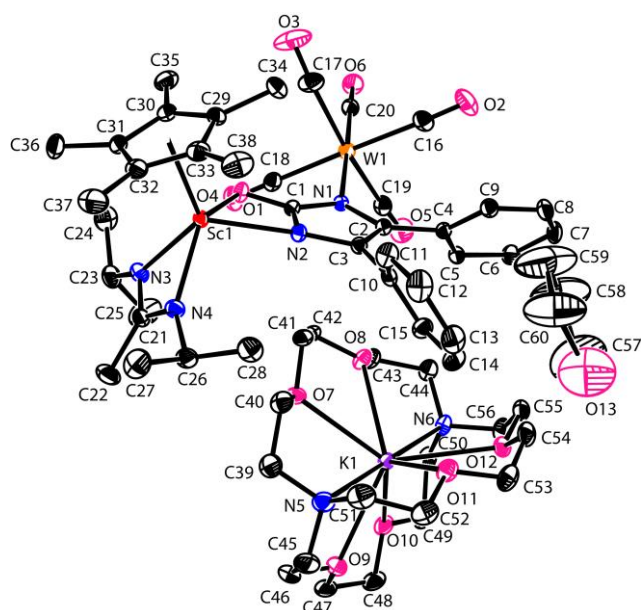

**Figure S30.** ORTEP drawing of **8-Sc·THF** with 30% thermal ellipsoids. H atoms are omitted for clarity.

**Table S9. Crystal data and structure refinement for 8-Sc·THF.**

|                                               |                                      |
|-----------------------------------------------|--------------------------------------|
| Identification code                           | <b>8-Sc·THF</b>                      |
| Empirical formula                             | $C_{60}H_{86}KN_6O_{13}ScW$          |
| Formula weight                                | 1367.25                              |
| Temperature/K                                 | 180.00(10)                           |
| Crystal system                                | triclinic                            |
| Space group                                   | P-1                                  |
| $a/\text{\AA}$                                | 10.1928(2)                           |
| $b/\text{\AA}$                                | 13.2264(3)                           |
| $c/\text{\AA}$                                | 24.7839(6)                           |
| $\alpha/^\circ$                               | 99.878(2)                            |
| $\beta/^\circ$                                | 97.836(2)                            |
| $\gamma/^\circ$                               | 95.700(2)                            |
| Volume/ $\text{\AA}^3$                        | 3235.07(13)                          |
| Z                                             | 2                                    |
| $\rho_{\text{calc}}/\text{g/cm}^3$            | 1.404                                |
| $\mu/\text{mm}^{-1}$                          | 2.009                                |
| F(000)                                        | 1412.0                               |
| Crystal size/ $\text{mm}^3$                   | $0.2 \times 0.1 \times 0.1$          |
| Radiation                                     | Mo $K\alpha$ ( $\lambda = 0.71073$ ) |
| $2\Theta$ range for data collection/ $^\circ$ | 4.82 to 54.968                       |

|                                                |                                                                |
|------------------------------------------------|----------------------------------------------------------------|
| Index ranges                                   | $-13 \leq h \leq 13, -17 \leq k \leq 17, -29 \leq l \leq 32$   |
| Reflections collected                          | 62494                                                          |
| Independent reflections                        | 14679 [ $R_{\text{int}} = 0.0313, R_{\text{sigma}} = 0.0288$ ] |
| Data/restraints/parameters                     | 14679/70/749                                                   |
| Goodness-of-fit on $F^2$                       | 1.027                                                          |
| Final R indexes [ $I \geq 2\sigma(I)$ ]        | $R_1 = 0.0264, wR_2 = 0.0625$                                  |
| Final R indexes [all data]                     | $R_1 = 0.0313, wR_2 = 0.0640$                                  |
| Largest diff. peak/hole / $e \text{ \AA}^{-3}$ | 0.88/-0.69                                                     |

## 5) Details of DFT Calculations

All calculations were carried out with GAUSSIAN 16 program package.<sup>7</sup> The structures were optimized at BP86-D3 level<sup>8,9</sup> using the Def2SVP basis set<sup>10</sup> in gas phase. The effect of solvent was examined by performing single-point self-consistent reaction field (SCRf) calculations based on the solvation model density (SMD)<sup>11</sup> for gas-phase optimized structures. THF was used as solvent, and solvation free energies ( $\Delta G_{\text{sol}}$ ) were calculated at BP86-D3/LANL2TZ+ (for Sc)/6-311+G(d,p) (for other elements) level,<sup>12,13</sup> by adding the solvation energies to the computed gas phase relative free energies ( $\Delta G_{\text{gas}}$ ). Harmonic frequency calculations were performed at the same level for every structure to confirm it as a local minimum and to derive the thermochemical corrections for enthalpies and free energies. The intrinsic reaction coordinate (IRC) analysis was carried out throughout the pathways to confirm that all stationary points are smoothly connected to each other. All enthalpies and the Gibbs free energies in the text were given in Hartree. All distances were given in  $\text{\AA}$ .

### 1-Sc

298 K, 1 atm, gas phase

Thermal correction to Enthalpy = 0.628867

Thermal correction to Gibbs Free Energy = 0.529042

Sum of electronic and thermal Enthalpies = -1960.051761

Sum of electronic and thermal Free Energies = -1960.151586

298 K, in THF

Sum of electronic and thermal Free Energies = -1247.180466

Standard orientation:

| Center Number | Atomic Number | Atomic Type | Coordinates (Angstroms) |           |           |
|---------------|---------------|-------------|-------------------------|-----------|-----------|
|               |               |             | X                       | Y         | Z         |
| 1             | 21            | 0           | -0.072055               | -0.013752 | -0.080209 |
| 2             | 7             | 0           | -1.939499               | 1.208650  | -0.662372 |
| 3             | 7             | 0           | -2.026511               | -1.045567 | -0.767501 |

|    |   |   |           |           |           |
|----|---|---|-----------|-----------|-----------|
| 4  | 6 | 0 | 1.438566  | -1.325516 | -1.420810 |
| 5  | 1 | 0 | 1.427146  | -2.429474 | -1.407435 |
| 6  | 6 | 0 | 2.751671  | -0.681311 | -1.224223 |
| 7  | 6 | 0 | 0.524696  | -0.642824 | -2.337582 |
| 8  | 1 | 0 | -0.176749 | -1.195463 | -2.984263 |
| 9  | 6 | 0 | 0.513470  | 0.747152  | -2.301109 |
| 10 | 1 | 0 | -0.196399 | 1.321674  | -2.918551 |
| 11 | 6 | 0 | 1.043880  | -1.050091 | 1.959945  |
| 12 | 6 | 0 | 2.748898  | 0.759043  | -1.218216 |
| 13 | 6 | 0 | -0.366033 | -1.205544 | 2.150197  |
| 14 | 6 | 0 | 3.968684  | -1.361301 | -1.005553 |
| 15 | 1 | 0 | 3.970609  | -2.465566 | -1.012361 |
| 16 | 6 | 0 | 1.336598  | 0.352726  | 1.996378  |
| 17 | 6 | 0 | -2.618641 | 0.123567  | -1.058490 |
| 18 | 6 | 0 | 1.424627  | 1.395115  | -1.354916 |
| 19 | 1 | 0 | 1.405334  | 2.497415  | -1.303599 |
| 20 | 6 | 0 | -0.950595 | 0.093531  | 2.293445  |
| 21 | 6 | 0 | 5.169227  | 0.748121  | -0.764308 |
| 22 | 1 | 0 | 6.097794  | 1.309185  | -0.561266 |
| 23 | 6 | 0 | 3.966213  | 1.445626  | -1.035797 |
| 24 | 1 | 0 | 3.960048  | 2.550080  | -1.044942 |
| 25 | 6 | 0 | 5.168873  | -0.653788 | -0.741315 |
| 26 | 1 | 0 | 6.097269  | -1.209102 | -0.522436 |
| 27 | 6 | 0 | 0.104380  | 1.059032  | 2.197202  |
| 28 | 6 | 0 | -2.452641 | 2.550249  | -0.877791 |
| 29 | 1 | 0 | -3.049265 | 2.602274  | -1.825137 |
| 30 | 6 | 0 | -2.564704 | -2.315960 | -1.229118 |
| 31 | 1 | 0 | -2.920581 | -2.233321 | -2.290884 |
| 32 | 6 | 0 | 2.046748  | -2.165378 | 1.858778  |
| 33 | 1 | 0 | 1.625307  | -3.041304 | 1.322312  |
| 34 | 1 | 0 | 2.381291  | -2.516795 | 2.863309  |
| 35 | 1 | 0 | 2.945234  | -1.847695 | 1.293282  |
| 36 | 6 | 0 | -1.103036 | -2.498576 | 2.347259  |
| 37 | 1 | 0 | -2.111833 | -2.461071 | 1.890849  |
| 38 | 1 | 0 | -1.239748 | -2.728934 | 3.430703  |
| 39 | 1 | 0 | -0.563466 | -3.359023 | 1.901152  |
| 40 | 6 | 0 | -2.415359 | 0.334649  | 2.537084  |
| 41 | 1 | 0 | -2.639173 | 1.410226  | 2.673610  |
| 42 | 1 | 0 | -2.769199 | -0.198540 | 3.449177  |
| 43 | 1 | 0 | -3.031422 | -0.026341 | 1.683644  |
| 44 | 6 | 0 | 2.705712  | 0.971232  | 1.996630  |
| 45 | 1 | 0 | 3.453217  | 0.327114  | 1.494111  |
| 46 | 1 | 0 | 3.059811  | 1.158658  | 3.038214  |
| 47 | 1 | 0 | 2.721641  | 1.939756  | 1.458021  |
| 48 | 6 | 0 | -3.776158 | -2.784351 | -0.387537 |
| 49 | 1 | 0 | -3.461902 | -2.984651 | 0.657416  |
| 50 | 1 | 0 | -4.220244 | -3.717635 | -0.799914 |
| 51 | 1 | 0 | -4.570399 | -2.010707 | -0.351214 |
| 52 | 6 | 0 | -1.297846 | 3.552037  | -1.033146 |
| 53 | 1 | 0 | -0.615596 | 3.482972  | -0.163262 |



|    |   |   |           |           |           |
|----|---|---|-----------|-----------|-----------|
| 54 | 1 | 0 | -1.679391 | 4.593197  | -1.107217 |
| 55 | 1 | 0 | -0.698954 | 3.330941  | -1.937483 |
| 56 | 6 | 0 | -0.004648 | 2.547454  | 2.382258  |
| 57 | 1 | 0 | 0.681496  | 3.090718  | 1.698895  |
| 58 | 1 | 0 | 0.259405  | 2.857922  | 3.420858  |
| 59 | 1 | 0 | -1.030486 | 2.915407  | 2.179920  |
| 60 | 6 | 0 | -3.399071 | 2.993068  | 0.261765  |
| 61 | 1 | 0 | -4.209925 | 2.253073  | 0.422496  |
| 62 | 1 | 0 | -3.862778 | 3.981008  | 0.045127  |
| 63 | 1 | 0 | -2.835652 | 3.076199  | 1.213482  |
| 64 | 6 | 0 | -3.927603 | 0.236944  | -1.837539 |
| 65 | 1 | 0 | -3.817689 | 0.959982  | -2.672607 |
| 66 | 1 | 0 | -4.745925 | 0.614847  | -1.189335 |
| 67 | 1 | 0 | -4.249871 | -0.729002 | -2.266931 |
| 68 | 6 | 0 | -1.464962 | -3.389979 | -1.224866 |
| 69 | 1 | 0 | -0.661618 | -3.138372 | -1.942317 |
| 70 | 1 | 0 | -1.878471 | -4.386196 | -1.491870 |
| 71 | 1 | 0 | -0.999315 | -3.455821 | -0.221803 |

PhCN

298 K, 1 atm, gas phase

Thermal correction to Enthalpy = 0.103599

Thermal correction to Gibbs Free Energy = 0.065982

Sum of electronic and thermal Enthalpies = -324.155885

Sum of electronic and thermal Free Energies = -324.193502

298 K, in THF

Sum of electronic and thermal Free Energies = -324.522432

Standard orientation:

| Center<br>Number | Atomic<br>Number | Atomic<br>Type | Coordinates (Angstroms) |           |           |
|------------------|------------------|----------------|-------------------------|-----------|-----------|
|                  |                  |                | X                       | Y         | Z         |
| 1                | 6                | 0              | -2.055752               | -0.000004 | -0.000013 |
| 2                | 7                | 0              | -3.230621               | 0.000003  | -0.000046 |
| 3                | 6                | 0              | -0.617919               | -0.000000 | -0.000003 |
| 4                | 6                | 0              | 0.091644                | -1.226677 | 0.000003  |
| 5                | 6                | 0              | 0.091644                | 1.226677  | 0.000003  |
| 6                | 6                | 0              | 1.493886                | -1.219203 | 0.000016  |
| 7                | 1                | 0              | -0.465913               | -2.175221 | -0.000001 |
| 8                | 6                | 0              | 1.493885                | 1.219204  | 0.000016  |
| 9                | 1                | 0              | -0.465913               | 2.175222  | -0.000001 |
| 10               | 6                | 0              | 2.196217                | 0.000000  | 0.000022  |
| 11               | 1                | 0              | 2.043481                | -2.173342 | 0.000021  |
| 12               | 1                | 0              | 2.043481                | 2.173343  | 0.000021  |
| 13               | 1                | 0              | 3.297573                | 0.000000  | 0.000031  |

ad1

298 K, 1 atm, gas phase

Thermal correction to Enthalpy = 0.734505

Thermal correction to Gibbs Free Energy = 0.616887

Sum of electronic and thermal Enthalpies = -2284.240225

Sum of electronic and thermal Free Energies = -2284.357843

298 K, in THF

Sum of electronic and thermal Free Energies = -1571.698772

Standard orientation:

| Center<br>Number | Atomic<br>Number | Atomic<br>Type | Coordinates (Angstroms) |           |           |
|------------------|------------------|----------------|-------------------------|-----------|-----------|
|                  |                  |                | X                       | Y         | Z         |
| 1                | 6                | 0              | -6.269749               | -1.688557 | 0.191671  |
| 2                | 6                | 0              | -5.691815               | -0.524390 | 0.747513  |
| 3                | 6                | 0              | -4.307581               | -0.340206 | 0.781953  |
| 4                | 6                | 0              | -3.432234               | -1.341026 | 0.223048  |
| 5                | 6                | 0              | -4.027837               | -2.532191 | -0.328286 |
| 6                | 6                | 0              | -5.412279               | -2.688050 | -0.337411 |
| 7                | 6                | 0              | -2.045494               | -1.140714 | 0.194379  |
| 8                | 7                | 0              | -0.857920               | -1.054640 | 0.340168  |
| 9                | 6                | 0              | -2.318231               | 0.135772  | -2.133166 |
| 10               | 6                | 0              | -1.085995               | -0.391264 | -2.558789 |
| 11               | 6                | 0              | 0.121522                | 0.261856  | -2.265698 |
| 12               | 6                | 0              | 0.139302                | 1.526488  | -1.565141 |
| 13               | 6                | 0              | -1.139510               | 2.182415  | -1.315071 |
| 14               | 6                | 0              | -2.374586               | 1.457014  | -1.549560 |
| 15               | 6                | 0              | -3.611488               | 2.079662  | -1.226432 |
| 16               | 6                | 0              | -3.663842               | 3.394166  | -0.725686 |
| 17               | 6                | 0              | -2.472389               | 4.129326  | -0.583795 |
| 18               | 6                | 0              | -1.236234               | 3.534088  | -0.894182 |
| 19               | 21               | 0              | 0.997475                | -0.015938 | 0.177712  |
| 20               | 6                | 0              | 2.469761                | 1.074171  | 1.911457  |
| 21               | 6                | 0              | 1.395135                | 1.989615  | 1.672993  |
| 22               | 6                | 0              | 0.183657                | 1.363227  | 2.128455  |
| 23               | 6                | 0              | 0.522486                | 0.074260  | 2.660481  |
| 24               | 6                | 0              | 1.933437                | -0.110360 | 2.512395  |
| 25               | 6                | 0              | 1.568079                | 3.408809  | 1.203301  |
| 26               | 6                | 0              | 3.935481                | 1.355632  | 1.757672  |
| 27               | 6                | 0              | -1.208232               | 1.939114  | 2.102861  |
| 28               | 6                | 0              | 2.761755                | -1.278202 | 2.975738  |
| 29               | 6                | 0              | -0.434798               | -0.859513 | 3.348825  |
| 30               | 7                | 0              | 1.932133                | -2.009549 | -0.254386 |
| 31               | 6                | 0              | 1.501329                | -3.400707 | -0.290117 |
| 32               | 6                | 0              | 0.915667                | -3.803293 | 1.072808  |
| 33               | 7                | 0              | 3.045204                | -0.203385 | -1.021582 |
| 34               | 6                | 0              | 4.028249                | 0.463324  | -1.867481 |
| 35               | 6                | 0              | 3.659751                | 1.941787  | -2.055448 |
| 36               | 6                | 0              | 2.901721                | -1.537902 | -1.048849 |
| 37               | 6                | 0              | 3.733191                | -2.472155 | -1.926993 |

|    |   |   |           |           |           |
|----|---|---|-----------|-----------|-----------|
| 38 | 6 | 0 | 0.467722  | -3.637569 | -1.414259 |
| 39 | 6 | 0 | 5.476198  | 0.340219  | -1.333261 |
| 40 | 1 | 0 | 1.023823  | 2.177582  | -1.643515 |
| 41 | 1 | 0 | 1.069556  | -0.156715 | -2.641682 |
| 42 | 1 | 0 | -1.057967 | -1.366969 | -3.070979 |
| 43 | 1 | 0 | -0.308563 | 4.119752  | -0.800041 |
| 44 | 1 | 0 | -3.262459 | -0.373805 | -2.376081 |
| 45 | 1 | 0 | -4.635957 | 3.851567  | -0.476687 |
| 46 | 1 | 0 | -4.540217 | 1.512179  | -1.396329 |
| 47 | 1 | 0 | -2.502992 | 5.175347  | -0.234100 |
| 48 | 1 | 0 | 2.375734  | -4.073009 | -0.483445 |
| 49 | 1 | 0 | 4.027640  | 0.010720  | -2.894548 |
| 50 | 1 | 0 | 2.001319  | 3.474827  | 0.181457  |
| 51 | 1 | 0 | 2.246260  | 3.976691  | 1.880020  |
| 52 | 1 | 0 | 0.598937  | 3.941590  | 1.175339  |
| 53 | 1 | 0 | 4.482497  | 0.454187  | 1.416972  |
| 54 | 1 | 0 | 4.389024  | 1.678824  | 2.724782  |
| 55 | 1 | 0 | 4.127633  | 2.160931  | 1.020772  |
| 56 | 1 | 0 | 2.130251  | -2.064263 | 3.435037  |
| 57 | 1 | 0 | 3.515913  | -0.969629 | 3.735407  |
| 58 | 1 | 0 | 3.307755  | -1.747302 | 2.128470  |
| 59 | 1 | 0 | -1.203685 | 3.022537  | 1.878109  |
| 60 | 1 | 0 | -1.725166 | 1.787940  | 3.074886  |
| 61 | 1 | 0 | -1.839072 | 1.475036  | 1.314311  |
| 62 | 1 | 0 | 5.596200  | 0.912162  | -0.392292 |
| 63 | 1 | 0 | 6.207695  | 0.734651  | -2.072887 |
| 64 | 1 | 0 | 5.741502  | -0.715182 | -1.117978 |
| 65 | 1 | 0 | -0.420323 | -2.999415 | -1.237317 |
| 66 | 1 | 0 | 0.149281  | -4.702240 | -1.458055 |
| 67 | 1 | 0 | 0.879495  | -3.357197 | -2.406522 |
| 68 | 1 | 0 | -1.459843 | -0.767976 | 2.939186  |
| 69 | 1 | 0 | -0.486413 | -0.648015 | 4.442361  |
| 70 | 1 | 0 | -0.134276 | -1.919458 | 3.226635  |
| 71 | 1 | 0 | 1.678850  | -3.710567 | 1.870474  |
| 72 | 1 | 0 | 0.546475  | -4.850969 | 1.055857  |
| 73 | 1 | 0 | 0.071620  | -3.129393 | 1.323210  |
| 74 | 1 | 0 | 3.075113  | -3.117552 | -2.542789 |
| 75 | 1 | 0 | 4.349756  | -3.144390 | -1.293883 |
| 76 | 1 | 0 | 4.410569  | -1.928843 | -2.610090 |
| 77 | 1 | 0 | 2.705354  | 2.047030  | -2.607156 |
| 78 | 1 | 0 | 4.449487  | 2.482061  | -2.619308 |
| 79 | 1 | 0 | 3.534313  | 2.432778  | -1.068449 |
| 80 | 1 | 0 | -3.871600 | 0.568673  | 1.218900  |
| 81 | 1 | 0 | -3.371308 | -3.307833 | -0.752821 |
| 82 | 1 | 0 | -6.340726 | 0.261390  | 1.170552  |
| 83 | 1 | 0 | -5.844248 | -3.608821 | -0.765927 |
| 84 | 1 | 0 | -7.363021 | -1.820276 | 0.173231  |

298 K, 1 atm, gas phase

Thermal correction to Enthalpy = 0.733616

Thermal correction to Gibbs Free Energy = 0.617635

Sum of electronic and thermal Enthalpies = -2284.240666

Sum of electronic and thermal Free Energies = -2284.356646

298 K, in THF

Sum of electronic and thermal Free Energies = -1571.697807

Standard orientation:

| Center<br>Number | Atomic<br>Number | Atomic<br>Type | Coordinates (Angstroms) |           |           |
|------------------|------------------|----------------|-------------------------|-----------|-----------|
|                  |                  |                | X                       | Y         | Z         |
| 1                | 6                | 0              | -6.250850               | -1.717283 | 0.289470  |
| 2                | 6                | 0              | -5.681206               | -0.539451 | 0.818445  |
| 3                | 6                | 0              | -4.300221               | -0.315562 | 0.771110  |
| 4                | 6                | 0              | -3.434170               | -1.283298 | 0.163058  |
| 5                | 6                | 0              | -4.019358               | -2.478511 | -0.368202 |
| 6                | 6                | 0              | -5.398566               | -2.684440 | -0.297167 |
| 7                | 6                | 0              | -2.050437               | -1.006969 | -0.006529 |
| 8                | 7                | 0              | -0.882788               | -0.992898 | 0.308486  |
| 9                | 6                | 0              | -2.252751               | 0.108118  | -2.090703 |
| 10               | 6                | 0              | -1.015852               | -0.363396 | -2.610359 |
| 11               | 6                | 0              | 0.176028                | 0.302562  | -2.327077 |
| 12               | 6                | 0              | 0.197636                | 1.532163  | -1.559398 |
| 13               | 6                | 0              | -1.088229               | 2.187800  | -1.323330 |
| 14               | 6                | 0              | -2.318609               | 1.461266  | -1.560669 |
| 15               | 6                | 0              | -3.558107               | 2.092303  | -1.277017 |
| 16               | 6                | 0              | -3.619195               | 3.412952  | -0.794492 |
| 17               | 6                | 0              | -2.428365               | 4.146009  | -0.636393 |
| 18               | 6                | 0              | -1.189750               | 3.543591  | -0.918558 |
| 19               | 21               | 0              | 0.993616                | -0.011795 | 0.184150  |
| 20               | 6                | 0              | 2.463818                | 1.061411  | 1.932338  |
| 21               | 6                | 0              | 1.406425                | 1.993685  | 1.683498  |
| 22               | 6                | 0              | 0.180804                | 1.387463  | 2.127376  |
| 23               | 6                | 0              | 0.493062                | 0.093781  | 2.663000  |
| 24               | 6                | 0              | 1.902093                | -0.114324 | 2.528685  |
| 25               | 6                | 0              | 1.604920                | 3.406935  | 1.205861  |
| 26               | 6                | 0              | 3.935517                | 1.317255  | 1.789726  |
| 27               | 6                | 0              | -1.202211               | 1.982943  | 2.093280  |
| 28               | 6                | 0              | 2.707461                | -1.296546 | 2.996621  |
| 29               | 6                | 0              | -0.494010               | -0.823223 | 3.331521  |
| 30               | 7                | 0              | 1.880037                | -2.028123 | -0.233936 |
| 31               | 6                | 0              | 1.412342                | -3.407446 | -0.268128 |
| 32               | 6                | 0              | 0.791373                | -3.779006 | 1.088096  |
| 33               | 7                | 0              | 3.043767                | -0.250957 | -0.993795 |
| 34               | 6                | 0              | 4.048613                | 0.391174  | -1.832278 |
| 35               | 6                | 0              | 3.722164                | 1.879978  | -2.017169 |
| 36               | 6                | 0              | 2.862488                | -1.580843 | -1.026364 |
| 37               | 6                | 0              | 3.670620                | -2.535093 | -1.904609 |

|    |   |   |           |           |           |
|----|---|---|-----------|-----------|-----------|
| 38 | 6 | 0 | 0.390351  | -3.628367 | -1.406212 |
| 39 | 6 | 0 | 5.488442  | 0.226103  | -1.287733 |
| 40 | 1 | 0 | 1.073308  | 2.195408  | -1.646111 |
| 41 | 1 | 0 | 1.125404  | -0.093674 | -2.724636 |
| 42 | 1 | 0 | -0.986280 | -1.318555 | -3.159570 |
| 43 | 1 | 0 | -0.262488 | 4.129027  | -0.817156 |
| 44 | 1 | 0 | -3.195753 | -0.371178 | -2.396675 |
| 45 | 1 | 0 | -4.595241 | 3.875201  | -0.571266 |
| 46 | 1 | 0 | -4.485385 | 1.523875  | -1.454475 |
| 47 | 1 | 0 | -2.461965 | 5.195834  | -0.298572 |
| 48 | 1 | 0 | 2.272473  | -4.103852 | -0.440848 |
| 49 | 1 | 0 | 4.042728  | -0.057827 | -2.861094 |
| 50 | 1 | 0 | 2.042126  | 3.458750  | 0.184884  |
| 51 | 1 | 0 | 2.290363  | 3.967892  | 1.881039  |
| 52 | 1 | 0 | 0.644801  | 3.955715  | 1.171505  |
| 53 | 1 | 0 | 4.468750  | 0.406458  | 1.451938  |
| 54 | 1 | 0 | 4.388340  | 1.631656  | 2.760134  |
| 55 | 1 | 0 | 4.147762  | 2.119320  | 1.054687  |
| 56 | 1 | 0 | 2.060399  | -2.068692 | 3.458036  |
| 57 | 1 | 0 | 3.466715  | -1.000070 | 3.755996  |
| 58 | 1 | 0 | 3.244739  | -1.779587 | 2.151583  |
| 59 | 1 | 0 | -1.183512 | 3.062725  | 1.852397  |
| 60 | 1 | 0 | -1.720433 | 1.852488  | 3.067889  |
| 61 | 1 | 0 | -1.838356 | 1.513093  | 1.312478  |
| 62 | 1 | 0 | 5.613494  | 0.785361  | -0.339655 |
| 63 | 1 | 0 | 6.236549  | 0.609291  | -2.016645 |
| 64 | 1 | 0 | 5.724868  | -0.837862 | -1.080915 |
| 65 | 1 | 0 | -0.484521 | -2.968101 | -1.246220 |
| 66 | 1 | 0 | 0.048081  | -4.685830 | -1.445699 |
| 67 | 1 | 0 | 0.821648  | -3.365969 | -2.394944 |
| 68 | 1 | 0 | -1.490677 | -0.765283 | 2.851631  |
| 69 | 1 | 0 | -0.616982 | -0.565274 | 4.409476  |
| 70 | 1 | 0 | -0.173070 | -1.882620 | 3.274763  |
| 71 | 1 | 0 | 1.542639  | -3.698808 | 1.898488  |
| 72 | 1 | 0 | 0.392991  | -4.816050 | 1.075509  |
| 73 | 1 | 0 | -0.037099 | -3.076870 | 1.313779  |
| 74 | 1 | 0 | 2.997292  | -3.167051 | -2.517557 |
| 75 | 1 | 0 | 4.272831  | -3.219378 | -1.270495 |
| 76 | 1 | 0 | 4.359007  | -2.008182 | -2.589718 |
| 77 | 1 | 0 | 2.773927  | 2.013898  | -2.573123 |
| 78 | 1 | 0 | 4.529809  | 2.399792  | -2.574944 |
| 79 | 1 | 0 | 3.604873  | 2.370893  | -1.029232 |
| 80 | 1 | 0 | -3.865155 | 0.601874  | 1.191941  |
| 81 | 1 | 0 | -3.362787 | -3.228815 | -0.836944 |
| 82 | 1 | 0 | -6.328518 | 0.220782  | 1.287772  |
| 83 | 1 | 0 | -5.825360 | -3.617374 | -0.703588 |
| 84 | 1 | 0 | -7.339018 | -1.883286 | 0.333557  |

298 K, 1 atm, gas phase

Thermal correction to Enthalpy = 0.736112

Thermal correction to Gibbs Free Energy = 0.620946

Sum of electronic and thermal Enthalpies = -2284.259940

Sum of electronic and thermal Free Energies = -2284.375106

298 K, in THF

Sum of electronic and thermal Free Energies = -1571.715199

Standard orientation:

| Center<br>Number | Atomic<br>Number | Atomic<br>Type | Coordinates (Angstroms) |           |           |
|------------------|------------------|----------------|-------------------------|-----------|-----------|
|                  |                  |                | X                       | Y         | Z         |
| 1                | 6                | 0              | -5.921105               | -2.278408 | 0.395018  |
| 2                | 6                | 0              | -5.940528               | -1.098252 | -0.367242 |
| 3                | 6                | 0              | -4.738307               | -0.448636 | -0.702630 |
| 4                | 6                | 0              | -3.488533               | -0.947738 | -0.265175 |
| 5                | 6                | 0              | -3.490278               | -2.135626 | 0.507499  |
| 6                | 6                | 0              | -4.683278               | -2.797231 | 0.825968  |
| 7                | 6                | 0              | -2.161169               | -0.283375 | -0.564671 |
| 8                | 7                | 0              | -1.121904               | -0.532823 | 0.121702  |
| 9                | 6                | 0              | -2.097050               | 0.718153  | -1.787806 |
| 10               | 6                | 0              | -0.905850               | 0.366150  | -2.654371 |
| 11               | 6                | 0              | 0.325310                | 0.888600  | -2.361990 |
| 12               | 6                | 0              | 0.524328                | 1.860327  | -1.290172 |
| 13               | 6                | 0              | -0.661385               | 2.651833  | -0.961026 |
| 14               | 6                | 0              | -1.970306               | 2.140863  | -1.249577 |
| 15               | 6                | 0              | -3.103800               | 2.931567  | -0.989021 |
| 16               | 6                | 0              | -2.998890               | 4.222591  | -0.438653 |
| 17               | 6                | 0              | -1.716576               | 4.745205  | -0.179120 |
| 18               | 6                | 0              | -0.576207               | 3.978820  | -0.453519 |
| 19               | 21               | 0              | 0.901203                | -0.038055 | 0.193483  |
| 20               | 6                | 0              | 2.516759                | 0.522527  | 2.065073  |
| 21               | 6                | 0              | 1.610040                | 1.625192  | 1.977870  |
| 22               | 6                | 0              | 0.305157                | 1.147539  | 2.342063  |
| 23               | 6                | 0              | 0.422548                | -0.240561 | 2.686337  |
| 24               | 6                | 0              | 1.784078                | -0.632963 | 2.495773  |
| 25               | 6                | 0              | 2.013901                | 3.047213  | 1.698879  |
| 26               | 6                | 0              | 4.009673                | 0.572417  | 1.918120  |
| 27               | 6                | 0              | -0.980815               | 1.926007  | 2.415722  |
| 28               | 6                | 0              | 2.408028                | -1.976375 | 2.761929  |
| 29               | 6                | 0              | -0.713462               | -1.075490 | 3.206450  |
| 30               | 7                | 0              | 1.399030                | -2.107771 | -0.503477 |
| 31               | 6                | 0              | 0.691172                | -3.368601 | -0.676202 |
| 32               | 6                | 0              | 0.051437                | -3.762453 | 0.664427  |
| 33               | 7                | 0              | 2.873989                | -0.494812 | -1.067412 |
| 34               | 6                | 0              | 3.991897                | 0.045071  | -1.828313 |
| 35               | 6                | 0              | 3.990239                | 1.580178  | -1.779575 |
| 36               | 6                | 0              | 2.429981                | -1.742114 | -1.278373 |
| 37               | 6                | 0              | 3.012100                | -2.694733 | -2.321970 |

|    |   |   |           |           |           |
|----|---|---|-----------|-----------|-----------|
| 38 | 6 | 0 | -0.385707 | -3.281099 | -1.780502 |
| 39 | 6 | 0 | 5.357238  | -0.498138 | -1.340867 |
| 40 | 1 | 0 | 1.470105  | 2.426970  | -1.299437 |
| 41 | 1 | 0 | 1.205364  | 0.553355  | -2.938186 |
| 42 | 1 | 0 | -1.036007 | -0.382672 | -3.451753 |
| 43 | 1 | 0 | 0.423334  | 4.412699  | -0.291699 |
| 44 | 1 | 0 | -3.032018 | 0.632320  | -2.381180 |
| 45 | 1 | 0 | -3.904336 | 4.814401  | -0.226588 |
| 46 | 1 | 0 | -4.103384 | 2.522632  | -1.217054 |
| 47 | 1 | 0 | -1.604748 | 5.765142  | 0.227301  |
| 48 | 1 | 0 | 1.408278  | -4.180973 | -0.960934 |
| 49 | 1 | 0 | 3.904505  | -0.232445 | -2.913267 |
| 50 | 1 | 0 | 2.538207  | 3.158720  | 0.724878  |
| 51 | 1 | 0 | 2.702598  | 3.433124  | 2.485178  |
| 52 | 1 | 0 | 1.131819  | 3.714172  | 1.670690  |
| 53 | 1 | 0 | 4.394127  | -0.346519 | 1.431920  |
| 54 | 1 | 0 | 4.515858  | 0.664510  | 2.908856  |
| 55 | 1 | 0 | 4.338190  | 1.434449  | 1.303160  |
| 56 | 1 | 0 | 1.665974  | -2.694988 | 3.163735  |
| 57 | 1 | 0 | 3.237111  | -1.903292 | 3.502288  |
| 58 | 1 | 0 | 2.824148  | -2.420072 | 1.831111  |
| 59 | 1 | 0 | -0.873494 | 2.949438  | 2.008182  |
| 60 | 1 | 0 | -1.351399 | 2.004786  | 3.463658  |
| 61 | 1 | 0 | -1.777093 | 1.433187  | 1.818164  |
| 62 | 1 | 0 | 5.567103  | -0.143852 | -0.311727 |
| 63 | 1 | 0 | 6.184977  | -0.156914 | -2.001642 |
| 64 | 1 | 0 | 5.368672  | -1.607333 | -1.321099 |
| 65 | 1 | 0 | -1.140929 | -2.522826 | -1.497877 |
| 66 | 1 | 0 | -0.892741 | -4.259482 | -1.930525 |
| 67 | 1 | 0 | 0.051090  | -2.960886 | -2.749259 |
| 68 | 1 | 0 | -1.581071 | -1.011431 | 2.518084  |
| 69 | 1 | 0 | -1.039834 | -0.730469 | 4.214479  |
| 70 | 1 | 0 | -0.434874 | -2.145381 | 3.290766  |
| 71 | 1 | 0 | 0.825731  | -3.971476 | 1.428332  |
| 72 | 1 | 0 | -0.599396 | -4.656649 | 0.560491  |
| 73 | 1 | 0 | -0.556997 | -2.904866 | 1.018160  |
| 74 | 1 | 0 | 2.208878  | -3.109130 | -2.963054 |
| 75 | 1 | 0 | 3.506907  | -3.553780 | -1.821373 |
| 76 | 1 | 0 | 3.755241  | -2.206201 | -2.978431 |
| 77 | 1 | 0 | 3.103934  | 1.997251  | -2.294991 |
| 78 | 1 | 0 | 4.901004  | 1.994777  | -2.261880 |
| 79 | 1 | 0 | 3.959087  | 1.927633  | -0.726645 |
| 80 | 1 | 0 | -4.779411 | 0.472847  | -1.301254 |
| 81 | 1 | 0 | -2.516496 | -2.520070 | 0.845024  |
| 82 | 1 | 0 | -6.901278 | -0.675722 | -0.706600 |
| 83 | 1 | 0 | -4.651186 | -3.726827 | 1.418911  |
| 84 | 1 | 0 | -6.862453 | -2.791904 | 0.652152  |

298 K, 1 atm, gas phase

Thermal correction to Enthalpy = 0.733233

Thermal correction to Gibbs Free Energy = 0.617443

Sum of electronic and thermal Enthalpies = -2284.218752

Sum of electronic and thermal Free Energies = -2284.334543

298 K, in THF

Sum of electronic and thermal Free Energies = -1571.675502

Standard orientation:

| Center<br>Number | Atomic<br>Number | Atomic<br>Type | Coordinates (Angstroms) |           |           |
|------------------|------------------|----------------|-------------------------|-----------|-----------|
|                  |                  |                | X                       | Y         | Z         |
| 1                | 6                | 0              | -5.663975               | -1.703210 | 0.287974  |
| 2                | 6                | 0              | -4.999015               | -0.656969 | 0.953626  |
| 3                | 6                | 0              | -3.614290               | -0.482256 | 0.818516  |
| 4                | 6                | 0              | -2.853647               | -1.379017 | 0.021862  |
| 5                | 6                | 0              | -3.534594               | -2.432908 | -0.659421 |
| 6                | 6                | 0              | -4.917088               | -2.587059 | -0.526592 |
| 7                | 6                | 0              | -1.432322               | -1.226454 | -0.177603 |
| 8                | 7                | 0              | -0.395981               | -1.863880 | -0.332440 |
| 9                | 6                | 0              | -2.412315               | 0.472266  | -2.543464 |
| 10               | 6                | 0              | -1.055945               | 0.341854  | -2.877593 |
| 11               | 6                | 0              | -0.061892               | 0.910381  | -2.063527 |
| 12               | 6                | 0              | -0.473621               | 1.523902  | -0.825551 |
| 13               | 6                | 0              | -1.838061               | 1.994686  | -0.680077 |
| 14               | 6                | 0              | -2.841664               | 1.405603  | -1.534465 |
| 15               | 6                | 0              | -4.199624               | 1.768519  | -1.333952 |
| 16               | 6                | 0              | -4.570071               | 2.718851  | -0.365243 |
| 17               | 6                | 0              | -3.583417               | 3.337475  | 0.424488  |
| 18               | 6                | 0              | -2.228951               | 2.982860  | 0.256249  |
| 19               | 21               | 0              | 0.920686                | -0.224292 | 0.196315  |
| 20               | 6                | 0              | 2.441991                | -0.171168 | 2.214651  |
| 21               | 6                | 0              | 1.480439                | 0.879427  | 2.381987  |
| 22               | 6                | 0              | 0.191046                | 0.277993  | 2.582572  |
| 23               | 6                | 0              | 0.356615                | -1.143479 | 2.529481  |
| 24               | 6                | 0              | 1.739370                | -1.415338 | 2.285607  |
| 25               | 6                | 0              | 1.747529                | 2.353002  | 2.513078  |
| 26               | 6                | 0              | 3.934251                | -0.060627 | 2.077091  |
| 27               | 6                | 0              | -1.053855               | 1.030876  | 2.965436  |
| 28               | 6                | 0              | 2.383092                | -2.771169 | 2.244255  |
| 29               | 6                | 0              | -0.700241               | -2.187086 | 2.761647  |
| 30               | 7                | 0              | 2.487549                | -1.268218 | -1.039830 |
| 31               | 6                | 0              | 2.499491                | -2.461052 | -1.882463 |
| 32               | 6                | 0              | 2.170491                | -3.720833 | -1.068680 |
| 33               | 7                | 0              | 2.767523                | 0.961990  | -0.748375 |
| 34               | 6                | 0              | 3.404506                | 2.234769  | -1.081150 |
| 35               | 6                | 0              | 2.415547                | 3.409050  | -0.997244 |
| 36               | 6                | 0              | 3.158886                | -0.157385 | -1.381286 |
| 37               | 6                | 0              | 4.242126                | -0.150696 | -2.459329 |



|    |   |   |           |           |           |
|----|---|---|-----------|-----------|-----------|
| 38 | 6 | 0 | 1.512731  | -2.294587 | -3.058157 |
| 39 | 6 | 0 | 4.651685  | 2.525232  | -0.216093 |
| 40 | 1 | 0 | 0.284839  | 2.073044  | -0.231528 |
| 41 | 1 | 0 | 0.995463  | 0.891167  | -2.360980 |
| 42 | 1 | 0 | -0.764626 | -0.233513 | -3.772003 |
| 43 | 1 | 0 | -1.449971 | 3.477939  | 0.860530  |
| 44 | 1 | 0 | -3.184754 | -0.030698 | -3.148552 |
| 45 | 1 | 0 | -5.634161 | 2.971483  | -0.223259 |
| 46 | 1 | 0 | -4.971266 | 1.280988  | -1.952851 |
| 47 | 1 | 0 | -3.864090 | 4.093121  | 1.177134  |
| 48 | 1 | 0 | 3.518873  | -2.618821 | -2.320015 |
| 49 | 1 | 0 | 3.754469  | 2.219637  | -2.143434 |
| 50 | 1 | 0 | 2.710897  | 2.640940  | 2.049537  |
| 51 | 1 | 0 | 1.784116  | 2.669557  | 3.582057  |
| 52 | 1 | 0 | 0.951668  | 2.960454  | 2.031151  |
| 53 | 1 | 0 | 4.284627  | -0.464999 | 1.102515  |
| 54 | 1 | 0 | 4.451781  | -0.633156 | 2.880107  |
| 55 | 1 | 0 | 4.277143  | 0.988620  | 2.141129  |
| 56 | 1 | 0 | 1.678380  | -3.547724 | 1.886749  |
| 57 | 1 | 0 | 2.740140  | -3.083662 | 3.254080  |
| 58 | 1 | 0 | 3.257862  | -2.776801 | 1.563603  |
| 59 | 1 | 0 | -1.443522 | 1.673678  | 2.148392  |
| 60 | 1 | 0 | -0.866766 | 1.696010  | 3.839265  |
| 61 | 1 | 0 | -1.870639 | 0.337329  | 3.246108  |
| 62 | 1 | 0 | 4.360567  | 2.695123  | 0.840707  |
| 63 | 1 | 0 | 5.186798  | 3.432554  | -0.573672 |
| 64 | 1 | 0 | 5.360534  | 1.671927  | -0.227984 |
| 65 | 1 | 0 | 0.493590  | -2.130427 | -2.652705 |
| 66 | 1 | 0 | 1.508153  | -3.188362 | -3.720528 |
| 67 | 1 | 0 | 1.777559  | -1.407532 | -3.672075 |
| 68 | 1 | 0 | -1.721424 | -1.767727 | 2.665163  |
| 69 | 1 | 0 | -0.609884 | -2.640828 | 3.775115  |
| 70 | 1 | 0 | -0.626651 | -3.002563 | 2.012222  |
| 71 | 1 | 0 | 2.944317  | -3.906878 | -0.298152 |
| 72 | 1 | 0 | 2.122337  | -4.610480 | -1.733125 |
| 73 | 1 | 0 | 1.190724  | -3.591463 | -0.567071 |
| 74 | 1 | 0 | 3.844728  | 0.261452  | -3.411813 |
| 75 | 1 | 0 | 4.609965  | -1.172425 | -2.668152 |
| 76 | 1 | 0 | 5.109666  | 0.470584  | -2.163517 |
| 77 | 1 | 0 | 1.562039  | 3.263803  | -1.687944 |
| 78 | 1 | 0 | 2.922501  | 4.362260  | -1.260543 |
| 79 | 1 | 0 | 2.009682  | 3.513702  | 0.028364  |
| 80 | 1 | 0 | -3.110060 | 0.366926  | 1.296770  |
| 81 | 1 | 0 | -2.945311 | -3.119469 | -1.287618 |
| 82 | 1 | 0 | -5.569123 | 0.061888  | 1.564382  |
| 83 | 1 | 0 | -5.424801 | -3.416496 | -1.048655 |
| 84 | 1 | 0 | -6.755658 | -1.821982 | 0.383227  |

---

naphthalene

298 K, 1 atm, gas phase

Thermal correction to Enthalpy = 0.151449

Thermal correction to Gibbs Free Energy = 0.112163

Sum of electronic and thermal Enthalpies = -385.471870

Sum of electronic and thermal Free Energies = -385.511156

298 K, in THF

Sum of electronic and thermal Free Energies = -385.888375

Standard orientation:

| Center<br>Number | Atomic<br>Number | Atomic<br>Type | Coordinates (Angstroms) |           |           |
|------------------|------------------|----------------|-------------------------|-----------|-----------|
|                  |                  |                | X                       | Y         | Z         |
| 1                | 6                | 0              | 0.000001                | -2.450989 | 0.712318  |
| 2                | 6                | 0              | 0.000001                | -1.251763 | 1.412643  |
| 3                | 6                | 0              | -0.000000               | 0.000000  | 0.723219  |
| 4                | 6                | 0              | -0.000000               | 0.000000  | -0.723219 |
| 5                | 6                | 0              | 0.000001                | -1.251763 | -1.412643 |
| 6                | 6                | 0              | 0.000001                | -2.450989 | -0.712318 |
| 7                | 1                | 0              | -0.000000               | 1.249249  | 2.515094  |
| 8                | 1                | 0              | 0.000001                | -3.408535 | 1.257018  |
| 9                | 1                | 0              | 0.000001                | -1.249250 | 2.515094  |
| 10               | 6                | 0              | -0.000000               | 1.251763  | 1.412643  |
| 11               | 6                | 0              | -0.000000               | 1.251763  | -1.412643 |
| 12               | 1                | 0              | 0.000001                | -1.249250 | -2.515094 |
| 13               | 1                | 0              | 0.000001                | -3.408535 | -1.257018 |
| 14               | 6                | 0              | -0.000001               | 2.450989  | -0.712319 |
| 15               | 6                | 0              | -0.000001               | 2.450989  | 0.712319  |
| 16               | 1                | 0              | -0.000000               | 1.249249  | -2.515094 |
| 17               | 1                | 0              | -0.000001               | 3.408536  | -1.257017 |
| 18               | 1                | 0              | -0.000001               | 3.408536  | 1.257017  |

## IM2

298 K, 1 atm, gas phase

Thermal correction to Enthalpy = 0.581820

Thermal correction to Gibbs Free Energy = 0.477903

Sum of electronic and thermal Enthalpies = -1898.744901

Sum of electronic and thermal Free Energies = -1898.848819

298 K, in THF

Sum of electronic and thermal Free Energies = -1185.832760

Standard orientation:

| Center<br>Number | Atomic<br>Number | Atomic<br>Type | Coordinates (Angstroms) |           |           |
|------------------|------------------|----------------|-------------------------|-----------|-----------|
|                  |                  |                | X                       | Y         | Z         |
| 1                | 6                | 0              | -2.728034               | -1.422170 | -0.191712 |
| 2                | 6                | 0              | -2.156028               | -1.646007 | 1.106951  |
| 3                | 6                | 0              | -0.971264               | -2.439894 | 0.939100  |

|    |    |   |           |           |           |
|----|----|---|-----------|-----------|-----------|
| 4  | 6  | 0 | -0.813857 | -2.701934 | -0.461378 |
| 5  | 6  | 0 | -1.897681 | -2.081696 | -1.160140 |
| 6  | 6  | 0 | 0.306458  | -3.468005 | -1.109446 |
| 7  | 6  | 0 | -0.064682 | -2.960452 | 2.024308  |
| 8  | 6  | 0 | -2.743904 | -1.123886 | 2.390335  |
| 9  | 21 | 0 | -0.553406 | -0.204460 | -0.162737 |
| 10 | 6  | 0 | -2.049075 | -2.081679 | -2.659185 |
| 11 | 6  | 0 | -3.986849 | -0.631510 | -0.434492 |
| 12 | 7  | 0 | 0.808730  | -0.216268 | -1.728454 |
| 13 | 6  | 0 | 1.533051  | -0.302929 | -0.668452 |
| 14 | 7  | 0 | -1.458517 | 1.814867  | -0.622241 |
| 15 | 6  | 0 | -1.612688 | 2.577152  | -1.851825 |
| 16 | 6  | 0 | -2.573837 | 1.812778  | -2.776521 |
| 17 | 6  | 0 | -0.907036 | 2.318634  | 0.494483  |
| 18 | 6  | 0 | -0.587910 | 3.799596  | 0.671501  |
| 19 | 7  | 0 | -0.590389 | 1.405275  | 1.424167  |
| 20 | 6  | 0 | 0.115264  | 1.736300  | 2.650181  |
| 21 | 6  | 0 | -0.871725 | 2.071998  | 3.789893  |
| 22 | 6  | 0 | -0.259728 | 2.810335  | -2.561645 |
| 23 | 6  | 0 | 1.013442  | 0.549238  | 3.034256  |
| 24 | 1  | 0 | -2.075987 | 3.578070  | -1.639821 |
| 25 | 1  | 0 | -0.853458 | 4.148820  | 1.689112  |
| 26 | 1  | 0 | -1.125918 | 4.425956  | -0.065487 |
| 27 | 1  | 0 | 0.501124  | 3.970078  | 0.534285  |
| 28 | 1  | 0 | 0.428109  | 3.405948  | -1.925847 |
| 29 | 1  | 0 | -0.393501 | 3.351622  | -3.524823 |
| 30 | 1  | 0 | 0.228439  | 1.827742  | -2.745489 |
| 31 | 1  | 0 | 0.786143  | 2.623236  | 2.510159  |
| 32 | 1  | 0 | -3.870444 | 0.425825  | -0.108142 |
| 33 | 1  | 0 | -4.856814 | -1.059509 | 0.115062  |
| 34 | 1  | 0 | -4.251197 | -0.608771 | -1.511299 |
| 35 | 1  | 0 | -2.154249 | 0.807793  | -2.991510 |
| 36 | 1  | 0 | -2.721846 | 2.345981  | -3.740072 |
| 37 | 1  | 0 | -3.560087 | 1.671359  | -2.290439 |
| 38 | 1  | 0 | 0.386265  | -0.345499 | 3.231694  |
| 39 | 1  | 0 | 1.616183  | 0.766876  | 3.942569  |
| 40 | 1  | 0 | 1.685431  | 0.294066  | 2.188207  |
| 41 | 1  | 0 | -1.528509 | 2.925777  | 3.518375  |
| 42 | 1  | 0 | -0.337920 | 2.329820  | 4.731578  |
| 43 | 1  | 0 | -1.527281 | 1.197371  | 3.984566  |
| 44 | 1  | 0 | -2.047471 | -1.258759 | 3.243580  |
| 45 | 1  | 0 | -3.698847 | -1.635482 | 2.656714  |
| 46 | 1  | 0 | -2.955272 | -0.035132 | 2.319939  |
| 47 | 1  | 0 | 0.654320  | -2.952283 | -2.028905 |
| 48 | 1  | 0 | 0.004699  | -4.505931 | -1.386308 |
| 49 | 1  | 0 | 1.186146  | -3.539194 | -0.437445 |
| 50 | 1  | 0 | -0.133931 | -4.068227 | 2.130303  |
| 51 | 1  | 0 | -0.315559 | -2.521895 | 3.011864  |
| 52 | 1  | 0 | 0.998938  | -2.712350 | 1.820316  |
| 53 | 1  | 0 | -2.112378 | -3.114603 | -3.070271 |

|    |   |   |           |           |           |
|----|---|---|-----------|-----------|-----------|
| 54 | 1 | 0 | -1.176874 | -1.586151 | -3.142213 |
| 55 | 1 | 0 | -2.963439 | -1.541009 | -2.979445 |
| 56 | 6 | 0 | 3.010050  | -0.264238 | -0.582461 |
| 57 | 6 | 0 | 3.764584  | 0.634644  | -1.382805 |
| 58 | 6 | 0 | 3.706765  | -1.054194 | 0.365283  |
| 59 | 6 | 0 | 5.153645  | 0.754341  | -1.220665 |
| 60 | 1 | 0 | 3.219730  | 1.232527  | -2.133268 |
| 61 | 6 | 0 | 5.100698  | -0.964742 | 0.501712  |
| 62 | 1 | 0 | 3.117749  | -1.739367 | 0.999860  |
| 63 | 6 | 0 | 5.833608  | -0.047075 | -0.281167 |
| 64 | 1 | 0 | 5.721256  | 1.471382  | -1.840615 |
| 65 | 1 | 0 | 5.624335  | -1.604274 | 1.233409  |
| 66 | 1 | 0 | 6.925271  | 0.047073  | -0.153693 |

## 2a-Sc

298 K, 1 atm, gas phase

Thermal correction to Enthalpy = 0.688750

Thermal correction to Gibbs Free Energy = 0.572879

Sum of electronic and thermal Enthalpies = -2222.970620

Sum of electronic and thermal Free Energies = -2223.086492

298 K, in THF

Sum of electronic and thermal Free Energies = -1510.376130

Standard orientation:

| Center<br>Number | Atomic<br>Number | Atomic<br>Type | Coordinates (Angstroms) |           |           |
|------------------|------------------|----------------|-------------------------|-----------|-----------|
|                  |                  |                | X                       | Y         | Z         |
| 1                | 7                | 0              | 2.326600                | -0.665515 | 1.749050  |
| 2                | 7                | 0              | 2.449199                | 1.459541  | 1.005782  |
| 3                | 6                | 0              | -1.464836               | 0.796349  | -0.162559 |
| 4                | 6                | 0              | -1.515350               | -0.729878 | 0.175129  |
| 5                | 6                | 0              | 2.147398                | -1.701640 | 2.754896  |
| 6                | 1                | 0              | 2.980804                | -1.671623 | 3.506973  |
| 7                | 6                | 0              | 0.808477                | -1.529862 | 3.507804  |
| 8                | 1                | 0              | 0.759652                | -0.554580 | 4.035235  |
| 9                | 1                | 0              | 0.656030                | -2.335756 | 4.259472  |
| 10               | 1                | 0              | -0.015407               | -1.564750 | 2.763241  |
| 11               | 6                | 0              | 2.182222                | -3.073864 | 2.063569  |
| 12               | 1                | 0              | 1.371221                | -3.109845 | 1.306362  |
| 13               | 1                | 0              | 2.028264                | -3.896524 | 2.794606  |
| 14               | 1                | 0              | 3.150417                | -3.233624 | 1.549433  |
| 15               | 6                | 0              | 2.569620                | 0.620325  | 2.046491  |
| 16               | 6                | 0              | 2.941443                | 1.101314  | 3.444011  |
| 17               | 1                | 0              | 3.732406                | 1.876702  | 3.388259  |
| 18               | 1                | 0              | 3.301711                | 0.270086  | 4.079910  |
| 19               | 1                | 0              | 2.066437                | 1.564110  | 3.945372  |
| 20               | 6                | 0              | 2.396768                | 2.906600  | 1.162907  |
| 21               | 1                | 0              | 3.164554                | 3.251839  | 1.904481  |

|    |    |   |           |           |           |
|----|----|---|-----------|-----------|-----------|
| 22 | 6  | 0 | 1.003968  | 3.366621  | 1.651522  |
| 23 | 1  | 0 | 0.246245  | 3.036128  | 0.906071  |
| 24 | 1  | 0 | 0.957394  | 4.472027  | 1.767942  |
| 25 | 1  | 0 | 0.745083  | 2.907590  | 2.628794  |
| 26 | 6  | 0 | 2.719893  | 3.568140  | -0.186002 |
| 27 | 1  | 0 | 3.744751  | 3.312049  | -0.520584 |
| 28 | 1  | 0 | 2.632560  | 4.674084  | -0.123698 |
| 29 | 1  | 0 | 2.003717  | 3.199655  | -0.949149 |
| 30 | 6  | 0 | 2.964675  | -0.038841 | -2.042875 |
| 31 | 6  | 0 | 1.706948  | 0.292250  | -2.636265 |
| 32 | 6  | 0 | 0.853172  | -0.856585 | -2.524182 |
| 33 | 6  | 0 | 1.596659  | -1.912001 | -1.897511 |
| 34 | 6  | 0 | 2.895305  | -1.400951 | -1.581493 |
| 35 | 6  | 0 | 4.195640  | 0.818643  | -1.927643 |
| 36 | 1  | 0 | 4.046428  | 1.812320  | -2.395332 |
| 37 | 1  | 0 | 5.072722  | 0.341974  | -2.422966 |
| 38 | 1  | 0 | 4.465594  | 0.994765  | -0.863417 |
| 39 | 6  | 0 | 1.299018  | 1.601389  | -3.258661 |
| 40 | 1  | 0 | 0.470984  | 2.065079  | -2.678068 |
| 41 | 1  | 0 | 0.949453  | 1.464232  | -4.306527 |
| 42 | 1  | 0 | 2.140161  | 2.324241  | -3.278757 |
| 43 | 6  | 0 | -0.561189 | -0.948579 | -3.025621 |
| 44 | 1  | 0 | -1.098274 | 0.011180  | -2.877675 |
| 45 | 1  | 0 | -1.131885 | -1.725122 | -2.477581 |
| 46 | 1  | 0 | -0.608313 | -1.197672 | -4.111870 |
| 47 | 6  | 0 | 1.062348  | -3.293232 | -1.626318 |
| 48 | 1  | 0 | 0.156259  | -3.232523 | -0.983358 |
| 49 | 1  | 0 | 1.804913  | -3.918672 | -1.090167 |
| 50 | 1  | 0 | 0.792528  | -3.821727 | -2.568232 |
| 51 | 6  | 0 | 4.046676  | -2.123139 | -0.934761 |
| 52 | 1  | 0 | 4.329707  | -1.651027 | 0.031658  |
| 53 | 1  | 0 | 4.950149  | -2.119705 | -1.587052 |
| 54 | 1  | 0 | 3.794434  | -3.181381 | -0.721562 |
| 55 | 7  | 0 | -0.397915 | -1.325331 | 0.376991  |
| 56 | 7  | 0 | -0.325153 | 1.291008  | -0.484178 |
| 57 | 21 | 0 | 1.290351  | -0.089111 | -0.169671 |
| 58 | 6  | 0 | -2.811680 | -1.504557 | 0.158021  |
| 59 | 6  | 0 | -3.843088 | -1.220185 | -0.767364 |
| 60 | 6  | 0 | -2.972724 | -2.611323 | 1.023657  |
| 61 | 6  | 0 | -5.000329 | -2.016922 | -0.822942 |
| 62 | 1  | 0 | -3.728056 | -0.368490 | -1.456087 |
| 63 | 6  | 0 | -4.138034 | -3.391323 | 0.988642  |
| 64 | 1  | 0 | -2.142048 | -2.844556 | 1.709514  |
| 65 | 6  | 0 | -5.159199 | -3.098969 | 0.061348  |
| 66 | 1  | 0 | -5.786774 | -1.788130 | -1.561760 |
| 67 | 1  | 0 | -4.252626 | -4.240954 | 1.683286  |
| 68 | 1  | 0 | -6.072021 | -3.716783 | 0.025609  |
| 69 | 6  | 0 | -2.679280 | 1.682541  | -0.016037 |
| 70 | 6  | 0 | -3.659611 | 1.469504  | 0.981626  |
| 71 | 6  | 0 | -2.811266 | 2.815174  | -0.853185 |

|    |   |   |           |          |           |
|----|---|---|-----------|----------|-----------|
| 72 | 6 | 0 | -4.736028 | 2.360887 | 1.136286  |
| 73 | 1 | 0 | -3.572142 | 0.596339 | 1.647027  |
| 74 | 6 | 0 | -3.897689 | 3.691873 | -0.717715 |
| 75 | 1 | 0 | -2.020619 | 2.985655 | -1.601938 |
| 76 | 6 | 0 | -4.866882 | 3.470180 | 0.281753  |
| 77 | 1 | 0 | -5.482232 | 2.184252 | 1.929202  |
| 78 | 1 | 0 | -3.990804 | 4.560821 | -1.391322 |
| 79 | 1 | 0 | -5.718146 | 4.162098 | 0.395067  |

**TS3'**

298 K, 1 atm, gas phase

Thermal correction to Enthalpy = 0.686846

Thermal correction to Gibbs Free Energy = 0.571505

Sum of electronic and thermal Enthalpies = -2222.907867

Sum of electronic and thermal Free Energies = -2223.023208

298 K, in THF

Sum of electronic and thermal Free Energies = -1510.316743

Standard orientation:

| Center<br>Number | Atomic<br>Number | Atomic<br>Type | Coordinates (Angstroms) |           |           |
|------------------|------------------|----------------|-------------------------|-----------|-----------|
|                  |                  |                | X                       | Y         | Z         |
| 1                | 6                | 0              | 2.259367                | -2.073672 | -1.315233 |
| 2                | 6                | 0              | 0.964067                | -2.693956 | -1.290402 |
| 3                | 6                | 0              | 0.112408                | -1.976095 | -2.187771 |
| 4                | 6                | 0              | 0.863492                | -0.882826 | -2.724364 |
| 5                | 6                | 0              | 2.203774                | -0.966997 | -2.222258 |
| 6                | 6                | 0              | 1.673130                | -0.636138 | 2.316738  |
| 7                | 6                | 0              | 2.028575                | -0.541764 | 3.801889  |
| 8                | 6                | 0              | 0.648273                | -3.954929 | -0.537182 |
| 9                | 6                | 0              | -1.245498               | -2.370820 | -2.695749 |
| 10               | 6                | 0              | 0.323495                | 0.135058  | -3.691006 |
| 11               | 6                | 0              | 3.335612                | -0.099054 | -2.694485 |
| 12               | 6                | 0              | 3.453628                | -2.588853 | -0.556760 |
| 13               | 7                | 0              | 2.410955                | -0.097369 | 1.342283  |
| 14               | 6                | 0              | 3.566657                | 0.736506  | 1.637097  |
| 15               | 6                | 0              | 3.149360                | 2.163940  | 2.059854  |
| 16               | 7                | 0              | 0.570944                | -1.274311 | 1.890608  |
| 17               | 6                | 0              | -0.416277               | -1.753271 | 2.851002  |
| 18               | 6                | 0              | -1.440620               | -0.652195 | 3.207661  |
| 19               | 6                | 0              | 4.508205                | 0.807908  | 0.428681  |
| 20               | 6                | 0              | -1.116703               | -3.007330 | 2.314444  |
| 21               | 6                | 0              | 0.372142                | 2.029213  | -0.695665 |
| 22               | 7                | 0              | 1.517227                | 1.620569  | -0.809725 |
| 23               | 6                | 0              | -0.357130               | 3.292482  | -0.533213 |
| 24               | 6                | 0              | -1.604832               | 3.566366  | -1.149808 |
| 25               | 6                | 0              | -2.249241               | 4.793528  | -0.916763 |
| 26               | 6                | 0              | -1.669979               | 5.763142  | -0.078817 |

|    |    |   |           |           |           |
|----|----|---|-----------|-----------|-----------|
| 27 | 6  | 0 | -0.427203 | 5.499768  | 0.530708  |
| 28 | 6  | 0 | 0.222408  | 4.277174  | 0.306325  |
| 29 | 1  | 0 | -2.046340 | 2.793225  | -1.789434 |
| 30 | 1  | 0 | -3.218911 | 4.995180  | -1.401692 |
| 31 | 1  | 0 | -2.181900 | 6.723796  | 0.097234  |
| 32 | 1  | 0 | 0.038816  | 6.252494  | 1.187937  |
| 33 | 1  | 0 | 1.186248  | 4.059031  | 0.790577  |
| 34 | 1  | 0 | 0.082870  | -2.051283 | 3.806996  |
| 35 | 1  | 0 | -0.927897 | 0.254974  | 3.591528  |
| 36 | 1  | 0 | -2.161242 | -0.998188 | 3.981505  |
| 37 | 1  | 0 | -2.011999 | -0.358231 | 2.306080  |
| 38 | 1  | 0 | -1.497123 | -2.797974 | 1.298584  |
| 39 | 1  | 0 | -1.971990 | -3.305887 | 2.957512  |
| 40 | 1  | 0 | -0.409268 | -3.858120 | 2.246016  |
| 41 | 1  | 0 | 3.036613  | -0.118723 | 3.964955  |
| 42 | 1  | 0 | 1.994522  | -1.545525 | 4.273462  |
| 43 | 1  | 0 | 1.297609  | 0.095187  | 4.341909  |
| 44 | 1  | 0 | 4.159097  | 0.295543  | 2.481751  |
| 45 | 1  | 0 | 2.627559  | 2.641836  | 1.206127  |
| 46 | 1  | 0 | 4.030045  | 2.786130  | 2.335208  |
| 47 | 1  | 0 | 2.452816  | 2.144092  | 2.924041  |
| 48 | 1  | 0 | 4.835111  | -0.205579 | 0.126331  |
| 49 | 1  | 0 | 5.409073  | 1.415447  | 0.664031  |
| 50 | 1  | 0 | 3.973727  | 1.268921  | -0.422656 |
| 51 | 1  | 0 | 3.152010  | 0.968398  | -2.445265 |
| 52 | 1  | 0 | 3.457906  | -0.173815 | -3.798841 |
| 53 | 1  | 0 | 4.298916  | -0.389379 | -2.231686 |
| 54 | 1  | 0 | -0.631152 | 0.563123  | -3.312179 |
| 55 | 1  | 0 | 0.118867  | -0.300710 | -4.697311 |
| 56 | 1  | 0 | 1.029443  | 0.979195  | -3.822807 |
| 57 | 1  | 0 | -1.983422 | -1.544658 | -2.625574 |
| 58 | 1  | 0 | -1.660849 | -3.238023 | -2.145988 |
| 59 | 1  | 0 | -1.186725 | -2.663343 | -3.770201 |
| 60 | 1  | 0 | 1.099991  | -4.853674 | -1.020865 |
| 61 | 1  | 0 | -0.443900 | -4.129880 | -0.464158 |
| 62 | 1  | 0 | 1.037598  | -3.901192 | 0.500011  |
| 63 | 1  | 0 | 4.395300  | -2.141726 | -0.935945 |
| 64 | 1  | 0 | 3.549074  | -3.693689 | -0.651260 |
| 65 | 1  | 0 | 3.387995  | -2.340508 | 0.525139  |
| 66 | 21 | 0 | 0.673488  | -0.384828 | -0.255518 |
| 67 | 7  | 0 | -1.310085 | 0.822184  | -0.816729 |
| 68 | 6  | 0 | -1.563342 | -0.293229 | -0.262738 |
| 69 | 6  | 0 | -2.982085 | -0.716517 | -0.075440 |
| 70 | 6  | 0 | -3.944897 | 0.271862  | 0.262354  |
| 71 | 6  | 0 | -3.411134 | -2.062629 | -0.133325 |
| 72 | 6  | 0 | -5.274722 | -0.077206 | 0.543197  |
| 73 | 1  | 0 | -3.608899 | 1.321197  | 0.301403  |
| 74 | 6  | 0 | -4.746288 | -2.411269 | 0.122833  |
| 75 | 1  | 0 | -2.677720 | -2.841402 | -0.384299 |
| 76 | 6  | 0 | -5.686470 | -1.421930 | 0.471859  |

|    |   |   |           |           |          |
|----|---|---|-----------|-----------|----------|
| 77 | 1 | 0 | -6.001429 | 0.707151  | 0.816921 |
| 78 | 1 | 0 | -5.055721 | -3.468114 | 0.058867 |
| 79 | 1 | 0 | -6.730285 | -1.699013 | 0.694864 |

---

## 2a'-Sc

298 K, 1 atm, gas phase

Thermal correction to Enthalpy = 0.689534

Thermal correction to Gibbs Free Energy = 0.575105

Sum of electronic and thermal Enthalpies = -2222.947787

Sum of electronic and thermal Free Energies = -2223.062215

298 K, in THF

Sum of electronic and thermal Free Energies = -1510.353206

Standard orientation:

---

| Center<br>Number | Atomic<br>Number | Atomic<br>Type | Coordinates (Angstroms) |           |           |
|------------------|------------------|----------------|-------------------------|-----------|-----------|
|                  |                  |                | X                       | Y         | Z         |
| 1                | 6                | 0              | 0.973594                | -2.299176 | 2.086151  |
| 2                | 6                | 0              | 1.909113                | -1.210750 | 2.205928  |
| 3                | 6                | 0              | 1.177611                | -0.038148 | 2.577447  |
| 4                | 6                | 0              | -0.209927               | -0.393069 | 2.657717  |
| 5                | 6                | 0              | -0.330419               | -1.795764 | 2.391452  |
| 6                | 6                | 0              | 1.521208                | -1.964444 | -1.928984 |
| 7                | 6                | 0              | 1.915974                | -2.487219 | -3.308859 |
| 8                | 6                | 0              | 3.397992                | -1.363771 | 2.064053  |
| 9                | 6                | 0              | 1.731343                | 1.284019  | 3.031970  |
| 10               | 6                | 0              | -1.327486               | 0.536025  | 3.042152  |
| 11               | 6                | 0              | -1.624063               | -2.558920 | 2.466198  |
| 12               | 6                | 0              | 1.360569                | -3.713771 | 1.741224  |
| 13               | 7                | 0              | 0.443812                | -2.411894 | -1.269227 |
| 14               | 6                | 0              | -0.580493               | -3.239754 | -1.893467 |
| 15               | 6                | 0              | -1.459787               | -2.407340 | -2.852696 |
| 16               | 7                | 0              | 2.231788                | -1.019074 | -1.288854 |
| 17               | 6                | 0              | 3.330363                | -0.348350 | -1.975203 |
| 18               | 6                | 0              | 2.827496                | 0.880282  | -2.764804 |
| 19               | 6                | 0              | -1.452183               | -3.877067 | -0.803574 |
| 20               | 6                | 0              | 4.449315                | 0.033478  | -0.993203 |
| 21               | 6                | 0              | -2.085139               | 0.641222  | -0.182571 |
| 22               | 7                | 0              | -1.623583               | -0.550678 | -0.051613 |
| 23               | 6                | 0              | -3.564158               | 0.914025  | -0.322914 |
| 24               | 6                | 0              | -4.086106               | 2.226600  | -0.393222 |
| 25               | 6                | 0              | -5.470750               | 2.442759  | -0.514167 |
| 26               | 6                | 0              | -6.357783               | 1.352452  | -0.571766 |
| 27               | 6                | 0              | -5.846457               | 0.039840  | -0.504991 |
| 28               | 6                | 0              | -4.466530               | -0.173989 | -0.379980 |
| 29               | 1                | 0              | -3.370678               | 3.060912  | -0.346446 |
| 30               | 1                | 0              | -5.862282               | 3.473317  | -0.564198 |
| 31               | 1                | 0              | -7.443593               | 1.522264  | -0.667482 |



|    |    |   |           |           |           |
|----|----|---|-----------|-----------|-----------|
| 32 | 1  | 0 | -6.534805 | -0.821406 | -0.550052 |
| 33 | 1  | 0 | -4.032256 | -1.185773 | -0.321256 |
| 34 | 1  | 0 | 3.803661  | -1.039022 | -2.716607 |
| 35 | 1  | 0 | 2.054934  | 0.581730  | -3.503827 |
| 36 | 1  | 0 | 3.655532  | 1.384223  | -3.310592 |
| 37 | 1  | 0 | 2.361110  | 1.614757  | -2.079924 |
| 38 | 1  | 0 | 4.060104  | 0.683639  | -0.185865 |
| 39 | 1  | 0 | 5.263463  | 0.583488  | -1.512239 |
| 40 | 1  | 0 | 4.881001  | -0.869386 | -0.516529 |
| 41 | 1  | 0 | 1.307162  | -3.360590 | -3.605668 |
| 42 | 1  | 0 | 2.983637  | -2.788332 | -3.320052 |
| 43 | 1  | 0 | 1.789963  | -1.700229 | -4.080646 |
| 44 | 1  | 0 | -0.106912 | -4.071400 | -2.478984 |
| 45 | 1  | 0 | -1.930833 | -1.587837 | -2.268925 |
| 46 | 1  | 0 | -2.257212 | -3.027310 | -3.318797 |
| 47 | 1  | 0 | -0.854695 | -1.954375 | -3.666172 |
| 48 | 1  | 0 | -0.832577 | -4.468680 | -0.100214 |
| 49 | 1  | 0 | -2.224133 | -4.542234 | -1.246568 |
| 50 | 1  | 0 | -1.950657 | -3.064106 | -0.238402 |
| 51 | 1  | 0 | -2.375738 | -2.104134 | 1.785872  |
| 52 | 1  | 0 | -2.038766 | -2.545379 | 3.499337  |
| 53 | 1  | 0 | -1.497718 | -3.618085 | 2.168025  |
| 54 | 1  | 0 | -1.251201 | 1.500838  | 2.498681  |
| 55 | 1  | 0 | -1.327224 | 0.759883  | 4.134552  |
| 56 | 1  | 0 | -2.313378 | 0.104251  | 2.781484  |
| 57 | 1  | 0 | 1.146934  | 2.137673  | 2.633336  |
| 58 | 1  | 0 | 2.784382  | 1.433150  | 2.719440  |
| 59 | 1  | 0 | 1.706787  | 1.356478  | 4.144598  |
| 60 | 1  | 0 | 3.841944  | -1.915690 | 2.926033  |
| 61 | 1  | 0 | 3.909333  | -0.382293 | 2.001391  |
| 62 | 1  | 0 | 3.653893  | -1.924499 | 1.140929  |
| 63 | 1  | 0 | 0.506826  | -4.408668 | 1.875078  |
| 64 | 1  | 0 | 2.192413  | -4.077837 | 2.385457  |
| 65 | 1  | 0 | 1.687507  | -3.802653 | 0.681927  |
| 66 | 21 | 0 | 0.452032  | -0.728261 | 0.214620  |
| 67 | 7  | 0 | -1.276039 | 1.837529  | -0.203200 |
| 68 | 6  | 0 | 0.015517  | 1.601653  | -0.104901 |
| 69 | 6  | 0 | 0.863994  | 2.831465  | -0.166940 |
| 70 | 6  | 0 | 0.368736  | 4.096091  | -0.580868 |
| 71 | 6  | 0 | 2.236025  | 2.742913  | 0.162023  |
| 72 | 6  | 0 | 1.212523  | 5.212695  | -0.659661 |
| 73 | 1  | 0 | -0.701248 | 4.155108  | -0.837898 |
| 74 | 6  | 0 | 3.087039  | 3.857263  | 0.095631  |
| 75 | 1  | 0 | 2.617480  | 1.756692  | 0.465686  |
| 76 | 6  | 0 | 2.577807  | 5.101347  | -0.319607 |
| 77 | 1  | 0 | 0.810010  | 6.185592  | -0.991858 |
| 78 | 1  | 0 | 4.152843  | 3.752183  | 0.359276  |
| 79 | 1  | 0 | 3.240837  | 5.980443  | -0.386079 |

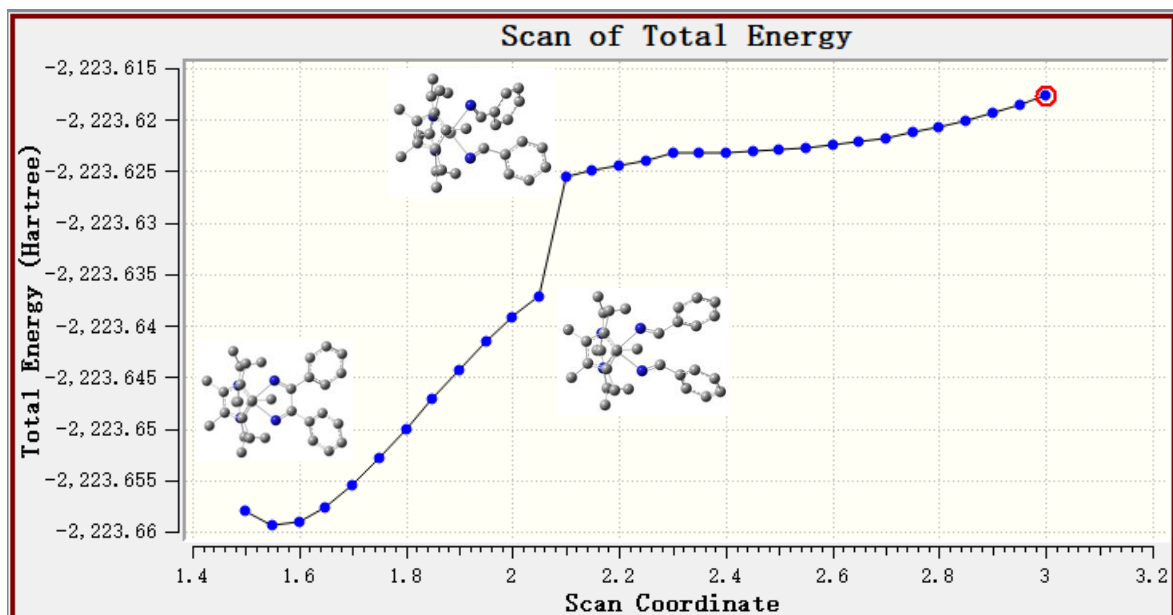

**Figure S31.** The energy profile of the scanning for the formation of **2a-Sc**.

After many attempts, it was found that a transition state **TS3-B3LYP** for the formation of **2a-Sc-B3LYP** from **IM2-B3LYP** could be found at B3LYP-D3 level<sup>14</sup> using the 6-31G(d,p) basis set in gas phase. The effect of solvent was examined by performing single-point self-consistent reaction field (SCRF) calculations based on the solvation model density (SMD)<sup>11</sup> for gas-phase optimized structures. THF was used as solvent, and solvation free energies ( $\Delta G_{\text{sol}}$ ) were calculated at B3LYP-D3/LANL2TZ+ (for Sc)/6-311+G(d,p) (for other elements) level,<sup>12,13</sup> At this calculation level, the formation of **2a-Sc-B3LYP** is also both kinetically and thermodynamically favored over the formation of **2a'-Sc-B3LYP**.

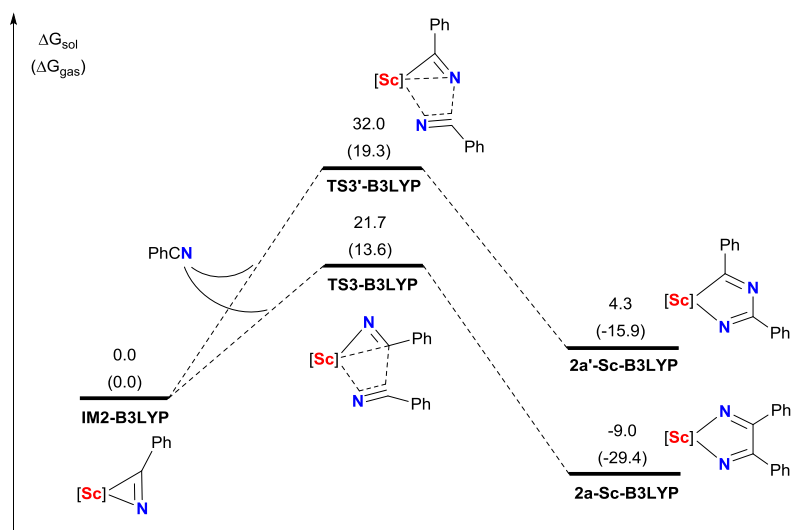

**Figure S32.** DFT-calculated energy profiles of the transformation of **IM2-B3LYP**.

**IM2-B3LYP**

298 K, 1 atm, gas phase

Thermal correction to Enthalpy = 0.601305

Thermal correction to Gibbs Free Energy = 0.498502

Sum of electronic and thermal Enthalpies = -1899.575206

Sum of electronic and thermal Free Energies = -1899.678009

298 K, in THF

Sum of electronic and thermal Free Energies = -1185.797366

Standard orientation:

| Center<br>Number | Atomic<br>Number | Atomic<br>Type | Coordinates (Angstroms) |           |           |
|------------------|------------------|----------------|-------------------------|-----------|-----------|
|                  |                  |                | X                       | Y         | Z         |
| 1                | 6                | 0              | -2.504902               | -1.735926 | -0.077680 |
| 2                | 6                | 0              | -1.963028               | -1.738879 | 1.238929  |
| 3                | 6                | 0              | -0.693851               | -2.387629 | 1.194409  |
| 4                | 6                | 0              | -0.456410               | -2.785744 | -0.151397 |
| 5                | 6                | 0              | -1.569967               | -2.383173 | -0.937291 |
| 6                | 6                | 0              | 0.759331                | -3.488467 | -0.684515 |
| 7                | 6                | 0              | 0.206511                | -2.677008 | 2.364504  |
| 8                | 6                | 0              | -2.665130               | -1.187629 | 2.447932  |
| 9                | 21               | 0              | -0.454272               | -0.230356 | -0.155731 |
| 10               | 6                | 0              | -1.678226               | -2.598395 | -2.422524 |
| 11               | 6                | 0              | -3.843448               | -1.153854 | -0.442915 |
| 12               | 7                | 0              | 1.005459                | -0.242630 | -1.610512 |
| 13               | 6                | 0              | 1.643038                | -0.140023 | -0.502269 |
| 14               | 7                | 0              | -1.633623               | 1.557290  | -0.924083 |
| 15               | 6                | 0              | -1.831832               | 2.141805  | -2.241408 |
| 16               | 6                | 0              | -2.499343               | 1.089466  | -3.134142 |
| 17               | 6                | 0              | -1.292101               | 2.279473  | 0.146012  |
| 18               | 6                | 0              | -1.298611               | 3.803059  | 0.160619  |
| 19               | 7                | 0              | -0.886720               | 1.564562  | 1.195302  |
| 20               | 6                | 0              | -0.402211               | 2.184395  | 2.415481  |
| 21               | 6                | 0              | -1.549711               | 2.423454  | 3.415366  |
| 22               | 6                | 0              | -0.503475               | 2.601290  | -2.872838 |
| 23               | 6                | 0              | 0.670232                | 1.278677  | 3.032284  |
| 24               | 1                | 0              | -2.514425               | 3.010070  | -2.188561 |
| 25               | 1                | 0              | -1.729707               | 4.184360  | 1.089458  |
| 26               | 1                | 0              | -1.863899               | 4.213511  | -0.676764 |
| 27               | 1                | 0              | -0.272425               | 4.180546  | 0.093552  |
| 28               | 1                | 0              | -0.037834               | 3.395955  | -2.280616 |
| 29               | 1                | 0              | -0.657816               | 2.983191  | -3.890772 |
| 30               | 1                | 0              | 0.189863                | 1.754539  | -2.899677 |
| 31               | 1                | 0              | 0.075527                | 3.158830  | 2.213101  |
| 32               | 1                | 0              | -3.873800               | -0.072099 | -0.264176 |
| 33               | 1                | 0              | -4.655589               | -1.611667 | 0.139149  |
| 34               | 1                | 0              | -4.071830               | -1.311475 | -1.501007 |
| 35               | 1                | 0              | -1.841878               | 0.219499  | -3.226283 |
| 36               | 1                | 0              | -2.692586               | 1.486688  | -4.137838 |

|    |   |   |           |           |           |
|----|---|---|-----------|-----------|-----------|
| 37 | 1 | 0 | -3.445045 | 0.756348  | -2.697599 |
| 38 | 1 | 0 | 0.230969  | 0.310381  | 3.295718  |
| 39 | 1 | 0 | 1.097227  | 1.725058  | 3.938833  |
| 40 | 1 | 0 | 1.463613  | 1.088682  | 2.304637  |
| 41 | 1 | 0 | -2.327017 | 3.062947  | 2.983316  |
| 42 | 1 | 0 | -1.186764 | 2.898488  | 4.336173  |
| 43 | 1 | 0 | -2.015488 | 1.468095  | 3.676281  |
| 44 | 1 | 0 | -1.974470 | -1.044877 | 3.284821  |
| 45 | 1 | 0 | -3.469106 | -1.852099 | 2.799952  |
| 46 | 1 | 0 | -3.113978 | -0.212179 | 2.232405  |
| 47 | 1 | 0 | 1.092750  | -3.026977 | -1.619414 |
| 48 | 1 | 0 | 0.569618  | -4.555114 | -0.876897 |
| 49 | 1 | 0 | 1.596901  | -3.421592 | 0.015936  |
| 50 | 1 | 0 | 0.060286  | -3.694340 | 2.758299  |
| 51 | 1 | 0 | 0.026928  | -1.984743 | 3.193200  |
| 52 | 1 | 0 | 1.261231  | -2.579653 | 2.088664  |
| 53 | 1 | 0 | -1.726103 | -3.666136 | -2.678744 |
| 54 | 1 | 0 | -0.808746 | -2.176006 | -2.940852 |
| 55 | 1 | 0 | -2.572140 | -2.122359 | -2.836073 |
| 56 | 6 | 0 | 3.126351  | -0.021544 | -0.398868 |
| 57 | 6 | 0 | 3.907968  | 0.455912  | -1.465799 |
| 58 | 6 | 0 | 3.775699  | -0.356466 | 0.798914  |
| 59 | 6 | 0 | 5.287557  | 0.599645  | -1.335635 |
| 60 | 1 | 0 | 3.394898  | 0.698653  | -2.393032 |
| 61 | 6 | 0 | 5.160469  | -0.235952 | 0.928062  |
| 62 | 1 | 0 | 3.166330  | -0.714597 | 1.626165  |
| 63 | 6 | 0 | 5.922442  | 0.250944  | -0.137478 |
| 64 | 1 | 0 | 5.877628  | 0.979125  | -2.168590 |
| 65 | 1 | 0 | 5.646716  | -0.512518 | 1.861693  |
| 66 | 1 | 0 | 6.999932  | 0.361798  | -0.035566 |

### PhCN-B3LYP

298 K, 1 atm, gas phase

Thermal correction to Enthalpy = 0.106360

Thermal correction to Gibbs Free Energy = 0.069024

Sum of electronic and thermal Enthalpies = -324.400594

Sum of electronic and thermal Free Energies = -324.437931

298 K, in THF

Sum of electronic and thermal Free Energies = -324.527452

Standard orientation:

| Center<br>Number | Atomic<br>Number | Atomic<br>Type | Coordinates (Angstroms) |           |           |
|------------------|------------------|----------------|-------------------------|-----------|-----------|
|                  |                  |                | X                       | Y         | Z         |
| 1                | 6                | 0              | -2.044109               | -0.000168 | 0.000269  |
| 2                | 7                | 0              | -3.207350               | 0.000089  | -0.000510 |
| 3                | 6                | 0              | -0.609729               | -0.000080 | 0.000138  |

|    |   |   |           |           |           |
|----|---|---|-----------|-----------|-----------|
| 4  | 6 | 0 | 0.091179  | -1.217769 | 0.000088  |
| 5  | 6 | 0 | 0.091032  | 1.217696  | 0.000085  |
| 6  | 6 | 0 | 1.483576  | -1.210883 | 0.000013  |
| 7  | 1 | 0 | -0.459053 | -2.152597 | 0.000125  |
| 8  | 6 | 0 | 1.483428  | 1.210981  | 0.000010  |
| 9  | 1 | 0 | -0.459316 | 2.152455  | 0.000120  |
| 10 | 6 | 0 | 2.180130  | 0.000090  | -0.000029 |
| 11 | 1 | 0 | 2.025572  | -2.151320 | -0.000014 |
| 12 | 1 | 0 | 2.025313  | 2.151482  | -0.000020 |
| 13 | 1 | 0 | 3.265888  | 0.000156  | -0.000092 |

### TS3-B3LYP

298 K, 1 atm, gas phase

Thermal correction to Enthalpy = 0.708593

Thermal correction to Gibbs Free Energy = 0.594644

Sum of electronic and thermal Enthalpies = -2223.980534

Sum of electronic and thermal Free Energies = -2224.094483

298 K, in THF

Sum of electronic and thermal Free Energies = -1510.290236

Standard orientation:

| Center<br>Number | Atomic<br>Number | Atomic<br>Type | Coordinates (Angstroms) |           |           |
|------------------|------------------|----------------|-------------------------|-----------|-----------|
|                  |                  |                | X                       | Y         | Z         |
| 1                | 6                | 0              | -3.364764               | -0.955308 | -1.121732 |
| 2                | 6                | 0              | -2.353487               | -1.566166 | -1.907781 |
| 3                | 6                | 0              | -1.657767               | -2.491151 | -1.073959 |
| 4                | 6                | 0              | -2.263999               | -2.473780 | 0.216932  |
| 5                | 6                | 0              | -3.299744               | -1.502747 | 0.190581  |
| 6                | 6                | 0              | -1.856697               | 2.183936  | 0.829504  |
| 7                | 6                | 0              | -2.112499               | 3.589364  | 1.364298  |
| 8                | 6                | 0              | -2.049653               | -1.343055 | -3.361663 |
| 9                | 6                | 0              | -0.540067               | -3.379242 | -1.546831 |
| 10               | 6                | 0              | -2.015163               | -3.448020 | 1.334603  |
| 11               | 6                | 0              | -4.258196               | -1.160507 | 1.294909  |
| 12               | 6                | 0              | -4.408533               | 0.035671  | -1.552619 |
| 13               | 6                | 0              | 1.003979                | 0.402578  | -0.700521 |
| 14               | 6                | 0              | 2.356435                | 1.024266  | -0.722842 |
| 15               | 6                | 0              | 2.714372                | 1.942386  | 0.276005  |
| 16               | 6                | 0              | 3.981944                | 2.524649  | 0.297003  |
| 17               | 6                | 0              | 4.930558                | 2.170289  | -0.667024 |
| 18               | 6                | 0              | 4.588775                | 1.249801  | -1.663511 |
| 19               | 6                | 0              | 3.310788                | 0.695675  | -1.699581 |
| 20               | 7                | 0              | -1.622995               | 1.152394  | 1.637488  |
| 21               | 6                | 0              | -1.463808               | 1.329287  | 3.070399  |
| 22               | 6                | 0              | 0.015851                | 1.586888  | 3.418849  |
| 23               | 7                | 0              | -1.853227               | 1.889433  | -0.472136 |

|    |   |   |           |           |           |
|----|---|---|-----------|-----------|-----------|
| 24 | 6 | 0 | -1.748826 | 2.919780  | -1.499360 |
| 25 | 6 | 0 | -0.379789 | 3.630003  | -1.466755 |
| 26 | 6 | 0 | -1.991884 | 0.099210  | 3.819589  |
| 27 | 6 | 0 | -1.958820 | 2.287118  | -2.878999 |
| 28 | 6 | 0 | 1.326546  | -1.620691 | 1.513484  |
| 29 | 7 | 0 | 0.307367  | -1.720535 | 2.077714  |
| 30 | 6 | 0 | 2.652625  | -1.686537 | 0.977189  |
| 31 | 6 | 0 | 2.928549  | -2.525867 | -0.115462 |
| 32 | 6 | 0 | 4.225885  | -2.606590 | -0.609203 |
| 33 | 6 | 0 | 5.251370  | -1.854154 | -0.029259 |
| 34 | 6 | 0 | 4.974004  | -1.012513 | 1.049939  |
| 35 | 6 | 0 | 3.682258  | -0.925431 | 1.557235  |
| 36 | 1 | 0 | 2.121063  | -3.079566 | -0.578723 |
| 37 | 1 | 0 | 4.434580  | -3.247553 | -1.460829 |
| 38 | 1 | 0 | 6.258643  | -1.905581 | -0.432359 |
| 39 | 1 | 0 | 5.759391  | -0.399037 | 1.479424  |
| 40 | 1 | 0 | 3.452018  | -0.253810 | 2.375941  |
| 41 | 1 | 0 | -2.534636 | 3.685824  | -1.363635 |
| 42 | 1 | 0 | -0.185013 | 4.088369  | -0.491971 |
| 43 | 1 | 0 | -0.327458 | 4.418274  | -2.229290 |
| 44 | 1 | 0 | 0.411752  | 2.902336  | -1.656890 |
| 45 | 1 | 0 | -1.218936 | 1.496183  | -3.029640 |
| 46 | 1 | 0 | -1.842741 | 3.039970  | -3.668354 |
| 47 | 1 | 0 | -2.955868 | 1.851495  | -2.962898 |
| 48 | 1 | 0 | -2.920190 | 3.568824  | 2.102470  |
| 49 | 1 | 0 | -2.393135 | 4.282444  | 0.571890  |
| 50 | 1 | 0 | -1.222414 | 3.983355  | 1.865584  |
| 51 | 1 | 0 | -2.040269 | 2.196483  | 3.432952  |
| 52 | 1 | 0 | 0.622723  | 0.744871  | 3.076795  |
| 53 | 1 | 0 | 0.159770  | 1.714653  | 4.500034  |
| 54 | 1 | 0 | 0.380173  | 2.488144  | 2.913956  |
| 55 | 1 | 0 | -3.064333 | -0.020667 | 3.646636  |
| 56 | 1 | 0 | -1.823159 | 0.197314  | 4.899679  |
| 57 | 1 | 0 | -1.483358 | -0.799242 | 3.464220  |
| 58 | 1 | 0 | -4.005810 | -1.684494 | 2.220536  |
| 59 | 1 | 0 | -5.292681 | -1.431533 | 1.034864  |
| 60 | 1 | 0 | -4.245895 | -0.086321 | 1.514196  |
| 61 | 1 | 0 | -1.007596 | -3.868980 | 1.294621  |
| 62 | 1 | 0 | -2.726180 | -4.286894 | 1.288779  |
| 63 | 1 | 0 | -2.116755 | -2.979207 | 2.316991  |
| 64 | 1 | 0 | 0.216411  | -2.796296 | -2.085366 |
| 65 | 1 | 0 | -0.893418 | -4.166486 | -2.229834 |
| 66 | 1 | 0 | -0.048417 | -3.883398 | -0.707583 |
| 67 | 1 | 0 | -2.188194 | -2.262884 | -3.948210 |
| 68 | 1 | 0 | -1.014321 | -1.007309 | -3.489171 |
| 69 | 1 | 0 | -2.698832 | -0.576173 | -3.793875 |
| 70 | 1 | 0 | -4.243293 | 1.017377  | -1.093420 |
| 71 | 1 | 0 | -5.413462 | -0.303413 | -1.264821 |
| 72 | 1 | 0 | -4.410789 | 0.171974  | -2.637874 |
| 73 | 1 | 0 | 3.021550  | -0.006935 | -2.475982 |

|    |    |   |           |           |           |
|----|----|---|-----------|-----------|-----------|
| 74 | 1  | 0 | 1.974840  | 2.178735  | 1.037472  |
| 75 | 1  | 0 | 5.325773  | 0.966062  | -2.412965 |
| 76 | 1  | 0 | 4.237009  | 3.245575  | 1.071335  |
| 77 | 1  | 0 | 5.927482  | 2.604854  | -0.641242 |
| 78 | 7  | 0 | 0.345505  | 0.052794  | -1.730720 |
| 79 | 21 | 0 | -1.025907 | -0.196704 | -0.171446 |

**TS3'-B3LYP**

298 K, 1 atm, gas phase

Thermal correction to Enthalpy = 0.708907

Thermal correction to Gibbs Free Energy = 0.592944

Sum of electronic and thermal Enthalpies = -2223.967186

Sum of electronic and thermal Free Energies = -2224.083150

298 K, in THF

Sum of electronic and thermal Free Energies = -1510.273888

Standard orientation:

| Center<br>Number | Atomic<br>Number | Atomic<br>Type | Coordinates (Angstroms) |           |           |
|------------------|------------------|----------------|-------------------------|-----------|-----------|
|                  |                  |                | X                       | Y         | Z         |
| 1                | 6                | 0              | 0.408356                | -2.642842 | 1.808323  |
| 2                | 6                | 0              | 1.437301                | -1.697327 | 2.099755  |
| 3                | 6                | 0              | 0.836936                | -0.576409 | 2.731006  |
| 4                | 6                | 0              | -0.557073               | -0.818321 | 2.818893  |
| 5                | 6                | 0              | -0.821399               | -2.111697 | 2.283737  |
| 6                | 6                | 0              | 0.324650                | -2.105836 | -2.123816 |
| 7                | 6                | 0              | 0.406515                | -2.683115 | -3.539120 |
| 8                | 6                | 0              | 2.906971                | -1.968606 | 1.967550  |
| 9                | 6                | 0              | 1.521428                | 0.622797  | 3.324445  |
| 10               | 6                | 0              | -1.553075               | 0.108910  | 3.456315  |
| 11               | 6                | 0              | -2.145732               | -2.811790 | 2.362845  |
| 12               | 6                | 0              | 0.628595                | -3.974549 | 1.144459  |
| 13               | 7                | 0              | -0.815086               | -2.128605 | -1.433581 |
| 14               | 6                | 0              | -2.032375               | -2.645134 | -2.044748 |
| 15               | 6                | 0              | -2.819671               | -1.528527 | -2.760472 |
| 16               | 7                | 0              | 1.354560                | -1.558741 | -1.483962 |
| 17               | 6                | 0              | 2.589293                | -1.274038 | -2.206644 |
| 18               | 6                | 0              | 2.453537                | -0.016192 | -3.087463 |
| 19               | 6                | 0              | -2.914923               | -3.338053 | -1.002668 |
| 20               | 6                | 0              | 3.764866                | -1.128087 | -1.241587 |
| 21               | 6                | 0              | -2.173519               | 0.769026  | 0.184809  |
| 22               | 7                | 0              | -2.370191               | -0.401430 | 0.352104  |
| 23               | 6                | 0              | -2.861485               | 2.039713  | -0.016498 |
| 24               | 6                | 0              | -2.436500               | 3.240129  | 0.573312  |
| 25               | 6                | 0              | -3.168180               | 4.409309  | 0.367547  |
| 26               | 6                | 0              | -4.313782               | 4.400882  | -0.431321 |
| 27               | 6                | 0              | -4.737557               | 3.207735  | -1.022043 |

|    |    |   |           |           |           |
|----|----|---|-----------|-----------|-----------|
| 28 | 6  | 0 | -4.017864 | 2.032673  | -0.813945 |
| 29 | 1  | 0 | -1.533515 | 3.235672  | 1.166376  |
| 30 | 1  | 0 | -2.836237 | 5.335142  | 0.830038  |
| 31 | 1  | 0 | -4.874487 | 5.318341  | -0.592042 |
| 32 | 1  | 0 | -5.630623 | 3.190675  | -1.641434 |
| 33 | 1  | 0 | -4.342271 | 1.099125  | -1.262229 |
| 34 | 1  | 0 | 2.851788  | -2.114503 | -2.872186 |
| 35 | 1  | 0 | 1.630990  | -0.128286 | -3.802161 |
| 36 | 1  | 0 | 3.374472  | 0.179546  | -3.652474 |
| 37 | 1  | 0 | 2.241361  | 0.855725  | -2.465741 |
| 38 | 1  | 0 | 3.555594  | -0.350658 | -0.508732 |
| 39 | 1  | 0 | 4.678770  | -0.855898 | -1.783635 |
| 40 | 1  | 0 | 3.945329  | -2.064451 | -0.708740 |
| 41 | 1  | 0 | 0.173177  | -3.752890 | -3.519309 |
| 42 | 1  | 0 | 1.389900  | -2.563107 | -3.988806 |
| 43 | 1  | 0 | -0.325438 | -2.204304 | -4.195680 |
| 44 | 1  | 0 | -1.793404 | -3.407774 | -2.802718 |
| 45 | 1  | 0 | -3.127630 | -0.776835 | -2.031207 |
| 46 | 1  | 0 | -3.714265 | -1.924133 | -3.259794 |
| 47 | 1  | 0 | -2.198229 | -1.030652 | -3.512599 |
| 48 | 1  | 0 | -2.367776 | -4.158554 | -0.528761 |
| 49 | 1  | 0 | -3.818249 | -3.749900 | -1.471493 |
| 50 | 1  | 0 | -3.206968 | -2.627739 | -0.229870 |
| 51 | 1  | 0 | -2.957201 | -2.176141 | 1.996160  |
| 52 | 1  | 0 | -2.380657 | -3.088066 | 3.401074  |
| 53 | 1  | 0 | -2.153878 | -3.730581 | 1.772826  |
| 54 | 1  | 0 | -1.353861 | 1.151904  | 3.183101  |
| 55 | 1  | 0 | -1.529138 | 0.051878  | 4.555349  |
| 56 | 1  | 0 | -2.571496 | -0.120544 | 3.132824  |
| 57 | 1  | 0 | 1.244198  | 1.552925  | 2.815548  |
| 58 | 1  | 0 | 2.609750  | 0.532413  | 3.271796  |
| 59 | 1  | 0 | 1.256443  | 0.739025  | 4.384463  |
| 60 | 1  | 0 | 3.316513  | -2.405619 | 2.891501  |
| 61 | 1  | 0 | 3.485653  | -1.067106 | 1.751040  |
| 62 | 1  | 0 | 3.103796  | -2.677554 | 1.160642  |
| 63 | 1  | 0 | -0.315288 | -4.406013 | 0.802369  |
| 64 | 1  | 0 | 1.108304  | -4.703330 | 1.814640  |
| 65 | 1  | 0 | 1.265071  | -3.860112 | 0.260009  |
| 66 | 21 | 0 | -0.097676 | -0.672996 | 0.258583  |
| 67 | 7  | 0 | -0.148307 | 1.683368  | 0.039404  |
| 68 | 6  | 0 | 1.017270  | 1.200812  | 0.076356  |
| 69 | 6  | 0 | 2.190166  | 2.113011  | -0.084509 |
| 70 | 6  | 0 | 2.124454  | 3.194178  | -0.982676 |
| 71 | 6  | 0 | 3.385289  | 1.913255  | 0.620593  |
| 72 | 6  | 0 | 3.221038  | 4.031457  | -1.179529 |
| 73 | 1  | 0 | 1.192213  | 3.356160  | -1.515684 |
| 74 | 6  | 0 | 4.476141  | 2.765067  | 0.445332  |
| 75 | 1  | 0 | 3.447804  | 1.081649  | 1.312208  |
| 76 | 6  | 0 | 4.403722  | 3.823433  | -0.463392 |
| 77 | 1  | 0 | 3.154262  | 4.853113  | -1.889852 |



|    |   |   |          |          |           |
|----|---|---|----------|----------|-----------|
| 78 | 1 | 0 | 5.389043 | 2.595153 | 1.011741  |
| 79 | 1 | 0 | 5.260176 | 4.475886 | -0.615657 |

---

## 2a-Sc-B3LYP

298 K, 1 atm, gas phase

Thermal correction to Enthalpy = 0.710898

Thermal correction to Gibbs Free Energy = 0.595734

Sum of electronic and thermal Enthalpies = -2224.036093

Sum of electronic and thermal Free Energies = -2224.151257

298 K, in THF

Sum of electronic and thermal Free Energies = -1510.339238

Standard orientation:

---

| Center<br>Number | Atomic<br>Number | Atomic<br>Type | Coordinates (Angstroms) |           |           |
|------------------|------------------|----------------|-------------------------|-----------|-----------|
|                  |                  |                | X                       | Y         | Z         |
| 1                | 7                | 0              | 2.263276                | -0.628669 | 1.782753  |
| 2                | 7                | 0              | 2.330985                | 1.489941  | 1.060915  |
| 3                | 6                | 0              | -1.490118               | 0.766997  | -0.222891 |
| 4                | 6                | 0              | -1.527978               | -0.755554 | 0.124603  |
| 5                | 6                | 0              | 2.105695                | -1.669660 | 2.787132  |
| 6                | 1                | 0              | 2.934300                | -1.641225 | 3.518342  |
| 7                | 6                | 0              | 0.776396                | -1.515397 | 3.552337  |
| 8                | 1                | 0              | 0.731166                | -0.561157 | 4.087491  |
| 9                | 1                | 0              | 0.641587                | -2.321776 | 4.284810  |
| 10               | 1                | 0              | -0.046069               | -1.545214 | 2.831212  |
| 11               | 6                | 0              | 2.144241                | -3.033743 | 2.088971  |
| 12               | 1                | 0              | 1.333952                | -3.081935 | 1.355514  |
| 13               | 1                | 0              | 2.016880                | -3.847126 | 2.813660  |
| 14               | 1                | 0              | 3.095132                | -3.175854 | 1.569432  |
| 15               | 6                | 0              | 2.473707                | 0.652486  | 2.089775  |
| 16               | 6                | 0              | 2.844305                | 1.130660  | 3.486169  |
| 17               | 1                | 0              | 3.625088                | 1.894155  | 3.429345  |
| 18               | 1                | 0              | 3.202945                | 0.310558  | 4.109605  |
| 19               | 1                | 0              | 1.980907                | 1.583391  | 3.982616  |
| 20               | 6                | 0              | 2.263156                | 2.934287  | 1.229678  |
| 21               | 1                | 0              | 3.038732                | 3.284621  | 1.934025  |
| 22               | 6                | 0              | 0.884717                | 3.375424  | 1.762170  |
| 23               | 1                | 0              | 0.116077                | 3.059891  | 1.049621  |
| 24               | 1                | 0              | 0.839244                | 4.465021  | 1.887846  |
| 25               | 1                | 0              | 0.662831                | 2.914682  | 2.730453  |
| 26               | 6                | 0              | 2.525142                | 3.600862  | -0.125306 |
| 27               | 1                | 0              | 3.516305                | 3.338603  | -0.503953 |
| 28               | 1                | 0              | 2.457215                | 4.692484  | -0.045333 |
| 29               | 1                | 0              | 1.775703                | 3.255417  | -0.843358 |
| 30               | 6                | 0              | 3.064810                | 0.003323  | -1.976499 |
| 31               | 6                | 0              | 1.837538                | 0.302115  | -2.625486 |

|    |    |   |           |           |           |
|----|----|---|-----------|-----------|-----------|
| 32 | 6  | 0 | 1.015939  | -0.861009 | -2.560632 |
| 33 | 6  | 0 | 1.748344  | -1.889367 | -1.900435 |
| 34 | 6  | 0 | 3.008724  | -1.350257 | -1.524976 |
| 35 | 6  | 0 | 4.268726  | 0.888508  | -1.813281 |
| 36 | 1  | 0 | 4.119550  | 1.861394  | -2.289084 |
| 37 | 1  | 0 | 5.161714  | 0.434180  | -2.265537 |
| 38 | 1  | 0 | 4.490580  | 1.072874  | -0.755581 |
| 39 | 6  | 0 | 1.435765  | 1.597158  | -3.275769 |
| 40 | 1  | 0 | 0.505336  | 1.976379  | -2.839427 |
| 41 | 1  | 0 | 1.280773  | 1.474829  | -4.356647 |
| 42 | 1  | 0 | 2.198975  | 2.368680  | -3.138260 |
| 43 | 6  | 0 | -0.370163 | -0.987142 | -3.125381 |
| 44 | 1  | 0 | -0.912680 | -0.040947 | -3.036426 |
| 45 | 1  | 0 | -0.946830 | -1.741685 | -2.583025 |
| 46 | 1  | 0 | -0.362879 | -1.270969 | -4.188196 |
| 47 | 6  | 0 | 1.241022  | -3.284298 | -1.658055 |
| 48 | 1  | 0 | 0.287059  | -3.257277 | -1.120343 |
| 49 | 1  | 0 | 1.940552  | -3.863255 | -1.047963 |
| 50 | 1  | 0 | 1.093153  | -3.829371 | -2.600353 |
| 51 | 6  | 0 | 4.148378  | -2.048498 | -0.836333 |
| 52 | 1  | 0 | 4.372241  | -1.590819 | 0.134570  |
| 53 | 1  | 0 | 5.065075  | -2.007976 | -1.441534 |
| 54 | 1  | 0 | 3.922344  | -3.102965 | -0.656363 |
| 55 | 7  | 0 | -0.417451 | -1.343625 | 0.324393  |
| 56 | 7  | 0 | -0.366373 | 1.273838  | -0.541120 |
| 57 | 21 | 0 | 1.260108  | -0.080375 | -0.175555 |
| 58 | 6  | 0 | -2.820651 | -1.534181 | 0.127361  |
| 59 | 6  | 0 | -3.850658 | -1.277149 | -0.790828 |
| 60 | 6  | 0 | -2.974889 | -2.611048 | 1.014664  |
| 61 | 6  | 0 | -4.999222 | -2.070272 | -0.819834 |
| 62 | 1  | 0 | -3.747640 | -0.451374 | -1.487679 |
| 63 | 6  | 0 | -4.128921 | -3.390864 | 1.002568  |
| 64 | 1  | 0 | -2.157578 | -2.824837 | 1.696895  |
| 65 | 6  | 0 | -5.148528 | -3.124801 | 0.082349  |
| 66 | 1  | 0 | -5.780480 | -1.860629 | -1.546755 |
| 67 | 1  | 0 | -4.234418 | -4.213129 | 1.707028  |
| 68 | 1  | 0 | -6.047511 | -3.736366 | 0.067328  |
| 69 | 6  | 0 | -2.714977 | 1.639035  | -0.090809 |
| 70 | 6  | 0 | -3.674650 | 1.443177  | 0.914722  |
| 71 | 6  | 0 | -2.868073 | 2.740079  | -0.948394 |
| 72 | 6  | 0 | -4.752359 | 2.319145  | 1.057613  |
| 73 | 1  | 0 | -3.574789 | 0.598589  | 1.589137  |
| 74 | 6  | 0 | -3.953296 | 3.603783  | -0.821765 |
| 75 | 1  | 0 | -2.102516 | 2.902711  | -1.701006 |
| 76 | 6  | 0 | -4.902401 | 3.398218  | 0.185124  |
| 77 | 1  | 0 | -5.478644 | 2.154566  | 1.850204  |
| 78 | 1  | 0 | -4.059408 | 4.443883  | -1.504731 |
| 79 | 1  | 0 | -5.747629 | 4.074371  | 0.289138  |

**2a'-Sc-B3LYP**

298 K, 1 atm, gas phase

Thermal correction to Enthalpy = 0.711333

Thermal correction to Gibbs Free Energy = 0.596819

Sum of electronic and thermal Enthalpies = -2224.014710

Sum of electronic and thermal Free Energies = -2224.129224

298 K, in THF

Sum of electronic and thermal Free Energies = -1510.318018

Standard orientation:

| Center<br>Number | Atomic<br>Number | Atomic<br>Type | Coordinates (Angstroms) |           |           |
|------------------|------------------|----------------|-------------------------|-----------|-----------|
|                  |                  |                | X                       | Y         | Z         |
| 1                | 6                | 0              | -0.951741               | -2.976565 | -1.364170 |
| 2                | 6                | 0              | -2.060919               | -2.126796 | -1.638007 |
| 3                | 6                | 0              | -1.605439               | -1.052789 | -2.449273 |
| 4                | 6                | 0              | -0.205157               | -1.228817 | -2.659817 |
| 5                | 6                | 0              | 0.190821                | -2.433785 | -2.009842 |
| 6                | 6                | 0              | -1.471337               | -1.197874 | 2.264141  |
| 7                | 6                | 0              | -1.872802               | -1.335072 | 3.726878  |
| 8                | 6                | 0              | -3.471797               | -2.426785 | -1.217494 |
| 9                | 6                | 0              | -2.482653               | -0.025998 | -3.109138 |
| 10               | 6                | 0              | 0.714307                | -0.347272 | -3.457762 |
| 11               | 6                | 0              | 1.578732                | -3.007783 | -2.047497 |
| 12               | 6                | 0              | -1.057631               | -4.257355 | -0.585251 |
| 13               | 7                | 0              | -0.391543               | -1.815834 | 1.777434  |
| 14               | 6                | 0              | 0.638695                | -2.378828 | 2.641576  |
| 15               | 6                | 0              | 1.554977                | -1.275835 | 3.208480  |
| 16               | 7                | 0              | -2.147491               | -0.476879 | 1.369673  |
| 17               | 6                | 0              | -3.293004               | 0.338713  | 1.750600  |
| 18               | 6                | 0              | -2.860641               | 1.619288  | 2.490321  |
| 19               | 6                | 0              | 1.475982                | -3.384558 | 1.843698  |
| 20               | 6                | 0              | -4.108583               | 0.702705  | 0.506804  |
| 21               | 6                | 0              | 2.126759                | 0.610004  | -0.143897 |
| 22               | 7                | 0              | 1.654712                | -0.570813 | -0.102949 |
| 23               | 6                | 0              | 3.606926                | 0.885559  | -0.068585 |
| 24               | 6                | 0              | 4.130665                | 2.185626  | -0.144611 |
| 25               | 6                | 0              | 5.508653                | 2.402951  | -0.074192 |
| 26               | 6                | 0              | 6.386028                | 1.327894  | 0.077895  |
| 27               | 6                | 0              | 5.872711                | 0.028462  | 0.158063  |
| 28               | 6                | 0              | 4.499532                | -0.187766 | 0.084296  |
| 29               | 1                | 0              | 3.434372                | 3.008465  | -0.256678 |
| 30               | 1                | 0              | 5.898276                | 3.416906  | -0.136640 |
| 31               | 1                | 0              | 7.458885                | 1.498184  | 0.134400  |
| 32               | 1                | 0              | 6.548332                | -0.815797 | 0.278276  |
| 33               | 1                | 0              | 4.074582                | -1.185205 | 0.144116  |
| 34               | 1                | 0              | -3.966721               | -0.228286 | 2.417284  |
| 35               | 1                | 0              | -2.294325               | 1.381249  | 3.396293  |
| 36               | 1                | 0              | -3.730564               | 2.222200  | 2.780314  |

|    |    |   |           |           |           |
|----|----|---|-----------|-----------|-----------|
| 37 | 1  | 0 | -2.221868 | 2.225157  | 1.843474  |
| 38 | 1  | 0 | -3.484900 | 1.257122  | -0.197361 |
| 39 | 1  | 0 | -4.961198 | 1.337571  | 0.774876  |
| 40 | 1  | 0 | -4.484351 | -0.193221 | 0.009991  |
| 41 | 1  | 0 | -1.805269 | -2.382027 | 4.035702  |
| 42 | 1  | 0 | -2.887449 | -0.983671 | 3.912129  |
| 43 | 1  | 0 | -1.192872 | -0.762928 | 4.365157  |
| 44 | 1  | 0 | 0.182304  | -2.917096 | 3.490431  |
| 45 | 1  | 0 | 2.058358  | -0.772865 | 2.378721  |
| 46 | 1  | 0 | 2.310887  | -1.697389 | 3.883370  |
| 47 | 1  | 0 | 0.982638  | -0.526571 | 3.765727  |
| 48 | 1  | 0 | 0.859190  | -4.216853 | 1.495809  |
| 49 | 1  | 0 | 2.287962  | -3.788185 | 2.460745  |
| 50 | 1  | 0 | 1.906141  | -2.875468 | 0.976392  |
| 51 | 1  | 0 | 2.304374  | -2.272953 | -1.685345 |
| 52 | 1  | 0 | 1.859082  | -3.308648 | -3.066330 |
| 53 | 1  | 0 | 1.663893  | -3.889767 | -1.405983 |
| 54 | 1  | 0 | 0.306631  | 0.661119  | -3.571233 |
| 55 | 1  | 0 | 0.901646  | -0.747971 | -4.464875 |
| 56 | 1  | 0 | 1.680149  | -0.246959 | -2.953165 |
| 57 | 1  | 0 | -1.902444 | 0.833835  | -3.454450 |
| 58 | 1  | 0 | -3.262671 | 0.345774  | -2.436744 |
| 59 | 1  | 0 | -2.991141 | -0.443638 | -3.990629 |
| 60 | 1  | 0 | -3.787614 | -3.419404 | -1.568622 |
| 61 | 1  | 0 | -4.175723 | -1.698210 | -1.629047 |
| 62 | 1  | 0 | -3.580205 | -2.414393 | -0.126643 |
| 63 | 1  | 0 | -0.106377 | -4.794982 | -0.565203 |
| 64 | 1  | 0 | -1.807040 | -4.929378 | -1.026764 |
| 65 | 1  | 0 | -1.350764 | -4.068727 | 0.453770  |
| 66 | 21 | 0 | -0.437845 | -0.747348 | -0.182062 |
| 67 | 7  | 0 | 1.337515  | 1.820831  | -0.234335 |
| 68 | 6  | 0 | 0.056798  | 1.605491  | -0.355497 |
| 69 | 6  | 0 | -0.740484 | 2.866508  | -0.332147 |
| 70 | 6  | 0 | -0.418538 | 3.912334  | 0.556024  |
| 71 | 6  | 0 | -1.865445 | 3.034303  | -1.154398 |
| 72 | 6  | 0 | -1.200906 | 5.063030  | 0.629080  |
| 73 | 1  | 0 | 0.458938  | 3.791324  | 1.183376  |
| 74 | 6  | 0 | -2.636746 | 4.196223  | -1.103358 |
| 75 | 1  | 0 | -2.126910 | 2.240456  | -1.842829 |
| 76 | 6  | 0 | -2.315495 | 5.213633  | -0.202605 |
| 77 | 1  | 0 | -0.941808 | 5.849647  | 1.335005  |
| 78 | 1  | 0 | -3.497861 | 4.301291  | -1.759645 |
| 79 | 1  | 0 | -2.927778 | 6.110370  | -0.144509 |

---

## 6) References

[1] Zhu, M.; Li, T.; Chai, Z.; Wei, J.; Lv, Z.-J.; Zhang, W.-X. Diversified Two-Electron Reduction for Trivalent Scandium Complexes with Arene Ligands. *Inorg. Chem. Front.* **2023**,

10, 630-637.

[2] Chen, Y.; Fuyue, L.; Wang, G.; Wang, H.; Lu, C.; Guo, H.; St. Amant, C.; Sun, S.; Xing, Y. Synthesis of 1,2,4-Oxadiazolidines via [3+2] Cycloaddition of Nitrones with Carbodiimides. *New J. Chem.* **2019**, *43*, 4329-4332.

[3] Dolomanov, O. V.; Bourhis, L. J.; Gildea, R. J.; Howard, J. A. K.; Puschmann, H. *OLEX2: A Complete Structure Solution, Refinement and Analysis Program.* *J. Appl. Cryst.* **2009**, *42*, 339-341.

[4] Palatinus, L.; Prathapa, S. J.; van Smaalen, S. *EDMA: A Computer Program for Topological Analysis of Discrete Electron Densities.* *J. Appl. Cryst.* **2012**, *45*, 575-580.

[5] Sheldrick, G. M. A Short History of *SHELX*. *Acta Cryst.* **2008**, *A64*, 112-122.

[6] Sheldrick, G. M. Crystal Structure Refinement with *SHELXL*. *Acta Cryst.* **2015**, *C71*, 3-8.

[7] Frisch, M. J.; Trucks, G. W.; Schlegel, H. B.; Scuseria, G. E.; Robb, M. A.; Cheeseman, J. R.; Scalmani, G.; Barone, V.; Petersson, G. A.; Nakatsuji, H.; Li, X.; Caricato, M.; Marenich, A. V.; Bloino, J.; Janesko, B. G.; Gomperts, R.; Mennucci, B.; Hratchian, H. P.; Ortiz, J. V.; Izmaylov, A. F.; Sonnenberg, J. L.; Williams-Young, D.; Ding, F.; Lipparini, F.; Egidi, F.; Goings, J.; Peng, B.; Petrone, A.; Henderson, T.; Ranasinghe, D.; Zakrzewski, V. G.; Gao, J.; Rega, N.; Zheng, G.; Liang, W.; Hada, M.; Ehara, M.; Toyota, K.; Fukuda, R.; Hasegawa, J.; Ishida, M.; Nakajima, T.; Honda, Y.; Kitao, O.; Nakai, H.; Vreven, T.; Throssell, K.; Montgomery, J. A., Jr.; Peralta, J. E.; Ogliaro, F.; Bearpark, M. J.; Heyd, J. J.; Brothers, E. N.; Kudin, K. N.; Staroverov, V. N.; Keith, T. A.; Kobayashi, R.; Normand, J.; Raghavachari, K.; Rendell, A. P.; Burant, J. C.; Iyengar, S. S.; Tomasi, J.; Cossi, M.; Millam, J. M.; Klene, M.; Adamo, C.; Cammi, R.; Ochterski, J. W.; Martin, R. L.; Morokuma, K.; Farkas, O.; Foresman, J. B.; Fox, D. J. *Gaussian 16, Revision C.01*, Gaussian, Inc., Wallingford CT, 2019.

[8] (a) Perdew, J. P. *Phys. Rev. B* **1986**, *33*, 8822-8824; (b) Becke, A. D. *Phys. Rev. A* **1988**, *38*, 3098-3100.

[9] Grimme, S.; Antony, J.; Ehrlich, S.; Krieg, H. *J. Chem. Phys.* **2010**, *132*, 154104.

[10] Schäfer, A.; Horn, H.; Ahlrichs, R. *J. Chem. Phys.* **1992**, *97*, 2571-2577.

[11] Marenich, A. V.; Cramer, C. J.; Truhlar, D. G. *J. Phys. Chem. B* **2009**, *113*, 6378-6396.

[12] Roy, L. E.; Hay, P. J.; Martin, R. L. *J. Chem. Theory Comput.* **2008**, *4*, 1029-1031.

[13] Krishnan, R.; Binkley, J. S.; Seeger, R.; Pople, J. A. *J. Chem. Phys.* **1980**, *72*, 650-654.

[14] (a) Becke, A. D. *J. Chem. Phys.* **1993**, *98*, 5648; (b) Stephens, P. J.; Devlin, J. F.; Chabalowski, C. F.; Frisch, M. J. *J. Chem. Phys.* **1994**, *98*, 11623.
